# Supplementary material
Source: Research Square preprint supplement (doi:10.21203/rs.3.rs-7181420/v1)
Supplement: Supplementary file 1 [file 003ab179d81991b2418c7c71.docx]

**Supplementary Appendix**

**Clinical Trial of Autologous Cultivated Oral Mucosal Epithelial Cell Sheet Transplantation for Stem Cell-Deficient Vision Loss**

Yoshinori Oie, M.D., Ph.D.,1) Takeshi Soma, M.D.,Ph.D.,1), Hiroshi Takayanagi, M.S.,1,2) Shunji Yokokura, M.D.,3) Ph.D., Toru Nakazawa, M.D., Ph.D.,3) Tomohiko Usui, M.D., Ph.D.,4) Shiro Amano, M.D., Ph.D.,4) Yuko Hara, M.D., Ph.D.,5) Atsushi Shiraishi, M.D., Ph.D., 5) Shoko Matsubara, BA,1) Kiyoshi Okada, M.D., Ph.D.,6) Takahiro Ogasawara, M.S.,7) Masukazu Inoie, M.S.,7) Andrew J. Quantock,8) and Kohji Nishida, M.D., Ph.D.1,9,10)

1. Department of Ophthalmology, Osaka University Graduate School of Medicine, Osaka, Japan
2. Research, Development and Production Department of RAYMEI Incorporated, Osaka, Japan
3. Department of Ophthalmology, Tohoku University Graduate School of Medicine, Sendai, Japan
4. Department of Ophthalmology, University of Tokyo Graduate School of Medicine, Tokyo, Japan
5. Department of Ophthalmology, Ehime University Graduate School of Medicine, Toon, Japan
6. Department of Medical Innovation, Osaka University Hospital, Osaka, Japan
7. Japan Tissue Engineering Co., Ltd, Gamagori, Japan
8. The School of Optometry and Vision Sciences, Cardiff University, Cardiff, United Kingdom
9. Laboratory of Stem Cells and Applied Medicine, Osaka University Graduate School of Medicine, Osaka, Japan
10. Premium Research Institute for Human Metaverse Medicine (WPI-PRIMe), Osaka University, Osaka, Japan

**CONTENTS**

We conducted multicenter clinical trial after clinical study to verify the efficacy and safety of Cultivated Oral Mucosal Epithelial Cell Sheet Transplantation (COMET). In this supplementary appendix, the text related to the clinical trial described in the main text is presented first, followed by the text regarding clinical study.

**SUPPLEMENTARY TABLES OF CLINICAL TRIAL**

**Table S1. Flowchart of the clinical trial**

**Table S2. Schedule and examination up to week 52**

**Table S3. Schedule and examination up to week 104**

**Table S4.** **Results of shipping inspection for the cultivated cell sheets**

**Table S5. LSCD staging of operated and fellow eyes following cultivated oral mucosal epithelial cell sheets transplantation**

**Table S6. Ocular pain following cultivated oral mucosal epithelial cell sheets transplantation**

**Table S7. Foreign body sensation following transplantation of the cultivated oral mucosal epithelial cell sheets**

**Table S8. Lacrimation following cultivated oral mucosal epithelial cell sheet transplantation**

**Table S9. Photophobia following cultivated oral mucosal epithelial cell sheet transplantation**

**Table S10. Dryness following cultivated oral mucosal epithelial cell sheet transplantation**

**Table S11. Discomfort following cultivated oral mucosal epithelial cell sheet transplantation**

**Table S12. Decimal visual acuity following cultivated oral mucosal epithelial cell sheet transplantation**

**Table S13. Early Treatment Diabetic Retinopathy Study visual acuity following cultivated oral mucosal epithelial cell sheet transplantation**

**Table S14. Quality of life score obtained using the 25-item National Eye Institute Visual Function Questionnaire**

**Table S15. Corneal opacification following cultivated oral mucosal epithelial cell sheet transplantation**

**Table S16. Corneal neovascularization following cultivated oral mucosal epithelial cell sheet transplantation**

**Table S17. Symblepharon following cultivated oral mucosal epithelial cell sheet transplantation**

**Table S18. Adverse events during the observation period after tissue collection**

**Table S19. Adverse events after tissue collection during the observation period for each patient**

**Table S20. Adverse events during the treatment period**

**Table S21. Adverse events after tissue collection during the treatment period for each patient**

**SUPPLEMENTARY APPENDIX FOR CLINICAL STUDY**

**TITLE**

**Prospective multicenter clinical study of autologous cultivated oral mucosal epithelial cell sheet transplantation for patients with limbal stem cell deficiency**

**METHODS**

**Study oversight**

**Study protocol**

**Cell culture and evaluation of cultivated oral mucosal epithelial cell sheet**

**Transportation of tissue and cell sheet**

**Cell sheet transplantation and post-operative procedures**

**RESULTS**

**Characteristics of the patients**

**Cultivation and transplantation of oral mucosal epithelial cell sheet**

**Endpoints for efficacy and safety**

**TABLES**

**Table S22. Defined shipment criteria for cultivated cell sheet**

**Table S23. Shipping inspection for the cultivated cell sheets**

**Table S24. Evaluation of conjunctivalization and corneal epithelial defect in cornea (primary endpoint)**

**Table S25. Decimal visual acuity following cultivated oral mucosal epithelial transplantation**

**Table S26. Corneal opacification following cultivated oral mucosal epithelial transplantation**

**Table S27. Corneal neovascularization following cultivated oral mucosal epithelial transplantation**

**Table S28. Serious adverse events**

**Table S29. Adverse events**

**REFERENCES**

**SUPPLEMENTARY TABLES OF CLINICAL TRIAL**

**Table S1. Flowchart of the clinical trial**

| Trial schedule  治験担当部門  治験機器製造部門  移  植  前  移  植  後  適格性  判定委員会  症  例  登  録  組  織  採  取  治  験  機  器  移  植  治験  スケジュール  治験実施医療機関  治験依頼者  登録時  データセンター  同意取得  適格性の調査  適格性調査票  ＜登録センター＞  症例登録  ＜モニタリング担当者＞  適格性確認  治験機器製造協議書  ＜登録センター＞  受領  角膜輪部の採取  組織採取記録  治験機器製造開始  製造可否  スケジュールの  変更の検討  出荷可否  治験機器出荷  ＜モニタリング担当者＞  運搬  治験機器搬入  治験機器移植  不可  可  可  不可  適格性判定  適格性判定  結果通知書  前眼部  写真データ | | Trial site | Sponsor | | Registration data center | Eligibility evaluation committee |
| --- | --- | --- | --- | --- | --- | --- |
| Department in charge of the trial | Department in charge of manufacturing the investigational product |
| Enrollment of the subjects | | Informed consent  Evaluation of eligibility  Eligibility evaluation form for enrollment of subjects  Conference document for manufacturing of the investigational product  <Registration center> Registration of the subjects  <Monitors> Confirmation of eligibility  <Registration center> Receipt  Photographs of the anterior ocular segment  Notification of eligibility results  Determination of eligibility  Biopsy of the oral mucosal tissue  Record of biopsy  Review necessity of change in schedule  Commencement of manufacturing of the investigational product  Can manufacturing be started?  No  Yes  Can the investigational product be shipped?  Delivery of the investigational product  Transplantation of the investigational product  <Monitors> Delivery  Shipment of the investigational product  Yes  No |  |  |  |  |
| Collection of the biopsy sample | |  |  |  |  |  |
| Transplantation of the investigational product | Before transplantation |  |  |  |  |  |
| After transplantation |  |  |  |  |  |

**Table S2. Schedule and examination up to week 52**

| Time  Observation | Observation period | | | | | Follow-up period | | | | | | Dis-continua-tion |
| --- | --- | --- | --- | --- | --- | --- | --- | --- | --- | --- | --- | --- |
| Visit 1 | Visit 2 | | Visit 3 | | | Visit 4 | Visit 5 | Visit 6 | Visit 7 | Visit 8 |
| Informed consent, screening | Biopsy | | Transplantation of the investigational product | | | Week 2 | Week 4 | Week 12 | Week 24 | Week 52 |
| Before biopsy | After biopsy | Before trans-plantation | During trans-plantation | After trans-plantation | (Days 14±3) | (Days 28±3) | (Days 84±14) | (Days 168±14) | (Days 364±28) | (within +7 days) |
|  | (Day 0) |  |
| Subject's background | ⚫ |  |  |  |  | ⚫ |  |  |  |  |  |  |
| Evaluation of eligibility | ⚫ |  |  |  |  |  |  |  |  |  |  |  |
| Laboratory tests | ⚫*1 | ▲ |  | ⚫*1*3 |  | ⚫ |  |  |  |  | ⚫ | ⚫ |
| Intraoral observation | ⚫ |  | ⚫*2 |  |  |  | ⚫ |  |  |  |  |  |
| Corrected visual acuity | 🞋 |  |  |  |  |  | 🞋 | 🞋 | 🞋 | 🞋 | 🞋 | 🞋 |
| Photography of the anterior ocular segment | 🞋 |  |  | 🞋*3 | ◼ | ◼ | 🞋 | 🞋 | 🞋 | 🞋 | 🞋 | 🞋 |
| Evaluation of severity of LSCD according to LSCD classification | 🞋 |  |  |  |  |  | 🞋 | 🞋 | 🞋 | 🞋 | 🞋 | 🞋 |
| Subjective symptoms | 🞋 |  |  |  |  |  | 🞋 | 🞋 | 🞋 | 🞋 | 🞋 | 🞋 |
| Evaluation of QOL | ⚫ |  |  |  |  |  |  |  |  |  | ⚫ | ⚫ |
| Severity of corneal opacity | 🞋 |  |  |  |  |  | 🞋 | 🞋 | 🞋 | 🞋 | 🞋 | 🞋 |
| Severity of corneal neovascularization | 🞋 |  |  |  |  |  | 🞋 | 🞋 | 🞋 | 🞋 | 🞋 | 🞋 |
| Severity of symblepharon | 🞋 |  |  |  |  |  | 🞋 | 🞋 | 🞋 | 🞋 | 🞋 | 🞋 |
| Whether additional treatment to improve visual acuity is indicated or not |  |  |  |  |  |  |  |  |  |  | ◼ | ◼ |
| Safety endpoints | 🞋 |  |  |  |  |  | 🞋 | 🞋 | 🞋 | 🞋 | 🞋 | 🞋 |
| Important malfunctions |  |  |  |  |  | ⚫ | ⚫ | ⚫ | ⚫ | ⚫ | ⚫ | ⚫ |
| Adverse events |  |  | ⚫ |  |  |  |  |  | ⚫ |  |  |  |

⚫ : Implementation

◼ : For the target eye

🞋 : For bilateral eyes

▲ : Blood sampling only

*1 : Urine pregnancy test is necessary for women subjects with childbearing potential.

*2 : Performed within 3 days after collection of oral mucosal tissue

*3 : Within −4 days prior to transplantation of the investigational product

LSCD: limbal stem-cell deficiency, QOL: quality of life

**Table S3. Schedule and examination up to week 104**

| Time  Observation | Informed consent | Week 78 | Week 104 | Additional treatment* (before treatment) | Dis-continua-tion |
| --- | --- | --- | --- | --- | --- |
|  | Days 546±28 | Days 728±56 | Day −35 | Day +35 |
| Subject's background | ⚫ |  |  | ⚫** |  |
| Evaluation of eligibility | ⚫ |  |  |  |  |
| Laboratory tests |  |  | ⚫ | ⚫ | ⚫ |
| Photography of the anterior ocular segment |  | 🞋 | 🞋 | 🞋 | 🞋 |
| Evaluation of the severity of LSCD according to LSCD classification |  | 🞋 | 🞋 | 🞋 | 🞋 |
| Subjective symptoms |  | 🞋 | 🞋 | 🞋 | 🞋 |
| Corrected visual acuity |  | 🞋 | 🞋 | 🞋 | 🞋 |
| Evaluation of QOL |  |  | ⚫ | ⚫ | ⚫ |
| Severity of corneal opacity |  | 🞋 | 🞋 | 🞋 | 🞋 |
| Severity of corneal neovascularization |  | 🞋 | 🞋 | 🞋 | 🞋 |
| Severity of symblepharon |  | 🞋 | 🞋 | 🞋 | 🞋 |
| Contribution to restoration of the corneal surface |  |  | ◼ |  | ◼ |
| Significant failure |  | ⚫ | ⚫ | ⚫ | ⚫ |
| Adverse events |  |  | ⚫ |  |  |

⚫ : Implementation

◼ : For the target eye

🞋 : For bilateral eyes

* : Only for subjects who received additional treatment

** : Performed after additional treatment

LSCD: limbal stem-cell deficiency, QOL: quality of life

|  | Number of alive cells per cell sheet | Cell viability | Epithelial purity | Percentage of p63 positive cells | CFE  (primary culture) | CFE  (subculture) | CFE  (cell sheet) |
| --- | --- | --- | --- | --- | --- | --- | --- |
| A-3 | 30.9 | 96 | 99 | 37 | 3.9 | 23.4 | 6.7 |
| B-1 | 25.4 | 95 | 100 | 69 | 2.8 | 26.4 | 6.1 |
| C-1 | 37.1 | 96 | 99 | 88 | 2.5 | 22.9 | 4.9 |
| C-2 | 39.3 | 93 | 99 | 57 | 5.6 | 32.9 | 4.2 |
| C-3 | 45.1 | 97 | 100 | 53 | 5.2 | 16.1 | 8.7 |
| C-5 | 21.9 | 97 | 100 | 41 | 8.4 | 24.9 | 7.1 |
| Average | 33.3±8.1 | 95.7±1.4 | 99.5±0.5 | 57.5±17.2 | 4.7±2.0 | 24.4±5.0 | 6.3±1.5 |

**Table S4. Results of shipping inspection for the cultivated cell sheets**

CFE: colony-forming efficiency

**Table 5. LSCD staging of operated and fellow eyes following cultivated oral mucosal epithelial cell sheets transplantation**

| Eye | Patient | Preoperative | 2 weeks | 4 weeks | 12 weeks | 24 weeks | 52 weeks | 78 weeks | 104 weeks |
| --- | --- | --- | --- | --- | --- | --- | --- | --- | --- |
| Operated  eye | A-3 | III | IB | IA | IA | IA | IB | IIB | III |
| B-1 | III | IA | IA | IA | IA | IA | IA | IA |
| C-1 | III | IA | IA | IA | IA | IA | IIB | IIB |
| C-2 | III | IA | IA | IA | IA | IA | IA | IB |
| C-3 | III | IA | IA | IA | IA | IA | IA | IA |
| C-5 | III | IA | IA | IA | IA | IA | IA | IA |
| Fellow  eye | A-3 | III | III | III | III | III | III | III | III |
| B-1 | IIB | IIB | IB | III | IC | IB | III | III |
| C-1 | IIB | IIB | IIB | IIB | IIB | IIB | IIB | IIB |
| C-2 | IA | IA | IA | IA | IA | IA | IA | IA |
| C-3 | IIB | IIB | IIB | IIB | IIB | III | IIB | III |
| C-5 | IA | IA | IA | IA | IA | IA | IA | IA |

**Table S6. Ocular pain following cultivated oral mucosal epithelial cell sheets transplantation**

| Eye | Patient | Preoperative | 2 weeks | 4 weeks | 12 weeks | 24 weeks | 52 weeks | 78 weeks | 104 weeks |
| --- | --- | --- | --- | --- | --- | --- | --- | --- | --- |
| Operated  eye | A-3 | 0 | 0 | 0 | 1 | 0 | 0 | 0 | 0 |
| B-1 | 0 | 0 | 0 | 0 | 0 | 0 | 0 | 0 |
| C-1 | 0 | 1 | 1 | 2 | 0 | 0 | 2 | 2 |
| C-2 | 1 | 0 | 0 | 0 | 0 | 0 | 1 | 1 |
| C-3 | 1 | 0 | 1 | 0 | 0 | 0 | 1 | 1 |
| C-5 | 0 | 0 | 0 | 0 | 0 | 0 | 0 | 1 |
| Fellow  eye | A-3 | 0 | 0 | 0 | 0 | 0 | 0 | 0 | 0 |
| B-1 | 0 | 0 | 0 | 0 | 0 | 0 | 0 | 0 |
| C-1 | 0 | 0 | 0 | 0 | 2 | 1 | 0 | 0 |
| C-2 | 0 | 0 | 0 | 0 | 0 | 0 | 1 | 0 |
| C-3 | 1 | 1 | 1 | 1 | 1 | 1 | 1 | 1 |
| C-5 | 0 | 0 | 0 | 0 | 0 | 1 | 0 | 0 |

| Eye | Patient | Preoperative | 2 weeks | 4 weeks | 12 weeks | 24 weeks | 52 weeks | 78 weeks | 104 weeks |
| --- | --- | --- | --- | --- | --- | --- | --- | --- | --- |
| Operated  eye | A-3 | 0 | 0 | 0 | 0 | 0 | 0 | 0 | 0 |
| B-1 | 0 | 0 | 0 | 0 | 0 | 0 | 0 | 0 |
| C-1 | 2 | 0 | 0 | 0 | 0 | 1 | 0 | 0 |
| C-2 | 1 | 0 | 0 | 0 | 0 | 0 | 0 | 0 |
| C-3 | 3 | 0 | 1 | 1 | 0 | 0 | 1 | 1 |
| C-5 | 0 | 0 | 0 | 1 | 0 | 1 | 0 | 1 |
| Fellow  eye | A-3 | 0 | 0 | 0 | 0 | 0 | 0 | 0 | 0 |
| B-1 | 0 | 0 | 0 | 0 | 0 | 0 | 0 | 0 |
| C-1 | 2 | 1 | 0 | 0 | 2 | 1 | 1 | 1 |
| C-2 | 0 | 0 | 0 | 0 | 1 | 0 | 0 | 0 |
| C-3 | 2 | 1 | 1 | 1 | 1 | 3 | 3 | 3 |
| C-5 | 1 | 1 | 1 | 1 | 1 | 1 | 0 | 1 |

**Table S7. Foreign body sensation following transplantation of the cultivated oral mucosal epithelial cell sheets**

| Eye | Patient | Preoperative | 2 weeks | 4 weeks | 12 weeks | 24 weeks | 52 weeks | 78 weeks | 104 weeks |
| --- | --- | --- | --- | --- | --- | --- | --- | --- | --- |
| Operated  eye | A-3 | 0 | 0 | 0 | 0 | 0 | 0 | 0 | 0 |
| B-1 | 0 | 0 | 0 | 0 | 0 | 0 | 0 | 0 |
| C-1 | 4 | 2 | 3 | 3 | 3 | 4 | 4 | 4 |
| C-2 | 0 | 0 | 0 | 0 | 0 | 0 | 0 | 0 |
| C-3 | 2 | 1 | 1 | 1 | 1 | 1 | 1 | 0 |
| C-5 | 0 | 0 | 0 | 1 | 0 | 0 | 0 | 0 |
| Fellow  eye | A-3 | 0 | 0 | 0 | 0 | 0 | 0 | 0 | 0 |
| B-1 | 0 | 0 | 0 | 0 | 0 | 0 | 0 | 0 |
| C-1 | 4 | 4 | 3 | 4 | 4 | 4 | 4 | 4 |
| C-2 | 0 | 0 | 0 | 0 | 0 | 0 | 0 | 0 |
| C-3 | 2 | 2 | 1 | 2 | 1 | 1 | 1 | 1 |
| C-5 | 0 | 0 | 0 | 0 | 0 | 0 | 0 | 0 |

**Table S8. Lacrimation following cultivated oral mucosal epithelial cell sheet transplantation**

| Eye | Patient | Preoperative | 2 weeks | 4 weeks | 12 weeks | 24 weeks | 52 weeks | 78 weeks | 104 weeks |
| --- | --- | --- | --- | --- | --- | --- | --- | --- | --- |
| Operated  eye | A-3 | 0 | 0 | 0 | 0 | 0 | 0 | 0 | 0 |
| B-1 | 0 | 0 | 0 | 0 | 0 | 0 | 0 | 0 |
| C-1 | 4 | 0 | 1 | 2 | 1 | 2 | 3 | 3 |
| C-2 | 4 | 4 | 4 | 4 | 4 | 3 | 4 | 3 |
| C-3 | 4 | 1 | 1 | 1 | 1 | 0 | 0 | 0 |
| C-5 | 0 | 0 | 0 | 1 | 1 | 1 | 1 | 1 |
| Fellow  eye | A-3 | 0 | 0 | 0 | 0 | 0 | 0 | 0 | 0 |
| B-1 | 0 | 0 | 0 | 0 | 0 | 0 | 0 | 0 |
| C-1 | 4 | 3 | 3 | 3 | 3 | 3 | 3 | 3 |
| C-2 | 2 | 3 | 4 | 4 | 3 | 3 | 4 | 3 |
| C-3 | 2 | 2 | 1 | 2 | 3 | 3 | 4 | 4 |
| C-5 | 1 | 0 | 0 | 0 | 1 | 2 | 0 | 0 |

**Table S9. Photophobia following cultivated oral mucosal epithelial cell sheet transplantation**

**Table S10. Dryness following cultivated oral mucosal epithelial cell sheet transplantation**

| Eye | Patient | Preoperative | 2 weeks | 4 weeks | 12 weeks | 24 weeks | 52 weeks | 78 weeks | 104 weeks |
| --- | --- | --- | --- | --- | --- | --- | --- | --- | --- |
| Operated  eye | A-3 | 0 | 0 | 0 | 0 | 0 | 0 | 0 | 0 |
| B-1 | 0 | 0 | 0 | 0 | 0 | 0 | 0 | 0 |
| C-1 | 0 | 0 | 0 | 0 | 0 | 0 | 0 | 0 |
| C-2 | 0 | 4 | 0 | 2 | 0 | 3 | 0 | 0 |
| C-3 | 4 | 1 | 1 | 0 | 1 | 1 | 1 | 1 |
| C-5 | 0 | 0 | 1 | 0 | 2 | 1 | 1 | 2 |
| Fellow  eye | A-3 | 0 | 0 | 0 | 0 | 0 | 0 | 0 | 0 |
| B-1 | 0 | 0 | 0 | 0 | 0 | 0 | 0 | 0 |
| C-1 | 0 | 0 | 0 | 0 | 0 | 0 | 0 | 0 |
| C-2 | 0 | 4 | 3 | 2 | 0 | 0 | 0 | 0 |
| C-3 | 3 | 2 | 1 | 1 | 3 | 1 | 1 | 3 |
| C-5 | 0 | 1 | 2 | 1 | 2 | 2 | 1 | 1 |

**Table S11. Discomfort following cultivated oral mucosal epithelial cell sheet transplantation**

| Eye | Patient | Preoperative | 2 weeks | 4 weeks | 12 weeks | 24 weeks | 52 weeks | 78 weeks | 104 weeks |
| --- | --- | --- | --- | --- | --- | --- | --- | --- | --- |
| Operated  eye | A-3 | 0 | 0 | 0 | 0 | 0 | 0 | 0 | 0 |
| B-1 | 0 | 0 | 0 | 0 | 0 | 0 | 0 | 0 |
| C-1 | 2 | 0 | 0 | 0 | 0 | 1 | 0 | 0 |
| C-2 | 1 | 2 | 0 | 0 | 0 | 2 | 2 | 2 |
| C-3 | 2 | 0 | 0 | 0 | 0 | 0 | 0 | 0 |
| C-5 | 2 | 0 | 0 | 2 | 2 | 0 | 3 | 3 |
| Fellow  eye | A-3 | 0 | 0 | 0 | 0 | 0 | 0 | 0 | 0 |
| B-1 | 0 | 0 | 0 | 0 | 0 | 0 | 0 | 0 |
| C-1 | 2 | 0 | 0 | 0 | 2 | 1 | 0 | 0 |
| C-2 | 0 | 0 | 0 | 0 | 1 | 0 | 1 | 2 |
| C-3 | 1 | 1 | 1 | 0 | 1 | 3 | 3 | 3 |
| C-5 | 0 | 2 | 1 | 1 | 2 | 2 | 0 | 1 |

**Table S12. Decimal visual acuity following cultivated oral mucosal epithelial cell sheet transplantation**

| Eye | Patient | Preoperative | 2 weeks | 4 weeks | 12 weeks | 24 weeks | 52 weeks | 78 weeks | 104 weeks |
| --- | --- | --- | --- | --- | --- | --- | --- | --- | --- |
| Operated  eye | A-3 | 3.00 | 3.00 | 3.00 | 3.00 | 3.00 | 3.00 | 3.00 | 3.00 |
| B-1 | 3.00 | 3.00 | 3.00 | 3.00 | 3.00 | 3.00 | 3.00 | 3.00 |
| C-1 | 1.52 | 1.05 | 0.70 | 0.82 | 0.52 | 1.00 | 0.70 | 1.22 |
| C-2 | 1.70 | 2.00 | 1.70 | 2.00 | 1.70 | 2.00 | 2.00 | 3.00 |
| C-3 | 2.00 | 0.70 | 0.82 | 1.15 | 0.82 | 0.52 | 1.00 | 1.00 |
| C-5 | 2.00 | 0.52 | 0.82 | 1.40 | 1.52 | 1.40 | 1.40 | 1.52 |
| Fellow  eye | A-3 | 3.00 | 2.00 | 3.00 | 3.00 | 3.00 | 3.00 | 3.00 | 3.00 |
| B-1 | 3.00 | 3.00 | 3.00 | 3.00 | 3.00 | 3.00 | 3.00 | 3.00 |
| C-1 | 0.70 | 0.40 | 0.40 | 0.30 | 2.00 | 1.05 | 0.00 | 0.22 |
| C-2 | 1.30 | 1.70 | 1.40 | 1.40 | 1.52 | 1.40 | 1.30 | 1.10 |
| C-3 | 0.30 | 0.52 | 0.52 | 1.00 | 1.10 | 2.00 | 1.30 | 1.52 |
| C-5 | 0.22 | 0.05 | 0.30 | 0.40 | 0.52 | 1.40 | 0.05 | -0.08 |

Visual acuity was shown as LogMAR (logarithm of the minimum angle of resolution)

| Eye | Patient | Preoperative | 2 weeks | 4 weeks | 12 weeks | 24 weeks | 52 weeks | 78 weeks | 104 weeks |
| --- | --- | --- | --- | --- | --- | --- | --- | --- | --- |
| Operated  eye | A-3 | 3.00 | 3.00 | 3.00 | 3.00 | 3.00 | 3.00 | 3.00 | 3.00 |
| B-1 | 3.00 | 3.00 | 3.00 | 3.00 | 3.00 | 3.00 | 3.00 | 3.00 |
| C-1 | 1.50 | 1.00 | 1.04 | 0.88 | 0.46 | 1.16 | 1.04 | 1.44 |
| C-2 | 1.60 | 2.00 | 2.00 | 2.00 | 2.00 | 2.00 | 2.00 | 3.00 |
| C-3 | 2.00 | 0.94 | 1.28 | 1.16 | 1.18 | 1.24 | 2.00 | 1.04 |
| C-5 | 2.00 | 1.28 | 1.40 | 1.48 | 1.52 | 1.50 | 1.54 | 1.50 |
| Fellow  eye | A-3 | 3.00 | 2.00 | 3.00 | 3.00 | 3.00 | 3.00 | 3.00 | 3.00 |
| B-1 | 3.00 | 3.00 | 3.00 | 3.00 | 3.00 | 3.00 | 3.00 | 3.00 |
| C-1 | 0.56 | 0.38 | 0.46 | 0.52 | 1.40 | 1.10 | 0.32 | 0.36 |
| C-2 | 1.40 | 2.00 | 1.50 | 1.28 | 1.40 | 1.30 | 1.20 | 1.02 |
| C-3 | 0.68 | 0.70 | 1.04 | 1.10 | 1.54 | 1.68 | 1.10 | 1.68 |
| C-5 | 0.32 | 0.44 | 0.58 | 0.64 | 1.38 | 1.32 | 0.24 | 0.20 |

**Table S13. Early Treatment Diabetic Retinopathy Study visual acuity following cultivated oral mucosal epithelial cell sheet transplantation**

| Patient | Preoperative | 52 weeks | 104 weeks |
| --- | --- | --- | --- |
| A-3 | 38.1 | 50.0 | 37.7 |
| B-1 | 34.5 | 45.4 | 31.7 |
| C-1 | 42.0 | 65.4 | 78.0 |
| C-2 | 37.4 | 39.6 | 44.3 |
| C-3 | 53.8 | 69.6 | 59.1 |
| C-5 | 81.4 | 28.5 | 61.3 |

**Table S14. Quality of life score obtained using the 25-item National Eye Institute Visual Function Questionnaire**

| Eye | Patient | Preoperative | 2 weeks | 4 weeks | 12 weeks | 24 weeks | 52 weeks | 78 weeks | 104 weeks |
| --- | --- | --- | --- | --- | --- | --- | --- | --- | --- |
| Operated  eye | A-3 | 3 | 2 | 2 | 2 | 2 | 3 | 2 | 2 |
| B-1 | 3 | 2 | 2 | 2 | 2 | 2 | 2 | 2 |
| C-1 | 2 | 0 | 1 | 1 | 1 | 2 | 2 | 2 |
| C-2 | 2 | 1 | 2 | 2 | 1 | 2 | 2 | 2 |
| C-3 | 2 | 1 | 1 | 1 | 1 | 0 | 0 | 0 |
| C-5 | 2 | 0 | 1 | 1 | 1 | 1 | 2 | 2 |
| Fellow  eye | A-3 | 3 | 3 | 3 | 3 | 3 | 3 | 2 | 2 |
| B-1 | 3 | 2 | 2 | 2 | 2 | 2 | 3 | 3 |
| C-1 | 2 | 2 | 2 | 2 | 2 | 2 | 1 | 1 |
| C-2 | 2 | 2 | 2 | 1 | 1 | 1 | 1 | 1 |
| C-3 | 2 | 2 | 2 | 2 | 2 | 2 | 2 | 2 |
| C-5 | 0 | 0 | 0 | 0 | 0 | 0 | 0 | 0 |

**Table S15. Corneal opacification following cultivated oral mucosal epithelial cell sheet transplantation**

| Eye | Patient | Preoperative | 2 weeks | 4 weeks | 12 weeks | 24 weeks | 52 weeks | 78 weeks | 104 weeks |
| --- | --- | --- | --- | --- | --- | --- | --- | --- | --- |
| Operated  eye | A-3 | 3 | 3 | 3 | 3 | 3 | 3 | 3 | 3 |
| B-1 | 3 | 3 | 3 | 3 | 3 | 3 | 3 | 3 |
| C-1 | 3 | 0 | 1 | 2 | 3 | 3 | 3 | 3 |
| C-2 | 3 | 1 | 1 | 1 | 1 | 1 | 1 | 1 |
| C-3 | 3 | 0 | 1 | 1 | 1 | 1 | 1 | 0 |
| C-5 | 3 | 0 | 0 | 1 | 1 | 1 | 2 | 2 |
| Fellow  eye | A-3 | 3 | 3 | 3 | 3 | 3 | 3 | 3 | 3 |
| B-1 | 3 | 3 | 3 | 3 | 3 | 3 | 3 | 3 |
| C-1 | 3 | 3 | 3 | 3 | 3 | 3 | 3 | 3 |
| C-2 | 1 | 1 | 2 | 2 | 2 | 1 | 2 | 2 |
| C-3 | 3 | 3 | 2 | 3 | 2 | 2 | 2 | 3 |
| C-5 | 1 | 0 | 0 | 1 | 0 | 1 | 0 | 1 |

**Table S16. Corneal neovascularization following cultivated oral mucosal epithelial cell sheet transplantation**

| Eye | Patient | Preoperative | 2 weeks | 4 weeks | 12 weeks | 24 weeks | 52 weeks | 78 weeks | 104 weeks |
| --- | --- | --- | --- | --- | --- | --- | --- | --- | --- |
| Operated  eye | A-3 | 0 | 0 | 0 | 0 | 0 | 0 | 0 | 0 |
| B-1 | 1 | 1 | 1 | 1 | 1 | 1 | 1 | 1 |
| C-1 | 0 | 0 | 0 | 0 | 0 | 0 | 0 | 0 |
| C-2 | 1 | 0 | 0 | 1 | 0 | 1 | 1 | 1 |
| C-3 | 0 | 0 | 0 | 0 | 0 | 0 | 0 | 0 |
| C-5 | 1 | 0 | 0 | 1 | 1 | 1 | 1 | 1 |
| Fellow  eye | A-3 | 0 | 0 | 0 | 0 | 0 | 0 | 0 | 0 |
| B-1 | 1 | 1 | 1 | 1 | 1 | 1 | 1 | 1 |
| C-1 | 0 | 0 | 0 | 0 | 0 | 0 | 0 | 0 |
| C-2 | 0 | 0 | 0 | 0 | 0 | 1 | 0 | 0 |
| C-3 | 0 | 0 | 0 | 0 | 0 | 0 | 0 | 0 |
| C-5 | 1 | 1 | 1 | 1 | 1 | 1 | 1 | 1 |

**Table S17. Symblepharon following cultivated oral mucosal epithelial cell sheet transplantation**

| Primary SOC | PT | Number of subjects | Incidence (%) |
| --- | --- | --- | --- |
| Musculoskeletal and connective tissue disorders | Arthralgia | 1 | 16.7% |

**Table S18. Adverse events during the observation period after tissue collection**

SOC: System Organ Class, PT: Preferred Term

| Regist-ration number | Onset site | Number of adverse events | Type of  adverse event | Adverse event PT | Onset date | Time from biopsy to onset  (days) | Severity | Seriousness | Outcome date  (outcome) | Duration (days) | Causality  (tissue collection/  investigational product) |
| --- | --- | --- | --- | --- | --- | --- | --- | --- | --- | --- | --- |
| C-2 | Other than the eyes | 04 | Arthralgia | Arthralgia | 2015/10/16 | 23 | Grade1 | Non-serious | 2015/10/17  (Recovery) | 2 | Can be denied /  Can be denied |

**Table S19. Adverse events after tissue collection during the observation period for each patient**

PT: Preferred Term

**Table S20. Adverse events during the treatment period**

| Primary SOC | PT | Number of subjects | Incidence (%) |
| --- | --- | --- | --- |
| Infections and infestations | Dacryocystitis | 1 | 16.7% |
|  | Cellulitis | 1 | 16.7% |
|  | Herpes zoster | 1 | 16.7% |
|  | Nasopharyngitis | 1 | 16.7% |
|  | Tinea pedis | 1 | 16.7% |
| Eye disorders | Cataract | 1 | 16.7% |
|  | Chalazion | 1 | 16.7% |
|  | Corneal epithelium defect | 6 | 100.0% |
|  | Corneal opacity | 1 | 16.7% |
|  | Eye pain | 3 | 50.0% |
|  | Ocular hypertension | 1 | 16.7% |
|  | Punctate keratitis | 1 | 16.7% |
|  | Corneal neovascularisation | 3 | 50.0% |
| Metabolic and nutritional disorders | Diabetes mellitus | 1 | 16.7% |
| Nervous system disorders | Headache | 1 | 16.7% |
| Gastrointestinal disorders | Constipation | 1 | 16.7% |
|  | Gastrointestinal disorder | 1 | 16.7% |
|  | Proctitis | 1 | 16.7% |
|  | Toothache | 1 | 16.7% |
|  | Vomiting | 1 | 16.7% |
| Skin and subcutaneous tissue disorders | Pruritus | 1 | 16.7% |
|  | Rash | 2 | 33.3% |
| Investigations | Alanine aminotransferase increased | 1 | 16.7% |
|  | Bone density decreased | 1 | 16.7% |

SOC: System Organ Class, PT: Preferred Term

**Table S21. Adverse events after tissue collection during the treatment period for each patient**

| Regist-ration number | Onset site | Test classification | Adverse Event  Physician Listed  Name | Adverse event  Preferred Term | Onset date | Time from biopsy to onset  (days) | Severity | Seriousness | Outcome date  (outcome) | Duration (days) | Causality (tissue collection/ investigational　product) |
| --- | --- | --- | --- | --- | --- | --- | --- | --- | --- | --- | --- |
| A-3 | Operated eye | S1 | Corneal epithelium defect | Corneal epithelium defect | 2016/03/29 | 12 | Mild | Non-serious | 2016/08/31  (Recovery) | 156 | Can be denied/  Cannot be denied |
|  | Fellow eye | S1 | Corneal epithelium defect | Corneal epithelium defect | 2016/06/15 | 90 | Mild | Non-serious | 2016/08/31  (Recovery) | 78 | Can be denied/ Can be denied |
|  | Other than the eyes | S1 | Tinea pedis | Tinea pedis | 2016/10/14 | 211 | Grade 2 | Non-serious | - (Unrecovered) | - | Can be denied/ Can be denied |
|  | Other than the eyes | S1 | Cellulitis of leg | Cellulitis | 2016/10/09 | 206 | Grade 3 | Serious | 2016/11/02  (Recovery) | 25 | Can be denied/ Can be denied |
|  | Other than the eyes | S2 | Herpes zoster | Herpes zoster | 2017/04/07 | 386 | Grade 2 | Non-serious | 2017/05/18  (Recovery) | 42 | Can be denied/ Can be denied |
|  | Other than the eyes | S2 | Diabetes mellitus | Diabetes mellitus | 2018/02/10 | 695 | Grade 2 | Non-serious | - (Unrecovered) | - | Can be denied/ Can be denied |
| B-1 | Operated eye | S1 | Corneal epithelium defect | Corneal epithelium defect | 2016/03/16 | 86 | Mild | Non-serious | 2016/04/18  (Recovery) | 34 | Can be denied/  Cannot be denied |
|  | Operated eye | S1 | Corneal epithelium defect | Corneal epithelium defect | 2016/10/05 | 289 | Mild | Non-serious | 2016/12/15  (Recovery) | 72 | Can be denied/  Cannot be denied |
|  | Operated eye | S1 | Corneal opacity | Corneal opacity | 2016/11/02 | 317 | Mild | Non-serious | 2016/12/07  (Recovery) | 36 | Can be denied/  Cannot be denied |
|  | Operated eye | S1 | Corneal opacity | Corneal opacity | 2016/03/16 | 86 | Mild | Non-serious | 2016/04/18  (Recovery) | 34 | Can be denied/  Cannot be denied |
|  | Operated eye | S2 | Chalazion | Chalazion | 2017/09/25 | 644 | Mild | Non-serious | 2017/11/06  (Recovery) | 43 | Can be denied/ Can be denied |
|  | Other than the eyes | S2 | Skin eruption | Rash | 2017/10/03 | 652 | Grade 1 | Non-serious | 2017/11/06  (Remission) | 35 | Can be denied/ Can be denied |
| C-1 | Operated eye | S1 | Corneal epithelium defect | Corneal epithelium defect | 2015/12/28 | 54 | Mild | Non-serious | 2016/03/28  (Recovery) | 92 | Can be denied/  Cannot be denied |
|  | Operated eye | S1 | Ocular hypertension | Ocular hypertension | 2016/04/22 | 170 | Mild | Non-serious | 2016/09/23  (Recovery) | 155 | Can be denied/ Can be denied |
|  | Other than the eyes | S1 | ALT increased | Alanine aminotransferase increased | 2015/11/19 | 15 | Grade 2 | Non-serious | 2015/12/28  (Recovery) | 40 | Can be denied/ Can be denied |

**Table S21. *Continued***

| Regist-ration number | Onset site | Test classification | Adverse Event  Physician Listed  Name | Adverse event  Preferred Term | Onset date | Time from biopsy to onset  (days) | Severity | Seriousness | Outcome date  (outcome) | Duration (days) | Causality (tissue collection/ investigational　product) |
| --- | --- | --- | --- | --- | --- | --- | --- | --- | --- | --- | --- |
| C-1 | Operated eye | S1 | Corneal neovascularisation | Corneal neovascularisation | 2015/12/04 | 30 | Mild | Non-serious | -(Unrecovered) | - | Can be denied/  Cannot be denied |
|  | Fellow eye | S1 | Dacryocystitis | Dacryocystitis | 2016/07/19 | 258 | Severe | Serious | 2016/07/23  (Recovery) | 5 | Can be denied/ Can be denied |
|  | Operated eye | S1 | Corneal epithelium defect | Corneal epithelium defect | 2016/08/01 | 271 | Mild | Non-serious | 2016/11/18  (Remission) | 110 | Can be denied/  Cannot be denied |
|  | Other than the eyes | S1 | Bone density decreased | Bone density decreased | 2016/03/15 | 132 | Grade 2 | Non-serious | -(Unrecovered) | - | Can be denied/ Can be denied |
|  | Operated eye | S1 | Eye pain | Eye pain | 2015/11/20 | 16 | Mild | Non-serious | 2016/04/22  (Recovery) | 155 | Can be denied/ Can be denied |
|  | Operated eye | S2 | Eye pain | Eye pain | 2017/05/12 | 555 | Mild | Non-serious | -(Unrecovered) | - | Can be denied/ Can be denied |
|  | Fellow eye | S2 | Corneal epithelium defect | Corneal epithelium defect | 2017/01/10 | 433 | Mild | Non-serious | 2017/01/16  (Recovery) | 7 | Can be denied/ Can be denied |
|  | Operated eye | S2 | Ocular hypertension | Ocular hypertension | 2017/09/25 | 691 | Mild | Non-serious | 2017/11/10  (Remission) | 47 | Can be denied/ Can be denied |
| C-2 | Fellow eye | S1 | Corneal epithelium defect | Corneal epithelium defect | 2015/12/11 | 16 | Mild | Non-serious | 2015/12/25  (Recovery) | 15 | Can be denied/ Can be denied |
|  | Operated eye | S1 | Corneal epithelium defect | Corneal epithelium defect | 2015/12/25 | 30 | Mild | Non-serious | 2016/01/08  (Recovery) | 15 | Can be denied/  Cannot be denied |
|  | Operated eye | S1 | Eye pain | Eye pain | 2015/11/26 | 1 | Mild | Non-serious | 2015/11/27  (Recovery) | 2 | Can be denied/ Can be denied |
|  | Fellow eye | S1 | Corneal epithelium defect | Corneal epithelium defect | 2016/02/26 | 93 | Mild | Non-serious | 2016/04/15  (Recovery) | 50 | Can be denied/ Can be denied |
|  | Fellow eye | S1 | Corneal epithelium defect | Corneal epithelium defect | 2016/10/28 | 338 | Mild | Non-serious | -(Unrecovered) | - | Can be denied/ Can be denied |
|  | Operated eye | S2 | Eye pain | Eye pain | 2017/05/19 | 541 | Mild | Non-serious | -(Unrecovered) | - | Can be denied/ Can be denied |
|  | Fellow eye | S2 | Eye pain | Eye pain | 2017/05/19 | 541 | Mild | Non-serious | 2017/10/27  (Recovery) | 162 | Can be denied/ Can be denied |
|  | Fellow eye | S2 | Corneal epithelium defect | Corneal epithelium defect | 2017/10/27 | 702 | Mild | Non-serious | -(Unrecovered) | - | Can be denied/ Can be denied |

**Table S21. *Continued***

| Regist-ration number | Onset site | Test classification | Adverse Event  Physician Listed  Name | Adverse event  Preferred Term | Onset date | Time from biopsy to onset  (days) | Severity | Seriousness | Outcome date  (outcome) | Duration (days) | Causality (tissue collection/ investigational　product) |
| --- | --- | --- | --- | --- | --- | --- | --- | --- | --- | --- | --- |
| C-3 | Other than the eyes | S1 | Vomiting | Vomiting | 2015/12/17 | 1 | Grade 1 | Non-serious | 2015/12/17  (Recovery) | 1 | Can be denied/ Can be denied |
|  | Operated eye | S1 | Corneal epithelium defect | Corneal epithelium defect | 2016/02/15 | 61 | Mild | Non-serious | 2016/03/14  (Recovery) | 29 | Can be denied/ Can be denied |
|  | Fellow eye | S1 | Corneal epithelium defect | Corneal epithelium defect | 2016/12/02 | 352 | Mild | Non-serious | -(Unrecovered) | - | Can be denied/ Can be denied |
|  | Operated eye | S1 | Eye pain | Eye pain | 2016/01/15 | 30 | Mild | Non-serious | 2016/02/15  (Recovery) | 32 | Can be denied/ Can be denied |
|  | Operated eye | S1 | Corneal neovascularisation | Corneal neovascularisation | 2016/01/15 | 30 | Mild | Non-serious | -(Unrecovered) | - | Can be denied/  Cannot be denied |
|  | Other than the eyes | S1 | Skin eruption | Rash | 2015/12/17 | 1 | Grade 1 | Non-serious | 2015/12/17  (Recovery) | 1 | Can be denied/ Can be denied |
|  | Fellow eye | S2 | Corneal epithelium defect | Corneal epithelium defect | 2017/05/15 | 516 | Mild | Non-serious | 2017/05/22  (Recovery) | 8 | Can be denied/ Can be denied |
|  | Fellow eye | S2 | Corneal epithelium defect | Corneal epithelium defect | 2017/06/16 | 548 | Mild | Non-serious | 2017/08/25  (Recovery) | 71 | Can be denied/ Can be denied |
|  | Operated eye | S2 | Eye pain | Eye pain | 2017/06/16 | 548 | Mild | Non-serious | (Unrecovered) | - | Can be denied/ Can be denied |
|  | Operated eye | S2 | Superficial punctate keratopathy | Punctate keratitis | 2017/06/16 | 548 | Mild | Non-serious | 2017/08/25  (Recovery) | 71 | Can be denied/  Cannot be denied |
|  | Operated eye | S2 | Corneal epithelium defect | Corneal epithelium defect | 2017/08/25 | 618 | Mild | Non-serious | 2017/10/20  (Recovery) | 57 | Can be denied/  Cannot be denied |
|  | Fellow eye | S2 | Corneal epithelium defect | Corneal epithelium defect | 2017/09/29 | 653 | Mild | Non-serious | 2017/10/06  (Recovery) | 8 | Can be denied/ Can be denied |
|  | Fellow eye | S2 | Corneal epithelium defect | Corneal epithelium defect | 2017/11/17 | 702 | Mild | Non-serious | 2017/12/15  (Remission) | 29 | Can be denied/ Can be denied |
|  | Operated eye | S2 | Superficial punctate keratopathy | Punctate keratitis | 2017/10/20 | 674 | Mild | Non-serious | 2017/12/15  (Remission) | 57 | Can be denied/  Cannot be denied |
| C-5 | Operated eye | S1 | Corneal epithelium defect | Corneal epithelium defect | 2016/11/01 | 27 | Mild | Non-serious | 2016/11/21  (Recovery) | 21 | Can be denied/  Cannot be denied |
|  | Other than the eyes | S1 | Headache | Headache | 2016/10/06 | 1 | Grade 2 | Non-serious | 2016/10/06  (Recovery) | 1 | Can be denied/ Can be denied |

**Table S21. *Continued***

| Regist-ration number | Onset site | Test classification | Adverse Event  Physician Listed  Name | Adverse event  Preferred Term | Onset date | Time from biopsy to onset  (days) | Severity | Seriousness | Outcome date  (outcome) | Duration (days) | Causality (tissue collection/ investigational　product) |
| --- | --- | --- | --- | --- | --- | --- | --- | --- | --- | --- | --- |
| C-5 | Other than the eyes | S1 | Gastrointestinal disorder | Gastrointestinal disorder | 2017/01/05 | 92 | Grade 2 | Non-serious | 2017/01/06  (Recovery) | 2 | Can be denied/ Can be denied |
|  | Fellow eye | S1 | Cataract aggravated | Cataract | 2017/06/05 | 243 | Moderate | Non-serious | -(Unrecovered) | - | Can be denied/ Can be denied |
|  | Other than the eyes | S1 | Constipation | Constipation | 2016/10/21 | 16 | Grade 1 | Non-serious | 2016/10/21  (Recovery) | 1 | Can be denied/ Can be denied |
|  | Operated eye | S1 | Corneal neovascularisation | Corneal neovascularisation | 2017/01/12 | 99 | Mild | Non-serious | -(Unrecovered) | - | Can be denied/  Cannot be denied |
|  | Operated eye | S1 | Corneal epithelium defect | Corneal epithelium defect | 2017/07/10 | 278 | Mild | Non-serious | 2017/08/07  (Recovery) | 29 | Can be denied/  Cannot be denied |
|  | Other than the eyes | S1 | Pruritus | Pruritus | 2017/02/13 | 131 | Grade 1 | Non-serious | 2017/07/10  (Recovery) | 148 | Can be denied/ Can be denied |
|  | Other than the eyes | S1 | Periproctitis | Proctitis | 2017/07/04 | 272 | Grade 2 | Non-serious | 2017/07/18  (Recovery) | 15 | Can be denied/ Can be denied |
|  | Fellow eye | S2 | Cataract aggravated | Cataract | 2017/09/11 | 341 | Moderate | Serious | 2017/09/20  (Recovery) | 10 | Can be denied/ Can be denied |
|  | Other than the eyes | S2 | Toothache | Toothache | 2017/09/18 | 348 | Grade 2 | Non-serious | 2017/09/22  (Recovery) | 5 | Can be denied/ Can be denied |
|  | Operated eye | S2 | Corneal epithelium defect | Corneal epithelium defect | 2017/10/06 | 366 | Mild | Non-serious | 2017/12/01  (Recovery) | 57 | Can be denied/  Cannot be denied |
|  | Other than the eyes | S2 | Common cold | Nasopharyngitis | 2018/01/10 | 462 | Grade 2 | Non-serious | 2018/01/14  (Recovery) | 5 | Can be denied/ Can be denied |
|  | Operated eye | S2 | Corneal epithelium defect | Corneal epithelium defect | 2018/06/08 | 611 | Mild | Non-serious | 2018/08/17  (Recovery) | 71 | Can be denied/  Cannot be denied |
|  | Other than the eyes | S2 | Common cold | Nasopharyngitis | 2018/07/19 | 652 | Grade 2 | Non-serious | 2018/07/24  (Recovery) | 6 | Can be denied/ Can be denied |

Test classification: COMET01 Trial (S1), COMET01-FU Trial (S2)

**SUPPLEMENTARY APPENDIX FOR CLINICAL STUDY**

**TITLE**

**Prospective multicenter clinical study of autologous cultivated oral mucosal epithelial cell sheet transplantation for patients with limbal stem cell deficiency**

**METHODS**

**Study oversight**

This clinical study is a prospective multicenter open-label, uncontrolled, single arm design for the purpose of confirming efficacy and safety of this treatment. Study protocol was approved by institutional review boards of Osaka university hospital, Tohoku University hospital, Tokyo University hospital, Ehime University hospital. And it was also approved by the Minister of Health, Labor, and Welfare in Japan after a review by the Committee on Science and Technology of Health Sciences Council.

Written informed consent was obtained from all patients. The study was conducted according to tenets of Declaration of Helsinki. Clinical researches were registered as UMIN000005400 in Osaka University, UMIN000006745 in Tohoku University, UMIN000012260 in Tokyo University, UMIN000012264 in Ehime University. This study was conducted from 2011 February 10th to 2016 December 6th.

**Study protocol**

Patients with limbal stem cell deficiency of stage III were included in this study. [1] LSCD was diagnosed by conjunctival pannus under slit-lamp examination with fluorescein staining. {Deng, 2019 #2920} Exclusion criteria included patients who are or may be pregnant, breast feeding, patients with infections, patients with severe dry eye, and patients with severe oral mucosal scar formation. Patients were followed up for two years. (For details, see PROTOCOL FOR CLINICAL STUDY) Primary endpoint was ocular surface reconstruction defined by corneal area ratio without conjunctivalization or epithelial defect at postoperative 1 year. (endpoint for efficacy) It was evaluated by the onsite ophthalmologists based on 6 grading as follows; 0:x=0%, 1:0%≤x≤10%, 2:10≤x≤25%, 3:25%≤x≤50%, 4:50%≤x≤75%, 5:75%≤x≤100%. Preoperative grading for all eyes was 5 because stage III means 100% corneal surface was covered by the conjunctiva. And improvement at postoperative one year to grading 2 or better was considered as effective.

Secondary endpoints were evaluated as follows. Decimal corrected distance visual acuity was converted into LogMAR (logarithm of the minimum angle of resolution) values, and improvement more than 2 lines was regarded as significant (endpoint for efficacy). Corneal opacification and neovascularization were graded 0 to 3 [2], and improvement of one or more grade was considered as significant (endpoint for efficacy). Expected ocular complications included corneal keratinization, conjunctival hyperemia, symblepharon formation, superficial punctate keratopathy, corneal epithelial defect, conjunctivalization, subjective symptom (ocular pain, foreign body sensation, lacrimation, photophobia), infectious keratitis, endophthalmitis, and neoplastic proliferation (endpoint for safety). All adverse events including abnormal laboratory findings were firstly rated evaluated in accordance with the “National Cancer Institute-Common Terminology Criteria for Adverse Events (NCI-CTCAE) (Japanese translation JCOG version) version 4.0, and eventually evaluated after conversion into Medical Dictionary for Regulatory Activities (MedDRA) /J verion18.1. (endpoint for safety)

**Cell culture and evaluation of cultivated oral mucosal epithelial cell sheet**

Autologous oral mucosal epithelial cells obtained from patient’s own cheek biopsy specimen (5mm x 10mm) were cultivated on temperature responsive culture surface of 3.5 cm diameter as previously reported. [3] Virus validated lethally irradiated 3T3-J2 cells from established working cell bank were used as feeder layers. All cell sheets were fabricated in GMP-grade facility under established standard operating procedures (SOPs). All procedures were guided and recorded under process management system. Cell sheets were evaluated under defined shipment criteria before transplantation, and only cell sheets that meet the criteria were used for transplantation (Table S22). Colony forming efficiency (CFE) for primary culture was also evaluated.

**Transportation of tissue and cell sheet**

For patients in Osaka University hospital, Tokyo University hospital, Ehime University hospital, cell sheets were cultivated in GMP-facility in Osaka University. For patients in Tohoku University, cell sheets were cultured in Tohoku University. Therefore, oral mucosal tissue and cultivated oral mucosal epithelial cell sheets for patients in Tokyo and Ehime University hospitals were transported from Osaka University to each institute via airplane using transportation technique as previously reported. [4] Briefly, tissue was transported around 6 degree Celsius, cell sheets around 35 degree Celsius using a dedicated container. Temperature and air pressure inside the container were monitored recorded during transportation.

**Cell sheet transplantation and post-operative procedures**

One cell sheet was transplanted in each surgery as previously reported. [5] [6] Briefly, Conjunctival and subconjunctival scar tissue on the cornea were excised to expose bare corneal stroma up to 3 mm outside the limbus. Then, one harvested cell sheet was transplanted to the patient corneal stroma directly, and therapeutic soft contact lens was place on the cornea to protect ocular surface. Although simultaneous keratoplasty was not performed with cell sheet transplantation, penetrating or anterior lamellar keratoplasty was performed to recover corneal transparency in patients with corneal stromal scarring one year or more after cell sheet transplantation if necessary.

Postoperative local medication included topical antibiotics (0.5% cefmenoxime) and corticosteroids (0.1% betamethasone) four times a day, and betamethasone and fradiomycin ointment once a day. Betamethasone eye drop was converted to 0.1% fluorometholone three to six months after surgery depending on patient’s inflammation. Systemic steroid was administered as 125mg methylprednisolone surgery day, 2mg betamethasone for two days, 1mg betamethasone for one month with tapering. Because some patients were complicated with severe dry eye, artificial tears were also used to promote wound healing according to patient’s condition.

**RESULTS**

**Characteristics of the patients**

26 eyes of 26 patients were assessed for eligibility. However, three patients were excluded before biopsy: one was positive for HTLV-1 (exclusion criteria), one withdrew the consent, and one discontinued because of severe systemic complication. Additionally, seeded oral mucosal cells from one patient did not grow enough for evaluation based on shipment criteria two times. Therefore, the research for the patient was terminated. Thus, 22 eyes of 22 patients with LSCD of stage III received COMET surgery in this clinical study. Eight patients were enrolled in Osaka University hospital, six in Tohoku University hospital, four each in Ehime University hospital and Tokyo University hospital.

The mean age of the enrolled patients was 55.1±13.6 years (Median: 52, range from 33 to 88). 13 males and 9 females were included. LSCD was caused by chemical burns in 8 patients (7 alkali and 1 acid), Stevens-Johnson syndrome in 5, ocular cicatricial pemphigoid in 2, thermal burn in 2, idiopathic in 2, graft versus host disease in 1, Sjogren syndrome in 1, aniridia in 1. The mean value of Schirmer’s test was 12.3±9.2mm at 5 minutes. Eight patients had a history of previous allogeneic limbal transplantation, but all failed and returned to LSCD.

**Cultivation and transplantation of oral mucosal epithelial cell sheet**

Oral mucosal biopsy was obtained from 23 patients. Seeded cells from one patient did not grow enough for evaluation based on shipment criteria two times. Although one each patient experienced second biopsy because of contamination during cultivation or lack of fulfillment for shipment criteria, cultivated epithelial cell sheets were successfully obtained from the second biopsy. Thus, cell sheets from 22 patients were successfully cultivated, and met defined shipment criteria for cultivated cell, and thus were used for transplantation. (Table S23) 14 patients in Osaka and Tohoku University hospitals received cell sheets cultivated in their own institute, and 8 patients in Tokyo and Ehime University hospitals received cell sheets cultured in Osaka University hospital via transportation. Temperature and air pressure were stable, and showed no abnormal rapid change that indicated breakage of container during transportation. All surgical procedures were successfully carried out. Eight eyes of 8 patients with corneal stromal scarring underwent keratoplasty to recover corneal transparency 12 to 24 months after COMET. Seven patients underwent penetrating keratoplasty, and one underwent deep lamellar anterior keratoplasty.

**Endpoints for efficacy and safety**

Primary endpoint, ocular surface reconstruction one year after COMET achieved in all of 22 eyes (85-100%; 95% confidence interval). 20 eyes (90.9%) were graded as 5, 1 eye (4.5%) as 4, and 1 eye (4.5%) as 2. The results of grading were shown in Table S24. Ocular surface status was maintained in a preferable condition over 1 year follow up period.

Visual acuity improved in 10 eyes (45.5%) at postoperative 1 month, 9 eyes (40.9%) at 3 months, 10 eyes (45.5%) at 6 months, 11 eyes (50.0%) at 12 months, 12 eyes (54.4%) at 18 months, 14 eyes (63.6%) at 24 months. Corneal opacification improved in 14 eyes (63.6%) at postoperative 2 weeks, 15 eyes (68.2%) at 1 month, 13 eyes (59.1%) at 3 months, 12 eyes (50%) at 6 months, 12 eyes (50%) at 12 months, 16 eyes (72.7%) at 18 months, 14 eyes (63.6%) at 24 months. Corneal neovascularization was improved in 17 eyes (77.3%) at postoperative 2 weeks, 18 eyes (81.8%) at 1 month, 18 eyes (81.8%) at 3 months, 17 eyes (77.3%) at 6 months, 15 eyes (68.2%) at 12 months, 16 eyes (72.7%) at 18 months, 15 eyes (68.2%) at 24 months. Actual visual acuity and gradings for corneal opacification and neovascularization were shown in Tables S25-27.

As for expected ocular complications, corneal keratinization was observed in 1 eye (4.5%), conjunctival hyperemia in 19 eyes (86.4%), symblepharon formation in 5 eyes (22.7%), superficial punctate keratopathy in 14 eyes (63.6%), corneal epithelial defect in 20 eyes (90.9%), conjunctivalization in 11 eyes (50%), eye pain in 14 eyes (63.6%), foreign body sensation in 10 eyes (45.5%), lacrimation in 9 eyes (40.9%), photophobia in 10 eyes (45.5%), corneal infection in 1 eye (4.5%), endophthalmitis in 0 eye (0%), neoplastic proliferation in 0 eye (0%). 5 serious adverse events (SAE) were reported due to hospitalization or prolongation of existing hospitalization: elevated intraocular pressure in the operated eye and fellow eye, cataract in the operated eye, corneal epithelial defect in the operated eye, encephalorrhagia (Table S28). Although ocular SAEs can be related protocol treatment in this study, all were successfully treated without permanent damage. Other adverse events were shown in Table S29. All of the adverse events were temporal or recovered without subsequent complications.

**TABLES**

**Table S22. Defined shipment criteria for cultivated cell sheet**

Items evaluation criteria

1) Phase contrast microscopy cobble stone-like cell morphology

2) Cell sheet harvest harvest without break

3) Total cell number 1x10^5 or more

4) Viability (flow cytometric analysis) 60% or more 7-AAD negative cells

5) Epithelial purity (flow cytometric analysis) 80% or more keratin positive cells

6) Stratification 2 layers or more

7) Stem/progenitor cells p63 positive cells in basal layer

8) Differentiated cells K3/76 positive cells in cell sheet

9) Barrier function ZO-1, MUC16 positive cells in superficial layer

10) Infection

(1) Endotoxin test less than 1.0EU/ml

(2) Sterility test (culture) negative

(3) Mycoplasma test (PCR) negative

**Table S23. Shipping inspection for the cultivated cell sheets**

Cultivation Cell Total cell Epithelial

Patient Institution period recovery test　 number(x106) Viability(%) purity(%) p63 AE5 ZO-1 MUC16 CFE

01-02 Osaka University 14 possible 1.51 81.5 84 + + + + 3.9

01-03 Osaka University 12 possible 1.56 90.1 89.1 + + + + 5.4

01-04 Osaka University 12 possible 1.89 95.6 89.1 + + + + 3

01-05 Osaka University 12 possible 1.26 75 98.6 + + + + 0.96

01-06 Osaka University 12 possible 2.02 88.7 98.2 + + + + 2.2

01-07 Osaka University 12 possible 1.47 61.9 94.6 + + + + 0.4

01-08 Osaka University 16 possible 1.25 75.9 98.3 + + + + 0.28

01-11 Osaka University 14 possible 1.08 79.9 96.1 + + + + 0.26

02-01 Tohoku University 17 possible 2.26 72.3 84.5 + + + + 0.6

02-02 Tohoku University 13 possible 1.08 74.4 80.2 + + + + 1.3

02-03 Tohoku University 13 possible 1.46 80.4 81.5 + + + + 2.2

02-04 Tohoku University 13 possible 1.67 71.7 80.6 + + + + 1.2

02-05 Tohoku University 13 possible 1.18 83.5 81.1 + + + + 0.9

02-07 Tohoku University 13 possible 1.5 80.3 83.3 + + + + 1.2

03-01 Tokyo University 14 possible 1.35 82.8 98.6 + + + + 0.64

03-03 Tokyo University 14 possible 1.46 78.8 98.5 + + + + 0.47

03-04 Tokyo University 14 possible 2.09 80.8 97.3 + + + + 0.5

03-05 Tokyo University 14 possible 1.43 78.2 88.4 + + + + 0.28

**Table S23. *Continued***

cultivation cell total cell epithelial

patient institution period recovery test　 number(x106) viability(%) purity(%) p63 AE5 ZO-1 MUC16 CFE

04-01 Ehime University 14 possible 1.25 70.1 96.7 + + + + 0.4

04-02 Ehime University 14 possible 1.35 77.2 96.6 + + + + 2.1

04-03 Ehime University 14 possible 1 87.7 98.5 + + + + 1.1

04-04 Ehime University 14 possible 2.01 79.9 98.5 + + + + 1.27

| Institution | Patient | Age | Gender | Causative disease | Grading | | | | | |
| --- | --- | --- | --- | --- | --- | --- | --- | --- | --- | --- |
| Preoperative | 2 weeks | 1 month | 3 months | 6 months | 1 year |
| Osaka University | 01-02 | 80 | F | MMP | 0 | 5 | 5 | 5 | 5 | 5 |
| 01-03 | 36 | F | Idiopathic | 0 | 5 | 5 | 5 | 5 | 5 |
| 01-04 | 75 | M | Alkali burn | 0 | 5 | 5 | 5 | 5 | 5 |
| 01-05 | 52 | F | SJS | 0 | 5 | 5 | 5 | 5 | 5 |
| 01-06 | 48 | M | Idiopathic | 0 | 5 | 5 | 5 | 5 | 5 |
| 01-07 | 42 | M | Alkali burn | 0 | 5 | 5 | 5 | 5 | 5 |
| 01-08 | 64 | F | SJS | 0 | 5 | 4 | 5 | 5 | 5 |
| 01-10 | 52 | M | Thermal burn | 0 | 5 | 5 | 5 | 5 | 4 |
| Tohoku University hospital | 02-01 | 36 | M | Alkali burn | 0 | 5 | 5 | 5 | 5 | 5 |
| 02-02 | 70 | F | SJS | 0 | 3 | 2 | 5 | 5 | 5 |
| 02-03 | 63 | F | Sjogren's syndrome | 0 | 5 | 5 | 5 | 5 | 2 |
| 02-04 | 52 | F | SJS | 0 | 5 | 5 | 5 | 5 | 5 |
| 02-05 | 48 | M | Alkali burn | 0 | 5 | 5 | 5 | 5 | 5 |
| 02-07 | 33 | M | Thermal burn | 0 | 5 | 5 | 5 | 5 | 5 |
| Tokyo University hospital | 03-01 | 53 | M | Acid burn | 0 | 2 | 4 | 5 | 5 | 5 |
| 03-03 | 78 | F | MMP | 0 | 1 | 4 | 5 | 5 | 5 |
| 03-04 | 45 | M | Alkali burn | 0 | 5 | 5 | 5 | 5 | 5 |
| 03-05 | 65 | F | SJS | 0 | 4 | 4 | 5 | 4 | 4 |
| Ehime University hospital | 04-01 | 45 | M | Alkali burn | 0 | 5 | 5 | 5 | 5 | 5 |
| 04-02 | 66 | M | Alkali burn | 0 | 4 | 4 | 5 | 5 | 5 |
| 04-03 | 59 | M | aniridia | 0 | 5 | 5 | 5 | 5 | 5 |
| 04-04 | 50 | M | GVHD | 0 | 5 | 5 | 5 | 5 | 5 |

**Table S24. Evaluation of conjunctivalization and corneal epithelial defect in cornea (primary endpoint)**

MMP: mucous membrane ocular cicatricial pemphigoid, SJS: Stevens-Johnson syndrome

**Table S25. Decimal visual acuity following cultivated oral mucosal epithelial transplantation**

| Institution | Patient | Age | Gender | Causative disease | Pre  operative | 2 weeks | 1 month | 3 months | 6 months | 1 year | 1 year  6 months | 2 years |
| --- | --- | --- | --- | --- | --- | --- | --- | --- | --- | --- | --- | --- |
| Osaka University | 01-02 | 80 | F | MMP | 0.01 | 0.2 | 0.15 | 0.15 | 0.4 | 0.15 | 0.2 | 0.01 |
| 01-03 | 36 | F | Idiopathic | 0.01 | 0.03 | 0.04 | 0.15 | 0.09 | 0.03 | 0.03 | 0.01 |
| 01-04 | 75 | M | Alkali burn | 0.02 | 0.4 | 0.4 | 0.15 | 0.4 | 0.15 | 0.4 | 0.02 |
| 01-05 | 52 | F | SJS | 0.03 | 0.03 | 0.04 | 0.02 | 0.01 | 0.02 | 0.02 | 0.03 |
| 01-06 | 48 | M | Idiopathic | 0.01 | 0.01 | 0.01 | 0.01 | 0.01 | 0.15 | 0.15 | 0.01 |
| 01-07 | 42 | M | Alkali burn | 0.002 | 0.002 | 0.005 | 0.001 | 0.002 | 0.001 | 0.001 | 0.002 |
| 01-08 | 64 | F | SJS | 0.03 | 0.02 | 0.05 | 0.2 | 0.06 | 0.04 | 0.03 | 0.03 |
| 01-10 | 52 | M | Thermal burn | 0.002 | 0.002 | 0.002 | 0.002 | 0.002 | 0.04 | 0.15 | 0.002 |
| Tohoku University hospital | 02-01 | 36 | M | Alkali burn | 0.01 | 0.04 | 0.005 | 0.005 | 0.04 | 0.03 | 0.03 | 0.01 |
| 02-02 | 70 | F | SJS | 0.03 | 0.01 | 0.01 | 0.02 | 0.06 | 0.03 | 0.002 | 0.03 |
| 02-03 | 63 | F | Sjogren's syndrome | 0.001 | 0.001 | 0.001 | 0.001 | 0.001 | 0.001 | 0.001 | 0.001 |
| 02-04 | 52 | F | SJS | 0.08 | 0.15 | 0.09 | 0.15 | 0.2 | 0.04 | 0.4 | 0.08 |
| 02-05 | 48 | M | Alkali burn | 0.002 | 0.005 | 0.002 | 0.002 | 0.002 | 0.002 | 0.002 | 0.002 |
| 02-07 | 33 | M | Thermal burn | 0.002 | 0.01 | 0.01 | 0.02 | 0.02 | 0.02 | 0.01 | 0.002 |
| Tokyo University hospital | 03-01 | 53 | M | Acid burn | 0.03 | 0.04 | 0.03 | 0.02 | 0.02 | 0.5 | 0.3 | 0.03 |
| 03-03 | 78 | F | MMP | 0.01 | 0.07 | 0.03 | 0.01 | 0.03 | 0.06 | 0.05 | 0.01 |
| 03-04 | 45 | M | Alkali burn | 0.02 | 0.03 | 0.05 | 0.05 | 0.05 | 0.15 | 0.09 | 0.02 |
| 03-05 | 65 | F | SJS | 0.02 | 0.2 | 0.4 | 0.15 | 0.2 | 0.04 | 0.06 | 0.02 |
| Ehime University hospital | 04-01 | 45 | M | Alkali burn | 0.002 | 0.002 | 0.002 | 0.001 | 0.001 | 0.001 | 0.005 | 0.002 |
| 04-02 | 66 | M | Alkali burn | 0.04 | 0.005 | 0.02 | 0.04 | 0.05 | 0.5 | 0.7 | 0.04 |
| 04-03 | 59 | M | aniridia | 0.05 | 0.07 | 0.07 | 0.15 | 0.07 | 0.07 | 0.07 | 0.05 |
| 04-04 | 50 | M | GVHD | 0.04 | 0.09 | 0.05 | 0.5 | 0.02 | 0.01 | 0.01 | 0.04 |

MMP: mucous membrane ocular cicatricial pemphigoid, SJS: Stevens-Johnson syndrome

**Table S26. Corneal opacification following cultivated oral mucosal epithelial transplantation**

| Institution | Patient | Age | Gender | Causative disease | Pre  operative | 2 weeks | 1 month | 3 months | 6 months | 1 year | 1 year  6 months | 2 years |
| --- | --- | --- | --- | --- | --- | --- | --- | --- | --- | --- | --- | --- |
| Osaka University | 01-02 | 80 | F | MMP | 2 | 0 | 0 | 0 | 1 | 1 | 1 | 1 |
| 01-03 | 36 | F | Idiopathic | 2 | 1 | 1 | 1 | 1 | 2 | 1 | 2 |
| 01-04 | 75 | M | Alkali burn | 2 | 1 | 0 | 1 | 1 | 1 | 1 | 1 |
| 01-05 | 52 | F | SJS | 2 | 1 | 1 | 1 | 1 | 1 | 1 | 2 |
| 01-06 | 48 | M | Idiopathic | 3 | 3 | 3 | 3 | 3 | 3 | 0 | 1 |
| 01-07 | 42 | M | Alkali burn | 3 | 2 | 2 | 3 | 3 | 2 | 1 | 1 |
| 01-08 | 64 | F | SJS | 2 | 1 | 1 | 1 | 1 | 1 | 1 | 1 |
| 01-10 | 52 | M | Thermal burn | 3 | 3 | 3 | 3 | 3 | 3 | 1 | 1 |
| Tohoku University hospital | 02-01 | 36 | M | Alkali burn | 2 | 1 | 1 | 1 | 1 | 1 | 1 | 1 |
| 02-02 | 70 | F | SJS | 2 | 2 | 1 | 1 | 1 | 1 | 1 | 1 |
| 02-03 | 63 | F | Sjogren's syndrome | 2 | 2 | 2 | 2 | 2 | 2 | 2 | 2 |
| 02-04 | 52 | F | SJS | 2 | 1 | 1 | 1 | 1 | 1 | 2 | 2 |
| 02-05 | 48 | M | Alkali burn | 3 | 3 | 3 | 3 | 3 | 3 | 3 | 3 |
| 02-07 | 33 | M | Thermal burn | 2 | 2 | 2 | 2 | 2 | 2 | 2 | 2 |
| Tokyo University hospital | 03-01 | 53 | M | Acid burn | 2 | 1 | 1 | 2 | 2 | 2 | 0 | 0 |
| 03-03 | 78 | F | MMP | 2 | 1 | 1 | 1 | 2 | 2 | 1 | 1 |
| 03-04 | 45 | M | Alkali burn | 2 | 1 | 1 | 1 | 2 | 2 | 0 | 1 |
| 03-05 | 65 | F | SJS | 1 | 1 | 1 | 1 | 1 | 1 | 1 | 1 |
| Ehime University hospital | 04-01 | 45 | M | Alkali burn | 3 | 2 | 2 | 2 | 2 | 2 | 2 | 0 |
| 04-02 | 66 | M | Alkali burn | 2 | 1 | 1 | 1 | 1 | 1 | 0 | 0 |
| 04-03 | 59 | M | aniridia | 2 | 0 | 0 | 0 | 0 | 0 | 0 | 0 |
| 04-04 | 50 | M | GVHD | 1 | 0 | 0 | 0 | 0 | 0 | 1 | 0 |

MMP: mucous membrane ocular cicatricial pemphigoid, SJS: Stevens-Johnson syndrome

**Table S27. Corneal neovascularization following cultivated oral mucosal epithelial transplantation**

| Institution | Patient | Age | Gender | Causative disease | Pre  operative | 2 weeks | 1 month | 3 months | 6 months | 1 year | 1 year  6 months | 2 years |
| --- | --- | --- | --- | --- | --- | --- | --- | --- | --- | --- | --- | --- |
| Osaka University | 01-02 | 80 | F | MMP | 3 | 0 | 0 | 0 | 1 | 2 | 2 | 2 |
| 01-03 | 36 | F | Idiopathic | 3 | 1 | 1 | 2 | 3 | 3 | 3 | 3 |
| 01-04 | 75 | M | Alkali burn | 3 | 0 | 1 | 1 | 2 | 1 | 2 | 1 |
| 01-05 | 52 | F | SJS | 3 | 1 | 1 | 1 | 1 | 3 | 3 | 3 |
| 01-06 | 48 | M | Idiopathic | 3 | 1 | 2 | 2 | 2 | 2 | 1 | 2 |
| 01-07 | 42 | M | Alkali burn | 3 | 0 | 1 | 1 | 2 | 2 | 2 | 1 |
| 01-08 | 64 | F | SJS | 3 | 0 | 1 | 1 | 1 | 1 | 1 | 1 |
| 01-10 | 52 | M | Thermal burn | 3 | 0 | 1 | 2 | 2 | 3 | 2 | 2 |
| Tohoku University hospital | 02-01 | 36 | M | Alkali burn | 3 | 3 | 3 | 3 | 3 | 3 | 3 | 3 |
| 02-02 | 70 | F | SJS | 3 | 3 | 3 | 3 | 3 | 3 | 3 | 3 |
| 02-03 | 63 | F | Sjogren's syndrome | 3 | 1 | 1 | 1 | 1 | 1 | 2 | 2 |
| 02-04 | 52 | F | SJS | 2 | 2 | 1 | 1 | 1 | 1 | 1 | 1 |
| 02-05 | 48 | M | Alkali burn | 2 | 3 | 3 | 3 | 3 | 3 | 3 | 3 |
| 02-07 | 33 | M | Thermal burn | 3 | 3 | 3 | 3 | 3 | 3 | 3 | 3 |
| Tokyo University hospital | 03-01 | 53 | M | Acid burn | 2 | 1 | 1 | 1 | 1 | 1 | 1 | 0 |
| 03-03 | 78 | F | MMP | 2 | 0 | 0 | 0 | 1 | 1 | 1 | 1 |
| 03-04 | 45 | M | Alkali burn | 2 | 0 | 0 | 0 | 0 | 0 | 1 | 1 |
| 03-05 | 65 | F | SJS | 3 | 0 | 0 | 1 | 1 | 1 | 1 | 1 |
| Ehime University hospital | 04-01 | 45 | M | Alkali burn | 3 | 0 | 0 | 1 | 1 | 2 | 2 | 0 |
| 04-02 | 66 | M | Alkali burn | 3 | 0 | 0 | 0 | 0 | 0 | 0 | 0 |
| 04-03 | 59 | M | aniridia | 3 | 0 | 0 | 0 | 0 | 0 | 0 | 1 |
| 04-04 | 50 | M | GVHD | 2 | 0 | 0 | 0 | 0 | 1 | 1 | 2 |

MMP: mucous membrane ocular cicatricial pemphigoid, SJS: Stevens-Johnson syndrome

**Table S28. Serious adverse events**

SOC PT eye relation treatment outcome

Eye disorders Cataract operated eye possibly related cataract surgery cured

investigations Intraocular pressure increased operated eye possibly related trabeculotomy cured

investigations Intraocular pressure increased fellow eye possibly related trabeculotomy remitted

Nervous system disorders Haemorrhage intracranial - not related preservation therapy cured

Eye disorders Corneal epithelial defect operated eye related AMT cured

AMT: amniotic membrane transplantation

**Table S29. Adverse events**

SOC PT cases proportion(%)

Gastrointestinal disorders Nausea 2 9.1

Salivary gland cyst 1 4.5

Noninfective gingivitis 1 4.5

Abdominal pain 1 4.5

Constipation 2 9.1

Vomiting 1 4.5

Inguinal hernia 1 4.5

General disorders and administration site conditions Eye complication associated with device (dropout of therapeutic9 40.9

soft contact lens)

Malaise 1 4.5

Localised oedema 1 4.5

Pyrexia 1 4.5

Fatigue 1 4.5

Infections and infestations Tracheitis 1 4.5

Upper respiratory tract infection 3 13.6

Otitis media 1 4.5

Nasopharyngitis 3 13.6

**Table S29. *Continued***

SOC PT cases proportion(%)

Infections and infestations Tracheitis 1 4.5

Upper respiratory tract infection 3 13.6

Otitis media 1 4.5

Nasopharyngitis 3 13.6

Rhinitis 1 4.5

Sinusitis 1 4.5

Eye disorders Macular oedema 1 4.5

Entropion 1 4.5

Optic disc haemorrhage 1 4.5

Cataract 4 18.2

Musculoskeletal and connective tissue disorders Back pain 1 4.5

Respiratory, thoracic and mediastinal disorders Oropharyngeal pain 1 4.5

Nasal inflammation 1 4.5

Ear and labyrinth disorders Ear pain 1 4.5

Injury, poisoning and procedural complications Lip injury 1 4.5

Procedural pain 2 9.1

**Table S29. *Continued***

SOC PT cases Proportion(%)

Nervous system disorders Paraesthesia 2 9.1

Haemorrhage intracranial 1 4.5

Headache 1 4.5

Dizziness 1 4.5

Renal and urinary disorders Urethral haemorrhage 1 4.5

Psychiatric disorders Insomnia 2 9.1

Metabolism and nutrition disorders Hypoglycaemia 1 4.5

Diabetes mellitus 1 4.5

Skin and subcutaneous tissue disorders Acne 1 4.5

Immune system disorders Corneal graft rejection (following keratoplasty) 2 9.1

Investigations Aspartate aminotransferase increased 2 9.1

Alanine aminotransferase increased 3 13.6

Intraocular pressure increased 9 40.9

Eosinophil count increased 1 4.5

White blood cell count increased 1 4.5

SOC: System Organ Class

PT: Preferred terms

**References**

1. Deng SX, Borderie V, Chan CC et al: Global Consensus on Definition, Classification, Diagnosis, and Staging of Limbal Stem Cell Deficiency. *Cornea* 2019;38:364-375.

2. Sotozono C, Ang LP, Koizumi N et al: New grading system for the evaluation of chronic ocular manifestations in patients with Stevens-Johnson syndrome. *Ophthalmology* 2007;114:1294-1302.

3. Oie Y, Nishida K: Translational research on ocular surface reconstruction using oral mucosal epithelial cell sheets. *Cornea* 2014;33 Suppl 11:S47-52.

4. Oie Y, Nozaki T, Takayanagi H et al: Development of a cell sheet transportation technique for regenerative medicine. *Tissue engineering Part C, Methods* 2014;20:373-382.

5. Nishida K, Yamato M, Hayashida Y et al: Corneal reconstruction with tissue-engineered cell sheets composed of autologous oral mucosal epithelium. *The New England journal of medicine* 2004;351:1187-1196.

6. Oie Y, Sugita S, Yokokura S et al: Clinical Trial of Autologous Cultivated Limbal Epithelial Cell Sheet Transplantation for Patients with Limbal Stem Cell Deficiency. *Ophthalmology* 2023.
