# Supplementary material
Source: Research Square preprint supplement (doi:10.21203/rs.3.rs-7181420/v1)
Supplement: Supplementary file 2 [file 103012fa07a33a5f71963334.docx]

Statistical Analysis Plan

| Clinical trial title | Long-term follow-up of the multicenter investigator-initiated clinical trial using cultivated autologous oral mucosal epithelial cell sheet (COMET01) transplantation for patients with limbal stem-cell deficiency |
| --- | --- |
| Protocol number | J-TEC- COMET01-FU |

| Prepared by | Japan Tissue Engineering Co., Ltd.  Clinical Development Department  Norichika Matsuki Yosuke Nakatsu Hiroki Hashimoto |
| --- | --- |
| Preparation date | August 29, 2018 |
| Version | 1.1 |

| Person responsible for statistical analysis  Approved by | Japan Tissue Engineering Co., Ltd.  Clinical Development Department  Norichika Matsuki  Confirmation date: August 29, 2018 (mm/dd/yyyy) |
| --- | --- |
| Person responsible for clinical trial  Approved by | Japan Tissue Engineering Co., Ltd.  Clinical Development Department  Masami Suzuki  Confirmation date: August 29, 2018 (mm/dd/yyyy) |
| Trial general manager  Approved by | Japan Tissue Engineering Co., Ltd.  Clinical Development Department  Shigeaki Hayashi  Confirmation date: August 29, 2018 (mm/dd/yyyy) |

| J-TEC CONFIDENTIAL  The information included in this document is owned by Japan Tissue Engineering Co., Ltd., and it is prohibited to disclose this information to a third party irrelevant to the concerned clinical trial without prior written approval from Japan Tissue Engineering Co., Ltd. |
| --- |

Revision history

| Version | Preparation date | Prepared by | Reason of revision |
| --- | --- | --- | --- |
| 1.0 | April 21, 2017 | Masashi Noguchi  Yosuke Nakatsu | Newly created |
| 1.1 | August 29, 2018 | Norichika Matsuki  Yosuke Nakatsu  Hiroki Hashimoto | Added tables and listings, corrected erroneous descriptions, and fixed |

Table of contents

[I. Summary of Statistical Analysis Plan 1](#_Toc186117059)

[1. Objectives 1](#_Toc186117060)

[2. Definitions of terms/abbreviations 1](#_Toc186117061)

[3. Outline of the protocol (excerpt) 4](#_Toc186117062)

[4. Outline of statistical analyses 5](#_Toc186117063)

[5. Patient/data handling 9](#_Toc186117064)

[5.1. Analysis set 9](#_Toc186117065)

[5.2. Handling of missing values 9](#_Toc186117066)

[5.3. Handling of evaluation values from multiple evaluators 9](#_Toc186117067)

[5.4. Scope of observation/test days 9](#_Toc186117068)

[5.5. Data derivation 10](#_Toc186117069)

[5.6. Categorization of continuous variables 12](#_Toc186117070)

[5.7. Definitions related to data output 13](#_Toc186117071)

[II. Details of Statistical Analysis Plan 15](#_Toc186117072)

[1. Status of clinical trial conduction 15](#_Toc186117073)

[1.1. Breakdown of patients 15](#_Toc186117074)

[1.2. Breakdown of discontinuation/dropout 15](#_Toc186117075)

[1.3. Deviation from the protocol 16](#_Toc186117076)

[2. Efficacy evaluation 16](#_Toc186117077)

[2.1. Analyzed dataset 16](#_Toc186117078)

[2.2. Demographic and other baseline characteristics 17](#_Toc186117079)

[2.3. Treatment status 18](#_Toc186117080)

[2.4. Concomitant drugs/therapies 19](#_Toc186117081)

[2.4.1. Concomitant drugs 19](#_Toc186117082)

[2.4.2. Concomitant therapies 19](#_Toc186117083)

[2.5. Efficacy endpoint analysis 20](#_Toc186117084)

[2.5.1. Success rate of corneal epithelium reconstruction in Post-transplant Week 104 (%) 20](#_Toc186117085)

[2.5.2. Limbal stem cell deficiency severity classification 21](#_Toc186117086)

[2.5.3. Subjective symptoms 23](#_Toc186117087)

[2.5.4. Variation of corrected visual acuity 23](#_Toc186117088)

[2.5.5. QOL evaluation 25](#_Toc186117089)

[2.5.6. Extent of corneal opacity 27](#_Toc186117090)

[2.5.7. Extent of corneal neovascularization 27](#_Toc186117091)

[2.5.8. Extent of symblepharon 28](#_Toc186117092)

[2.5.9. Additional treatment 28](#_Toc186117093)

[3. Safety evaluation 29](#_Toc186117094)

[3.1. Brief summary of adverse events 29](#_Toc186117095)

[3.2. Conversion of adverse events 30](#_Toc186117096)

[3.3. Important malfunctions 30](#_Toc186117097)

[3.4. Tabulation of ocular topical adverse events 31](#_Toc186117098)

[3.4.1. Causality of ocular topical adverse events 31](#_Toc186117099)

[3.4.2. Severity of ocular topical adverse events 32](#_Toc186117100)

[3.4.3. Seriousness of ocular topical adverse events 32](#_Toc186117101)

[3.4.4. Onset time of ocular topical adverse events 32](#_Toc186117102)

[3.5. Tabulation of non-ocular topical adverse events 33](#_Toc186117103)

[3.5.1. Causality of non-ocular topical adverse events 33](#_Toc186117104)

[3.5.2. Severity of non-ocular topical adverse events 33](#_Toc186117105)

[3.5.3. Seriousness of non-ocular topical adverse events 34](#_Toc186117106)

[3.5.4. Onset time of non-ocular topical adverse events 34](#_Toc186117107)

[3.6. Ocular topical adverse events by stratified factor 35](#_Toc186117108)

[3.7. Non-ocular topical adverse events by stratified factor 36](#_Toc186117109)

[3.8. Adverse event list 37](#_Toc186117110)

[3.9. Laboratory test 38](#_Toc186117111)

[4. List of tables, listings, and figures 40](#_Toc186117112)

# Summary of Statistical Analysis Plan

## Objectives

| This plan document stipulates the details of the statistical analysis plan of “A long-term trial extended from a multicenter trial of cultivated autologous oral mucosal epithelial cell sheet COMET01 in patients with limbal stem cell deficiency (protocol number: J-TEC- COMET01-FU)” (hereinafter referred to as this trial).  The details of the statistical analyses based on the protocol are described in this document. |
| --- |

## Definitions of terms/abbreviations

| Term/abbreviation | Description/definition |
| --- | --- |
| CTCAE/JCOG | Common Terminology Criteria for Adverse Events  Japanese translation JCOG version |
| MedDRA/J | Medical Dictionary for Regulatory Activities Terminology/J  Japanese version of ICH Medical Dictionary for Regulatory Activities |
| LLT | Lowest Level Term of MedDRA/J |
| PT | Preferred Term of MedDRA/J |
| SOC | System Organ Class of MedDRA/J  With some exceptions, primary SOCs will be assigned based on chief onset sites or organs. |
| ETDRS | Early Treatment Diabetic Retinopathy Study: Corrected visual acuity measured in the visual acuity table used in (early treatment of diabetic retinopathy) |
| LogMAR | Logarithm of Minimum Angle of Resolution: Regular logarithm of the minimum separation threshold viewing angle (minutes) |
| NEI VFQ-25 Japanese version | The 25-Item National Eye Institute Visual Function Questionnaire Japanese version |
| OCP | Ocular Pemphigoid |
| SJS | Stevens-Johnson Syndrome |
| Limbal stem cell deficiency severity classification | Stage I: Conjunctivalization is absent in the central cornea (diameter 5 mm), and the limbus is in the following conditions.  A: Conjunctivalization: <50%  B: Conjunctivalization: ≥50% and <100%  C: Conjunctivalization: 100%  Stage II: Conjunctivalization is present in the central cornea (diameter 5 mm), and the limbus is in the following conditions.  A: Conjunctivalization: <50%  B: Conjunctivalization: ≥50% and <100%  Stage III: The corneal surface is entirely covered by conjunctival tissues. |
| Adverse event | Adverse events are any undesirable unintended signs (including abnormal laboratory values), symptoms, and diseases regardless of causal relationship with the investigational product.  In this trial, the events of Grade ≥1 in CTCAE v4.0, or a standard for judging the severity of adverse events, are defined as adverse events, and will be collected. However, for ocular topical events, their severity will be evaluated on a 3-point scale (mild, moderate, and severe), and those evaluated as mild or more severe than mild is defined as adverse events and will be collected.  Moreover, the complications that occurred before consent acquisition of "Multicenter joint physician-initiate clinical trial (clinical trial plan number: OUH-COMET01)" (hereinafter referred to as "COMET01 clinical trial") of cultivated autologous oral mucosal epithelial cell sheet COMET01 for LSCD and were aggravated during the trial period are also defined as adverse events and will be collected.  When an event recurred after it disappeared once, or when the event that occurred during the observation period got more serious during the treatment period, it will be handled as a new adverse event. |
| Malfunction | The adverse events whose causal relationship with the investigational product is judged as undeniable are defined as malfunctions. |
| Serious adverse event | Serious adverse events are defined as the adverse events meeting any of the following conditions.  Resulting in death  Life-threatening The term “life-threatening” here means the case in which the subject is in danger of death at the onset time of the concerned event, but it does not mean that the event might result in death if it were more serious.  Requiring hospitalization or prolongation of hospitalization for treatment  Resulting in persistent or marked disorder/dysfunction  Causing congenital abnormality or congenital defect  Other events and responses judged as medically important conditions The term “other events and responses judged as medically important conditions” here means the important medical events that possibly make the subjects in danger or require procedures or treatments not to result in the conditions listed in the definitions, even though they do not threaten lives or result in death or hospitalization right now. |
| Important malfunction | The following items, or the risks specific to cell/tissue processed products, will be investigated.  Onsets of neoplastic lesions in the transplantation sites of the investigational product with undeniable causal relationships with the investigational product  Onsets of allergic symptoms with undeniable causal relationships with the investigational product  Onsets of unknown infectious diseases of unknown causes with undeniable causal relationships with the investigational product |
| Treatment period | 104 weeks from transplantation, discontinuation date, or the period leading up to the end date of the follow-up of adverse events. |
| J-TEC-COMET01-FU clinical trial period | The period from the end date of the 52nd week of transplantation to the 104th week of transplantation or the end date of follow-up investigation of the discontinuation date or adverse events. |
| Evaluation complete | At each evaluation point after transplantation, the severity classification of LSCD of the transplanted eye is evaluated by the investigator. |
| Evaluation not complete | At each evaluation point after transplantation, the severity classification of LSCD of the transplanted eye is not evaluated by the investigator. |
| Summary statistics | Defined as the number of patients (or cases), mean, median, standard deviation, minimum, maximum |
| QOL final evaluation | QOL evaluation at the end of the 52nd and 104th weeks after transplantation, the date of additional treatment, and the date of discontinuation. |

## Outline of the protocol (excerpt)

| | Objectives of the trial  The purpose of this trial is to confirm the long-term efficacy and safety in patients who have been transplanted to COMET01 (hereinafter referred to as "clinical trial products") among cases registered in the COMET01 clinical trial. | | --- | | Disease studied  Limbal stem cell deficiency | | Inclusion criteria/exclusion criteria  Patients who satisfy the inclusion criteria and none of exclusion criteria listed as follows are eligible for the trial:  Inclusion criteria:  1) Patients enrolled in the COMET01 clinical trial and transplanted with the investigational product  Exclusion criteria:  1) Patients who have a schedule to participate in another clinical trial during participation in the present trial  2) Women who want to be pregnant during the trial period  3) Other patients who are not eligible for the trial, in the opinion of the investigator/co-investigator | | Trial design  Multicenter, open-label, non-controlled trial | | Procedure and time of informed consent  Procedure  Written informed consent is obtained from patients themselves  Time of informed consent  Before start of examination and observation at Week 52 after transplantation of the investigational product in the COMET01 clinical trial | | Concomitant medication/therapy  For medication used during the trial period, the name of the drug, administration route, and period and purpose of the medication should be documented in the case report form. For therapy used concomitantly during the trial period, the name of the therapy, and period and purpose of the therapy should be documented in the case report form. | | Non-proprietary name of the investigational product  cultivated autologous oral mucosal epithelial cell sheet (to be determined) | | Items and time of examination and observation  Examination and observation are performed according to the schedule of examination and observation, respectively. | | Endpoints  Efficacy  1) Severity of LSCD at Week 104 after transplantation of the investigational product  2) Severity of LSCD after transplantation of the investigational product  3) Subjective symptoms  4) Corrected visual acuity  5) QOL  6) Severity of corneal opacity  7) Severity of corneal neovascularization  8) Severity of symblepharon  9) Contribution to restoration of the corneal surface in subjects who received additional treatment  10) Severity of LSCD, subjective symptoms, corrected vision, degree of corneal opacity, degree of corneal neovascularization and degree of symblepharon in the fellow eye.  Safety  1) Adverse events and malfunctions: the number of subjects and incidence (%)  2) Important malfunctions: the number of subjects and incidence (%) | | Target sample size  Same as the number of patients enrolled in the COMET01 clinical trial and transplanted with the investigational product | | Trial period  From October 1, 2016 to December 31, 2018 | | Good clinical practice (GCP) inspection  GCP inspection is applicable to this clinical trial. | |
| --- | --- | --- | --- | --- | --- | --- | --- | --- | --- | --- | --- | --- |

## Outline of statistical analyses

| Item | Outline |
| --- | --- |
| Positioning of statistical analyses | The Statistical Analysis Report prepared from the results of the statistical analyses performed based on this plan document will be a source document for the Clinical Study Report of this trial and the marketing approval application form. |
| Positioning of the fellow eye | Since the background of the fellow eye is targeted at the case where the background of the fellow eye is different from that of the target eye, the fellow eye is not a strict self-control, but only refers to the data and analysis results. |
| Tabulation of concomitant drugs | Tabulation will be conducted by using the first 3 (hereafter, medicinal effect classification code) and 7(hereafter, generic name code) digits of the YJ code of Japan Pharmaceutical Information Center Ethical/Non-prescription Drug Formulary (hereafter, JAPIC). |
| Tabulation of concomitant therapies | Tabulated by using LLT and PT of MedDRA/J.  However, for the therapies for which MedDRA/J code does not exist, the company-specific code issued by DM section will be used. |
| Data annexation of COMET01 clinical trial and this trial | Statistical analysis on long-term efficacy and safety in transplanted patients will be conducted by combining patient background, efficacy after transplantation, safety data and clinical trial data. |
| Analysis of the items related to efficacy endpoints | 1. Success rate of corneal epithelium reconstruction at 104 weeks after transplantation of the investigational product (%)    - 1. Patients with successful corneal epithelium reconstruction are defined as the success rate of corneal epithelium reconstruction (%).      2. For the patients for whom corneal epithelium reconstruction was judged as successful at 104 weeks after transplantation of the investigational product, the ratio of those patients will be calculated by the presence of successful corneal epithelium reconstruction at 52 weeks after transplantation of the investigational product. 2. Severity of LSCD after transplantation of the investigational product   The severity for each evaluation point is shown in the line graph, and the frequency (ratio) of the severity is summarized for each point.  Both target and fellow eyes are performed   1. Subjective symptoms   The severity for each evaluation point is shown in the line graph, and the frequency (ratio) of the severity is summarized for each point.  Both target and fellow eyes are performed   1. Corrected visual acuity   Values measured using the Landolt ring chart  ... Decimal visual acuity will be converted into LogMAR, and its summary statistics will be calculated for each evaluation time point, as well as graphically showing its variation from baseline (the value on the screening day) in a line plot for each evaluation time point.  Both target and fellow eyes are performed  Values measured using the ETDRS chart  ... As well as graphically showing variation from baseline (the value on the screening day) in a line plot for each actual evaluation time point (weeks), its summary statistics will be calculated for each evaluation time point.  Both target and fellow eyes are performed   1. QOL evaluation   The total scores on the screening day, in Post-transplant Weeks 52 and 104, and at the final evaluation time will be calculated, and their summary statistics will be calculated. Furthermore, for cases in which additional treatment was performed, the overall score is calculated for the screening day, the 52nd week of clinical trial product transplantation, the 104th week of transplantation, the additional treatment implementation day (before execution) and the day of discontinuation, and the summary statistics are calculated.   1. Extent of corneal opacity   The severity for each evaluation point is shown in the line graph, and the frequency (ratio) of the severity is summarized for each point.  Both target and fellow eyes are performed   1. Extent of corneal neovascularization   The severity for each evaluation point is shown in the line graph, and the frequency (ratio) of the severity is summarized for each point.  Both target and fellow eyes are performed   1. Extent of symblepharon   The severity for each evaluation point is shown in the line graph, and the frequency (ratio) of the severity is summarized for each point.  Both target and fellow eyes are performed   1. Contribution to corneal epithelium reconstruction in patients receiving additional treatment   The number and proportion of cases are calculated according to the presence or absence of additional treatment and the contribution to corneal epithelial reconstruction. |
| Analysis on adverse events and malfunctions | By using PT and Primary SOC of MedDRA/J, the patients in whom adverse events occurred will be tabulated and incidence rates (%) will be calculated by causality, severity, and seriousness, by onset time. The patients in whom malfunctions occurred will be analyzed in the same manner  In addition, ocular topical adverse events and malfunctions will be handled separately from the other adverse events and malfunctions.  The observation period of the aggregation is carried out in two periods: The J-TEC-COMET01-FU clinical trial period and the treatment period. |
| Analysis on important malfunctions | Onsets of neoplastic lesions in the transplantation sites of the investigational product with undeniable causal relationships with the investigational product  For each severity, the cases expressed in the J-TEC-COMET01-FU clinical trial period and the treatment period of the event are aggregated, and the 95% confidence interval on both sides of the incidence rate (%), is calculated.  Onsets of allergic symptoms with undeniable causal relationships with the investigational product  For each severity, the cases expressed in the J-TEC-COMET01-FU clinical trial period and the treatment period of the event are aggregated, and the 95% confidence interval on both sides of the incidence rate (%), is calculated.  Onsets of unknown infectious diseases of unknown causes with undeniable causal relationships with the investigational product  For each severity, the cases expressed in the J-TEC-COMET01-FU clinical trial period and the treatment period of the event are aggregated, and the 95% confidence interval on both sides of the incidence rate (%), is calculated. |
| Intentional level | Defined as two-sided 5%, unless otherwise specified |
| Confidence coefficient | Defined as two-sided 95%, unless otherwise specified |
| Confidence intervals of rates | Their two-sided confidence intervals will be exactly calculated using binomial distribution. |
| Adjustment for covariates | Not to be conducted in this trial |
| Interim analysis | For application of COMET01 approval, analyses will be performed based on the data accumulated by a certain time point during the trial period of this trial in some cases. |
| Investigation on subpopulations | Data will be stratified by pre-selected variables, and exploratory investigation will be conducted. |
| Differences between trial sites | Not to be investigated because some trial sites have an extremely small number of patients, although this trial is multicenter clinical trial. |
| Multiplicity | Multiplexing is not considered in this plan because multiple tests are not planned. |

## Patient/data handling

### Analysis set

| Population | Definition |
| --- | --- |
| Consent-acquired patients | Patients from whom written consent on participation in this trial was acquired. |
| Efficacy analysis set | Patients to whom the investigational product was transplanted. |
| Evaluation set for the response assessment committee | Defined as the patients who were diagnosed as Stage II B or III on limbal stem cell deficiency severity classification at screening by the response assessment committee among the efficacy analysis set. |
| Safety analysis set | Patients to whom the investigational product was transplanted. |

### Handling of missing values

| Missing values will not be interpolated. |
| --- |

### Handling of evaluation values from multiple evaluators

| Item | Handling |
| --- | --- |
| Limbal stem cell deficiency severity classification | Although evaluation values occur from up to three evaluators, or the attending physician (the principal investigator or sub investigator), eligibility judging committee, and effect judging committee, unless otherwise specified, the values evaluated by the eligibility judging committee will be used for evaluation on the screening day, and the values evaluated by the effect judging committee will be used for evaluation on each observation time point after transplantation. |

### Scope of observation/test days

| Date | Handling |
| --- | --- |
| Oral mucosal tissue collection day | Oral observation after collection is within +3 days from the date of collection |
| Transplantation day of investigational product | For anterior eye photography and pregnancy test (urine test) before transplantation, within -4 days of the transplant date |
| Post-transplant Week 2 | Within ±3 days from the specified day |
| Post-transplant Week 4 | Within ±3 days from the specified day |
| Post-transplant Week 12 | Within ±14 days from the specified day |
| Post-transplant Week 24 | Within ±14 days from the specified day |
| Post-transplant Week 52 | Within ±28 days from the specified day |
| 78 weeks after transplantation of the investigational product | Within ±28 days from the specified day |
| 104 weeks after transplantation of the investigational product | Within ±56 days from the specified day |
| Additional treatment conduction day (before conduction) | Within −35 days from the specified day |
| Follow-up end day | Conduction day |
| Discontinuation day | Within +35 days from the discontinuation day |

### Data derivation

| Item | Derivation |
| --- | --- |
| Success rate of corneal epithelium reconstruction in Post-transplant Week 104 | Successful corneal epithelium reconstruction is defined as being rated as Stage IA–IC on limbal stem cell deficiency severity classification at 104 weeks after transplantation of the investigational product. |
| QOL grade | The answer categories of each item will be converted into scores in accordance with the following rules.   | Item number | Original answer category | Score after conversion | | --- | --- | --- | | 1, 3, 4 | 1  2  3  4  5 | 100  75  50  25  0 | | 2 | 1  2  3  4  5  6 | 100  80  60  40  20  0 | | 15b-c | 1  2  3  4  5  6, 7 | 100  75  50  25  0  Missing value | | 5, 6, 7, 8, 9, 10, 11, 12, 13, 14, 16 | 1  2  3  4  5  6 | 100  75  50  25  0  Missing value | | 17, 18, 19, 20, 21, 22, 23, 24, 25 | 1  2  3  4  5 | 0  25  50  75  100 |   The score of each subscale will be obtained by calculating the mean score of each component item of the subscale in accordance with the following subscale classification. However, missing values will be excluded from the calculation of mean values. In addition, subscale scores will not be calculated for “general health” and “driving.”   | Subscale | Number of items | Item number | | --- | --- | --- | | General sense of well-being | 1 | 1 | | General vision | 1 | 2 | | Eye pain | 2 | 4, 19 | | Behavior depending on near vision | 3 | 5, 6, 7 | | Behavior depending on distant vision | 3 | 8, 9, 14 | | Social functioning depending on vision | 2 | 11, 13 | | Mental health depending on vision | 4 | 3, 21, 22, 25 | | Role functioning depending on vision | 2 | 17, 18 | | Self-sustainability depending on vision | 3 | 20, 23, 24 | | Driving | 2 | 15, 16 | | Color vision | 1 | 12 | | Peripheral vision | 1 | 10 |   QOL grades will be obtained by calculating the mean of the 10 subscales for which scores were obtained. |

### Categorization of continuous variables

| Item | Category |
| --- | --- |
| Age (years) category 1 | 1: <20  2: ≥20 and <30  3: ≥30 and <40  4: ≥40 and <50  5: ≥50 and <60  6: ≥60 and <70  7: ≥70 and <80  8: ≥80 |
| Age (years) category 2 | 1: <65  2: ≥65 |
| Age (years) category 3 | 1: <45  2: ≥45 |
| Direction of change in corrected vision | 1: Improved  2: Constant  3: Aggravated |
| Improvement rate of corrected visual acuity | 1: ≤−0.2  2: >−0.2 |
| Cause of injury | 1：SJS／OCP  2: Other than SJS/OCP |
| Onset time of adverse events/ malfunctions | Transplant date to week 2: Day 1 after transplantation - 14 days after transplantation  Weeks 3-4: 15 days after transplantation - 28 days after transplantation  Weeks 5-12: Days 29 after transplantation - 84 days after transplantation  Weeks 13-24: 85 days after transplantation - 168 days after transplantation  Weeks 25-52: 169 days after transplantation - 364 days after transplantation  Weeks 53-78: 365 days after transplantation - 546 days after transplantation  Week 79~: 547 days after transplantation~ |

### Definitions related to data output

| Item | Definition |
| --- | --- |
| Age (years) | Value on the consent acquisition day of the COMET01 clinical trial |
| Time to transplantation (days) | Transplantation day − tissue collection day + 1 |
| Observation duration (days) | Transplantation day − consent acquisition day |
| Treatment duration (days) | Post-transplant Week 104 or post-transplant discontinuation day − transplantation day + 1 |
| Time from the transplantation day (days) | Observation day − transplantation day + 1 |
| Time from the transplantation day (weeks) | Period from transplant date (days)/7  (Rounded to the second decimal place) |
| Time to discontinuation (days) | Discontinuation day − consent acquisition day + 1 |
| Time to adverse event onset (days) (treatment period) | Adverse event onset day − transplantation day + 1 |
| Adverse event duration (days) | When outcome is recovery or remission: Outcome day − adverse event onset day + 1  Other outcomes: Missing value |
| Significant digits of laboratory values | | Test item | Unit | Significant digits (the number of decimal places) | | --- | --- | --- | | Red blood cell count | ×106/μL | 2 | | White blood cell count | ×103/μL | 1 | | Differential leukocyte count_Neutrophil | % | 1 | | Differential leukocyte count_Eosinophil | % | 1 | | Differential leukocyte count_Basophil | % | 1 | | Differential leukocyte count_Lymphocyte | % | 1 | | Hemoglobin | g/dL | 1 | | Hematocrit | % | 1 | | Platelet count | ×104/μL | 1 | | AST (GOT) | U/L | 0 | | ALT (GPT) | U/L | 0 | | Serum total protein | g/dL | 1 | | Serum creatinine | mg/dL | 2 | | C-reactive protein (CRP) | mg/dL | 2 | |
| Significant digits of statistics | Mean, median: The number of the significant digits of actual measurement values + 1  Standard deviation: The number of the significant digits of actual measurement values + 2  Minimum, maximum: The number of the significant digits of actual measurement values  Confidence limits: The number of the significant digits of actual measurement values + 1  Ratios: Up to 1 decimal place in percent figures |
| Direction of change in corrected vision | 1: Improved->Corrected vision beyond baseline  2: Constant->Corrected vision equal to baseline  3: Aggravated->Corrected vision below baseline |

# Details of Statistical Analysis Plan

## Status of clinical trial conduction

### Breakdown of patients

| Analysis set | Consent-acquired patients and eligible patients |
| --- | --- |

| Item | Description |
| --- | --- |
| Breakdown of patients (Table 1.1) | - For consent-acquired patients, eligible patients and ineligible patients in this trial will be tabulated. - As for eligible patients, completed and not completed evaluation patients observed in Post-transplant Weeks 78 and 104 will be tabulated. |
| Patient list (Listing 1.1.1) | The following items will be shown in order of the enrollment code.   - Enrollment code - Name of trial site/department, sexuality, and age (years) - Transplanted eye and name of injury or disease causing limbal stem cell deficiency, severity classification of LSCD on screening date (evaluation of efficacy committee / evaluation of eligibility judgment committee / investigator) - Inclusion in/exclusion from populations: Efficacy Safety |
| List of ineligible patients (Listing 1.1.2) | The following items will be shown in order of the enrollment code.   - Enrollment code - Reason for ineligibility |

### Breakdown of discontinuation/dropout

| Analysis set | Consent-acquired patients |
| --- | --- |

| Item | Description |
| --- | --- |
| Breakdown of discontinuation (Table 1.2.1) | - For consent-acquired patients, patients who discontinued will be tabulated by reason for discontinuation. |
| Breakdown of discontinuation/dropout by trial site (Table 1.2.2) | - For consent-acquired patients, patients who discontinued will be tabulated by trial site and the reason for discontinuation. |
| List of patients who discontinued (Listing 1.2) | The following items will be shown in order of the enrollment code.   - Enrollment code - Reason for discontinuation - Background to discontinuation and response after discontinuation |

### Deviation from the protocol

| Analysis set | Consent-acquired patients |
| --- | --- |

| Item | Description |
| --- | --- |
| Deviation from the protocol by trial site (Table 1.3.1) | - For consent-acquired patients, patients with deviation will be tabulated by trial site and deviation item. |
| Handling of deviation from the protocol (Table 1.3.2) | - Inclusion in/exclusion from each analysis set will be shown for each deviation item with tabulation of the concerned patients. |
| List of patients with deviation from the protocol (Listing 1.3) | The following items will be shown in order of the enrollment code.   - Enrollment code - Deviation item (Detailed) |

## Efficacy evaluation

### Analyzed dataset

| Analysis set | Consent-acquired patients |
| --- | --- |

| Item | Description |
| --- | --- |
| Inclusion in/exclusion from the analysis set (Table 2.1) | - Inclusion in/exclusion from each analysis set will be tabulated. Patients excluded from each analysis set will be tabulated by reason for exclusion. |
| List of patients excluded from the efficacy analysis set (Listing 2.1.1)  List of patients excluded from the safety analysis set (Listing 2.1.2) | The following items will be shown in order of the enrollment code.   - Enrollment code - Reason for exclusion |

### Demographic and other baseline characteristics

| Analysis set | Efficacy analysis set, evaluation set for the response assessment committee, safety analysis set, and consent-acquired patients |
| --- | --- |

| Item | Description |
| --- | --- |
| Demographic and other baseline characteristics (Table 2.2) | The following items will be tabulated by category, and ratios will be calculated. For continuous data, summary statistics will be calculated.   - Sexuality - Age (years: categories 1, 2, and 3; summary statistics) - Name of causative injury or disease - Transplanted eye - Fellow eye - Presence of ocular complication (transplanted eye, fellow eye, and bilateral eyes) - Presence of non-ocular complication - Presence of past ocular disease (transplanted eye, opposite eye, and bilateral eyes) - Presence of past non-ocular disease - Presence of a history of ocular surgery (transplanted eye, opposite, and bilateral eyes) |
| List of patient backgrounds (Listing 2.2.1) | The following items will be shown in order of the enrollment code.   - Enrollment code - Sexuality - Age (years) - Name of causative injury or disease - Transplanted eye - Fellow eye - Presence of ocular complication (onset site) - Presence of non-ocular complication - Presence of past ocular disease (onset site) - Presence of past non-ocular disease - Presence of a history of ocular surgery (onset site) |
| List of complications (Listing 2.2.2) | The following items will be shown in order of the enrollment code.   - Enrollment code - Name of complication - Onset site - Severity/Grade |
| List of past diseases (Listing 2.2.3) | The following items will be shown in order of the enrollment code.   - Enrollment code - Name of past disease - Onset site |
| List of ocular surgery histories (Listing 2.2.4) | The following items will be shown in order of the enrollment code.   - Enrollment code - History of ocular surgery - Surgery site |

### Treatment status

| Analysis set | Efficacy analysis set, safety analysis set, and consent-acquired patients |
| --- | --- |

| Item | Description |
| --- | --- |
| Conduction status (duration) (Table 2.3) | For the following items, summary statistics will be calculated.   - Time to transplantation (days) |
| List of conduction status (Listing 2.3) | The following items will be shown in order of the enrollment code.   - Enrollment code - Tissue collection day - Transplantation day - Transplanted eye - Time to transplantation (days) - Observation duration (days) - Treatment duration (days) |

### Concomitant drugs/therapies

#### Concomitant drugs

| Analysis set | Consent-acquired patients |
| --- | --- |

| Item | Description |
| --- | --- |
| Conversion list of concomitant drugs (Table 2.4.1.1) | - The therapeutic categories, non-proprietary names, and brand names of concomitant drugs will be displayed. |
| Concomitant drug (treatment period) (Table 2.4.1.2) | - For concomitant drugs in the treatment period, patients using them will be tabulated by therapeutic category and non-proprietary name. |
| List of concomitant drugs (treatment period) (Listing 2.4.1) | The following items will be shown in order of the enrollment code.   - Enrollment code - Therapeutic category, non-proprietary name, brand name, dosing route, concomitant use site, concomitant use start date, concomitant use end date, and the purpose of concomitant use |

#### Concomitant therapies

| Analysis set | Efficacy analysis set, evaluation set for the response assessment committee, safety analysis set, and consent-acquired patients |
| --- | --- |

| Item | Description |
| --- | --- |
| Conversion list of concomitant therapies (Table 2.4.2.1) | - PTs, LLTs, and concomitant therapy names will be displayed.   However, for company-specific codes, their decodes will be output with a prefix “o-” to differentiate them from MedDRA codes. |
| Concomitant therapy (treatment period) (Table 2.4.2.2) | - For concomitant therapies in the treatment period, patients receiving them will be tabulated by PT and LLT.   However, for company-specific codes, their decodes will be output with a prefix “o-” to differentiate them from MedDRA codes. |
| List of concomitant therapies (treatment period) (Listing 2.4.2) | The following items will be shown in order of the enrollment code.   - Enrollment code - PT, LLT, therapy name, concomitant treatment site, concomitant treatment start date, concomitant treatment end date, and the purpose of concomitant treatment   However, for company-specific codes, their decodes will be output with a prefix “o-” to differentiate them from MedDRA codes. |

### Efficacy endpoint analysis

#### Success rate of corneal epithelium reconstruction in Post-transplant Week 104 (%)

| Analysis set | Efficacy analysis set |
| --- | --- |

| Item | Description |
| --- | --- |
| Success rate of corneal epithelium reconstruction in Post-transplant Week 104 (%)  (Table 2.5.1.1) | - The corneal epithelial reconstruction success rate (%) and the confidence interval at the 104th week of transplantation are calculated. Discontinued cases without evaluation at the 104th week of transplantation are included in the denominator. - The corneal epithelial reconstruction success rate (%) and the confidence interval at the 104th week of transplantation by the successful or not of corneal epithelial reconstruction at the 52nd week of transplantation are calculated. Discontinued cases without evaluation at the 104th week of transplantation are included in the denominator. |
| Success rate of corneal epithelium reconstruction in Post-transplant Week 104 (%) (evaluation by the investigator) (Table 2.5.1.2) | - The corneal epithelial reconstruction success rate (%) and the confidence interval at the 104th week of transplantation by the investigator evaluation are calculated. Discontinued cases without evaluation at the 104th week of transplantation are included in the denominator. - Patients with successful corneal epithelium reconstruction in Post-transplant Week 104 will be tabulated by successful/unsuccessful corneal epithelium reconstruction evaluated by the investigator in Post-transplant Week 52 and in total, and the confidence intervals of the success rates of corneal epithelium reconstruction will be calculated. Discontinued cases without evaluation at the 104th week of transplantation are included in the denominator. |

#### Limbal stem cell deficiency severity classification

| Analysis set | Efficacy analysis set and consent-acquired patients |
| --- | --- |

| Item | Description |
| --- | --- |
| Limbal stem cell deficiency severity classification by time point (Table 2.5.2.1) | - Limbal stem cell deficiency severity classification evaluated by the response assessment committee will be tabulated by evaluation time point (the screening day; Post-transplant Weeks 2, 4, 12, 24, 52, 78, and 104; and discontinuation day). However, the screening date of the transplanted eye shall use the Eligibility Determination Committee evaluation. - Both transplanted and fellow eyes will be tabulated. - At each evaluation point, if the severity classification of corneal epithelial stem cell exhaustion is not evaluated, it is recorded as unevaluable / data loss.   When limbal stem cell deficiency severity classification was not evaluated at an individual evaluation time point, it will be counted as unknown /data-missing |
| Limbal stem cell deficiency severity classification by time point (evaluation by the investigator) (Table 2.5.2.2) | - Limbal stem cell deficiency severity classification evaluated by the investigator will be tabulated by evaluation time point (the screening day; Post-transplant Weeks 2, 4, 12, 24, 52, 78, and 104; and discontinuation day). - Both target and fellow eyes are performed   When limbal stem cell deficiency severity classification was not evaluated at an individual evaluation time point, it will be counted as unknown /data missing. |
| Direction of change in limbal stem cell deficiency severity classification by time point (Table 2.5.2.3) | - The direction of change in limbal stem cell deficiency severity classification evaluated by the response assessment committee will be tabulated by evaluation time point (Post-transplant Weeks 2, 4, 12, 24, 52, 78, and 104; and discontinuation day). - Both target and fellow eyes are performed |
| Direction of change in limbal stem cell deficiency severity classification by time point (evaluation by the investigator)  (Table 2.5.2.4) | - The direction of change in limbal stem cell deficiency severity classification evaluated by the response assessment committee will be tabulated by evaluation time point (Post-transplant Weeks 2, 4, 12, 24, 52, 78, and 104; and discontinuation day). - Both target and fellow eyes are performed |
| List of limbal stem cell deficiency severity classification (Listing 2.5.2) | The following items will be shown in order of the enrollment code.   - Enrollment code - Inclusion in/exclusion from populations: efficacy and safety - Evaluation time point (the screening day of the COMET01 clinical trial; Post-transplant Weeks 2, 4, 12, 24, 52, 78, and 104; additional treatment conduction day; and discontinuation day) - Evaluation day and time from the transplantation day (days) - Limbal stem cell deficiency severity classification in transplanted eye (evaluation by the response assessment committee, eligibility evaluation committee [the screening day of the COMET01 clinical trial only], and investigator) - Limbal stem cell deficiency severity classification in fellow eye (evaluation by the response assessment committee and investigator) |
| Longitudinal change in limbal stem cell deficiency severity classification for each patient (Figure 2.5.2.1)  Longitudinal change in limbal stem cell deficiency severity classification for each patient (evaluation by the investigator)  (Figure 2.5.2.2) | - Limbal stem cell deficiency severity classification will be plotted separately from the transplanted eye and the fellow eye for each actual evaluation time point (the screening day; Post-transplant Weeks 2, 4, 12, 24, 52, 78, and 104; additional treatment conduction day (before conduction); and discontinuation day) (weeks), and a line plot will be graphically shown for each patient. |

#### Subjective symptoms

| Analysis set | Efficacy analysis set and consent-acquired patients |
| --- | --- |

| Item | Description |
| --- | --- |
| Direction of change in the severity of subjective symptoms by time point (Table 2.5.3) | - The direction of change in the severity of subjective symptoms will be tabulated by evaluation time point (Post-transplant Weeks 2, 4, 12, 24, 52, 78, and 104; additional treatment conduction day (before conduction); and discontinuation day). - Both target and fellow eyes are performed |
| Longitudinal change in subjective symptoms (Figures 2.5.3.1–2.5.3.6) | - The severity of subjective symptoms (eye pain, foreign body sensation, lacrimation, photophobia, dry sensation, and discomfort) will be plotted separately from the transplanted eye and the fellow eye for each actual observation time point (the screening day; Post-transplant Weeks 2, 4, 12, 24, 52, 78, and 104; additional treatment conduction day; and discontinuation day) (weeks), and a line plot will be graphically shown for each patient. |
| List of subjective symptoms (Listing 2.5.3) | The following items will be shown in order of the enrollment code.   - Enrollment code - Inclusion in/exclusion from populations: efficacy, effect judgment, and safety - Evaluation time point (the screening day of the COMET01 clinical trial; Post-transplant Weeks 2, 4, 12, 24, 52, 78, and 104; additional treatment conduction day; and discontinuation day) - Evaluation day and time from the transplantation day (days) - Severity of subjective symptoms in transplanted eye (eye pain, foreign body sensation, lacrimation, photophobia, dry sensation, and discomfort) - Severity of subjective symptoms in fellow eye (eye pain, foreign body sensation, lacrimation, photophobia, dry sensation, and discomfort) |

#### Variation of corrected visual acuity

| Analysis set | Efficacy analysis set and consent-acquired patients |
| --- | --- |

| Item | Description |
| --- | --- |
| Variation of corrected visual acuity (Landolt ring) by time point  (Table 2.5.4.1) | - Regarding the variation of LogMAR-converted corrected decimal visual acuity at each observation time point (Post-transplant Weeks 2, 4, 12, 24, 52, 78, and 104 and discontinuation day) from baseline, summary statistics will be calculated. - Both target and fellow eyes are performed |
| Longitudinal change in the variation of corrected visual acuity for each patient (Landolt ring) (Figure 2.5.4.1) | - The variation of LogMAR-converted corrected decimal visual acuity from the value on the screening day of the COMET01 clinical trial (hereinafter referred to as baseline) will be plotted for each actual observation time point (Post-transplant Weeks 2, 4, 12, 24, 52, 78, and 104; additional treatment conduction day (before conduction); and discontinuation day) (weeks), and a line plot will be graphically shown for each patient. |
| Variation of corrected visual acuity (ETDRS) by time point  (Table 2.5.4.2) | - Regarding the variation of corrected visual acuity at each observation time point (Post-transplant Weeks 2, 4, 12, 24, 52, 78, and 104; and discontinuation day) from baseline, summary statistics will be calculated. - Both target and fellow eyes are performed |
| Longitudinal change in the variation of corrected visual acuity for each patient (ETDRS)  (Figure 2.5.4.2) | - The variation of corrected visual acuity from baseline will be plotted for each actual observation time point (Post-transplant Weeks 2, 4, 12, 24, 52, 78, and 104; and discontinuation day) (weeks), and a line plot separately from the transplanted eye and the fellow eye will be graphically shown for each patient. - Both target and fellow eyes are performed |
| Direction of change in corrected visual acuity (Landolt ring)  (Table 2.5.4.3) | - Regarding the direction of change in corrected visual acuity at each observation time point (Post-transplant Weeks 2, 4, 12, 24, 52, 78, and 104; additional treatment conduction day; and discontinuation day) from baseline, patients will be tabulated for each category. - Both target and fellow eyes are performed |
| Direction of change in corrected visual acuity (Landolt ring)  (Table 2.5.4.4) | - Regarding the direction of change in corrected visual acuity at each observation time point (Post-transplant Weeks 2, 4, 12, 24, 52, 78, and 104; additional treatment conduction day; and discontinuation day) from baseline, patients will be tabulated for each category. - Both target and fellow eyes are performed |
| Improvement rate of corrected visual acuity (Landolt ring) (Table 2.5.4.5) | - Regarding the variation of LogMAR-converted corrected decimal visual acuity at each observation time point (Post-transplant Weeks 2, 4, 12, 24, 52, 78, and 104 and discontinuation day) from baseline, patients will be tabulated for each categories. - Both target and fellow eyes are performed |
| Improvement rate of corrected visual acuity (ETDRS) (Table 2.5.4.6) | - Regarding the variation of corrected visual acuity at each observation time point (Post-transplant Weeks 2, 4, 12, 24, 52, 78, and 104; and discontinuation day) from baseline, patients will be tabulated for each categories. |
| List of corrected visual acuity (Listing 2.5.4) | The following items will be shown in order of the enrollment code.   - Enrollment code - Inclusion in/exclusion from populations: efficacy, effect judgment, and safety - Evaluation time point (the screening day of the COMET01 clinical trial; Post-transplant Weeks 2, 4, 12, 24, 52, 78, and 104; additional treatment conduction day (before conduction); and discontinuation day) - Evaluation day and time from the transplantation day (days) - Landolt ring of transplanted eye: corrected decimal visual acuity, LogMAR-converted corrected decimal visual acuity (the screening day; Post-transplant Weeks 2, 4, 12, 24, 52, 78, and 104; additional treatment conduction day (before conduction); and discontinuation day) - ETDRS of transplanted eye: corrected visual acuity (the screening day; Post-transplant Weeks 2, 4, 12, 24, 52, 78, and 104; additional treatment conduction day (before conduction); and discontinuation day) - Landolt ring of fellow eye: corrected decimal visual acuity, LogMAR-converted corrected decimal visual acuity (the screening day; Post-transplant Weeks 2, 4, 12, 24, 52, 78, and 104; additional treatment conduction day (before conduction); and discontinuation day) - ETDRS of opposite eye: corrected visual acuity (the screening day; Post-transplant Weeks 2, 4, 12, 24, 52, 78, and 104; additional treatment conduction day (before conduction); and discontinuation day)   * For LogMAR-converted visual acuity in and after Post-transplant Week 2, its variation from baseline will also be displayed. |

#### QOL evaluation

| Analysis set | Efficacy analysis set and consent-acquired patients |
| --- | --- |

| Item | Description |
| --- | --- |
| QOL evaluation (Table 2.5.5.1)  QOL evaluation (Patients with additional treatment) (Table 2.5.5.2) | - For QOL grades on the screening day, in Post-transplant Weeks 52 and 104, and at the final evaluation time, summary statistics will be calculated. - For QOL grades of patients with additional treatment on the the screening day in Post-transplant Weeks 52 and 104; additional treatment conduction day (before conduction); and discontinuation day, summary statistics will be calculated. |
| List of QOL evaluation (Listing 2.5.5) | The following items will be shown in order of the enrollment code.   - Enrollment code - Inclusion in/exclusion from populations: efficacy, effect judgment, and safety - Evaluation time point (the screening day, Post-transplant Weeks 52 and 104, additional treatment conduction day (before conduction), and discontinuation day) - Evaluation day and time from the transplantation day (days) - Score (for each question; subscale total)   General sense of well-being: Question 1  General vision: Question 2; subscale total  Eye pain: Questions 4 and 19; subscale total  Behavior depending on near vision: Questions 5, 6, and 7; subscale total  Behavior depending on distant vision: Questions 8, 9, and 14; subscale total  Social functioning depending on vision: Questions 11 and 13; subscale total  Mental health depending on vision: Questions 3, 21, 22, and 25; subscale total  Role functioning depending on vision: Questions 17 and 18, subscale total  Self-sustainability depending on vision: Questions 20, 23, and 24; subscale total  Driving: Questions 15b, 15c, and 16  Color vision: Question 12; subscale total  Peripheral vision: Question 10; subscale total   - QOL grade   * “General health” and “driving” will be excluded from calculation of subscale total and QOL grade. |

#### Extent of corneal opacity

| Analysis set | Efficacy analysis set, and consent-acquired patients |
| --- | --- |

| Item | Description |
| --- | --- |
| Direction of change in the extent of corneal opacity by time point  (Table 2.5.6) | - The direction of change in the extent of corneal opacity will be tabulated by evaluation time point (Post-transplant Weeks 2, 4, 12, 24, 52, 78, and 104; and discontinuation day). - Both target and fellow eyes are performed |
| Longitudinal change in the extent of corneal opacity for each patient (Figure 2.5.6) | - The severity of corneal opacity will be plotted separately from the transplanted eye and the fellow eye for each actual observation time point (the screening day; Post-transplant Weeks 2, 4, 12, 24, 52, 78, and 104; additional treatment therapy conduction day (before conduction); and discontinuation day) (weeks), and a line plot will be graphically shown for each patient by connecting the plotted points. |
| List of the extent of corneal opacity, corneal neovascularization, and symblepharon (Listing 2.5.6) | The following items will be shown in order of the enrollment code.   - Enrollment code - Inclusion in/exclusion from populations: efficacy, effect judgment, and safety - Evaluation time point (the screening day; Post-transplant Weeks 2, 4, 12, 24, 52, 78, and 104; additional treatment conduction day (before conduction); and discontinuation day) - Evaluation day (time from the transplantation day (days)) - Extent of corneal opacity in transplanted eye - Extent of corneal opacity in fellow eye - Extent of corneal neovascularization in transplanted eye - Extent of corneal neovascularization in fellow eye - Extent of symblepharon in transplanted eye - Extent of symblepharon in fellow eye |

#### Extent of corneal neovascularization

| Analysis set | Efficacy analysis set |
| --- | --- |

| Item | Description |
| --- | --- |
| Direction of change in the extent of corneal neovascularization by time point (Table 2.5.7) | - The direction of change in the extent of corneal neovascularization will be tabulated by evaluation time point (Post-transplant Weeks 2, 4, 12, 24, 52, 78, and 104; and discontinuation day). - Both target and fellow eyes are performed |
| Longitudinal change in the extent of corneal neovascularization for each patient (Figure 2.5.7) | - The severity of corneal neovascularization will be plotted separately from the transplanted eye and the fellow eye for each actual observation time point (the screening day; Post-transplant Weeks 2, 4, 12, 24, 52, 78, and 104; additional treatment conduction day (before conduction); and discontinuation day) (weeks), and a line plot will be graphically shown for each patient by connecting the plotted points. |

#### Extent of symblepharon

| Analysis set | Efficacy analysis set, evaluation set for the response assessment committee, and consent-acquired patients |
| --- | --- |

| Item | Description |
| --- | --- |
| Direction of change in the extent of symblepharon by time point  (Table 2.5.8) | - The direction of change in the extent of symblepharon will be tabulated by evaluation time point (Post-transplant Weeks 2, 4, 12, 24, 52, 78, and 104; and discontinuation day). - Both target and fellow eyes are performed |
| Longitudinal change in the extent of symblepharon for each patient (Figure 2.5.8) | - The severity of symblepharon will be plotted separately from the transplanted eye and the fellow eye for each actual observation time point (the screening day Post-transplant Weeks 2, 4, 12, 24, 52, 78, and 104; additional treatment conduction day (before conduction); and discontinuation day) (weeks), and a line plot will be graphically shown for each patient by connecting the plotted points. |

#### Additional treatment

| Analysis set | Efficacy analysis set and consent-acquired patients |
| --- | --- |

| Item | Description |
| --- | --- |
| Additional treatment conduction status and contribution to corneal epithelial reconstruction (Table 2.5.9.1) | The following items will be summarized.   - Whether additional treatment is being taken - Whether or not the additional treatment was contributing to the outcome of treatment - Reasons for cases that were not performed |
| List of additional treatment (Listing 2.5.9.1) | - The following items will be shown in order of the enrollment code. - Enrollment code - Name of additional treatment - Transplanted/fellow eye - Number of days since transplant date (week) |
| Contribution list to corneal epithelial reconstruction in the case of additional treatment for transplanted eyes of clinical trial products (Listing 2.5.9.2) | The following items will be shown in order of the enrollment code.   - Enrollment code - Contribution of investigational products to treatment outcomes (reasons for evaluation) - Reasons for cases that were not performed |
| Corrected visual acuity before and after additional treatment (Table 2.5.9.2) | Corrected visual acuity and changes before additional treatment and at 104 weeks of transplantation in patients treated additionally to the implanted eye.   - LogMAR-converted orthodontic fractional vision (Landolt ring) - LogMAR-converted orthodontic fractional vision (Landolt ring) Amount of change before and after - Corrected Vision (ETDRS) - Corrected Vision (ETDRS) Amount of change before and after |

## Safety evaluation

Adverse events will be tabulated by using Primary SOC and PT encoded with MedDRA/J.

### Brief summary of adverse events

| Analysis set | Safety analysis set |
| --- | --- |

| Item | Description |
| --- | --- |
| Brief summary of adverse events (treatment period of J-TEC-COMET01-FU clinical trial) (Table 3.1.1)  Brief summary of adverse events (treatment period)  (Table 3.1.2) | For the following items, the number of patients and cases with onsets will be tabulated by causality, and the confidence intervals of incidence rates will be calculated.   - Adverse events - Ocular topical adverse events - Non-ocular topical adverse events - Serious adverse events - Those occurring after tissue collection will be included. |

### Conversion of adverse events

| Analysis set | Consent-acquired patients |
| --- | --- |

| Conversion list of adverse events (Table 3.2) | - Primary SOCs, PTs, LLTs, and adverse event names will be displayed. |
| --- | --- |

### Important malfunctions

| Analysis set | Safety analysis set and consent-acquired patients |
| --- | --- |

| Item | Description |
| --- | --- |
| Important malfunctions (treatment period of J-TEC-COMET01-FU clinical trial) (Table 3.3.1)  Important malfunctions (treatment period)  (Table 3.3.2) | - The number of patients in whom important malfunctions occurred will be tabulated, and the confidence interval of incidence rate will be calculated. |
| Onset time of important malfunctions (treatment period) (Table 3.3.3) | - The patients for whom important malfunctions are judged as “present” will be tabulated by evaluation time point (Post-transplant Weeks 2, 4, 12, 24, 52, 78, and 104; additional treatment conduction day (before conduction); and discontinuation day). |
| List of important malfunctions (neoplastic lesions at transplanted sites) (treatment period) (Listing 3.3.1)  List of important malfunctions (allergic symptoms) (treatment period) (Listing 3.3.2)  List of important malfunctions (unknown infectious diseases) (treatment period) (Listing 3.3.3) | For the important malfunctions (1)–(3), the following items will be shown in order of the enrollment code.   - Enrollment code - Onset site (transplanted eye, fellow eye, bilateral eyes, and other than the eyes) - Trial Classification (COMET01 clinical trial (S1), J-TEC-COMET01-FU clinical trial (S2)) - Adverse event name (Name written by the doctor) - Adverse event PT - Onset date - Time to onset (days) - Severity - Seriousness - Outcome date (outcome) - Duration (days) - Causality (tissue collection/investigational product) - Reason for causality judgment - Treatments, courses, etc. |

### Tabulation of ocular topical adverse events

#### Causality of ocular topical adverse events

| Analysis set | Safety analysis set |
| --- | --- |

| Item | Description |
| --- | --- |
| Causality of ocular topical adverse events (treatment period) (Table 3.4.1.1)  Causality of ocular topical adverse events at transplanted eye (treatment period) (Table 3.4.1.2) | Patients in whom ocular topical adverse events occurred will be tabulated by Primary SOC and PT for each of the following categories, and the confidence intervals of incidence rates will be calculated.   - Causality: undeniable - Causality: undeniable + deniable   Causality will be classified on the basis of the causal relationship with tissue collection for adverse events in the observation period and with the investigational product for adverse events in the treatment period.  However, for adverse events in the observation period, those occurring after tissue collection will be included. |

#### Severity of ocular topical adverse events

| Analysis set | Safety analysis set |
| --- | --- |

| Item | Description |
| --- | --- |
| Severity of ocular topical adverse events (treatment period) (Table 3.4.2.1)  Severity of ocular topical adverse events at transplanted eye (treatment period) (Table 3.4.2.2) | Patients in whom ocular topical adverse events occurred will be tabulated by Primary SOC and PT for each severity level.  However, for adverse events in the observation period, those occurring after tissue collection will be included. |

#### Seriousness of ocular topical adverse events

| Analysis set | Safety analysis set |
| --- | --- |

| Item | Description |
| --- | --- |
| Seriousness of ocular topical adverse events (treatment period) (Table 3.4.3.1)  Seriousness of ocular topical adverse events at transplanted eye (treatment period) (Table 3.4.3.2) | Patients in whom ocular topical adverse events occurred will be tabulated by Primary SOC and PT for each seriousness level.  However, for adverse events in the observation period, those occurring after tissue collection will be included. |

#### Onset time of ocular topical adverse events

| Analysis set | Safety analysis set |
| --- | --- |

| Item | Description |
| --- | --- |
| Onset time of ocular topical adverse events (treatment period) (Table 3.4.4.1)  Onset time of ocular topical adverse events at transplanted eye (treatment period)  (Table 3.4.4.2) | Patients in whom ocular topical adverse events occurred will be tabulated by Primary SOC and PT for each onset time categories. |
| Onset time of ocular topical malfunctions (treatment period) (Table 3.4.4.3)  Onset time of ocular topical malfunctions at transplanted eye (treatment period)  (Table 3.4.4.4) | Patients in whom ocular topical malfunctions occurred will be tabulated by Primary SOC and PT for each onset time categories. |

### Tabulation of non-ocular topical adverse events

#### Causality of non-ocular topical adverse events

| Analysis set | Safety analysis set |
| --- | --- |

| Item | Description |
| --- | --- |
| Causality of non-ocular topical adverse events (treatment period) (Table 3.5.1) | The number of patients in whom non-ocular topical adverse events occurred will be tabulated by Primary SOC and PT for each of the following categories, and the incidence rates and their confidence intervals will be calculated.   - Causality: undeniable - Causality: undeniable + deniable |

#### Severity of non-ocular topical adverse events

| Analysis set | Safety analysis set |
| --- | --- |

| Item | Description |
| --- | --- |
| Severity of non-ocular topical adverse events (treatment period) (Table 3.5.2) | Patients in whom non-ocular topical adverse events occurred will be tabulated by Primary SOC and PT for each severity level. |

#### Seriousness of non-ocular topical adverse events

| Analysis set | Safety analysis set |
| --- | --- |

| Item | Description |
| --- | --- |
| Seriousness of non-ocular topical adverse events (treatment period)  (Table 3.5.3) | Patients in whom non-ocular topical adverse events occurred will be tabulated by Primary SOC and PT for each seriousness level. |

#### Onset time of non-ocular topical adverse events

| Analysis set | Safety analysis set |
| --- | --- |

| Item | Description |
| --- | --- |
| Onset time of non-ocular topical adverse events (treatment period) (Table 3.5.4.1)  Onset time of non-ocular topical malfunctions  (Table 3.5.4.2) | Patients in whom non-ocular topical adverse events occurred will be tabulated by Primary SOC and PT for each onset time categories.  Patients in whom non-ocular topical malfunctions occurred will be tabulated by Primary SOC and PT for each onset time categories. |

### Ocular topical adverse events by stratified factor

| Analysis set | Safety analysis set |
| --- | --- |

| Item | Description |
| --- | --- |
| Ocular topical adverse events by stratified factor　(treatment period)  (Table 3.6.1)  Ocular topical adverse events in the transplanted eye by stratified factor　(treatment period)  (Table 3.6.2) | The number of patients in whom ocular topical adverse events occurred will be tabulated by stratified factor for each of the following categories, and the incidence rates and their confidence intervals will be calculated.   - Age (years) (Category 3) - Sexuality - Cause of injury (SJS/OCP, other than SJS/OCP)   [In the case of the eye local]   - Presence of ocular complication - Presence of a history of ocular surgery   [In the case of the transplanted eye local]   - Presence of ocular complication in the transplanted eye - Presence of a history of ocular surgery in the transplanted eye |
| Ocular topical malfunctions by stratified factor (treatment period)  (Table 3.6.3)  Ocular topical malfunctions in the transplanted eye by stratified factor　(treatment period)  (Table 3.6.4) | The number of patients in whom ocular topical malfunctions occurred will be tabulated by stratified factor for each of the following categories, and the incidence rates and their confidence intervals will be calculated.   - Age (years) (Category 3) - Sexuality - Cause of injury (SJS/OCP, other than SJS/OCP)   [In the case of the eye local]   - Presence of ocular complication - Presence of a history of ocular surgery   [In the case of the transplanted eye local]   - Presence of ocular complication in the transplanted eye   Presence of a history of ocular surgery in the transplanted eye |

### Non-ocular topical adverse events by stratified factor

| Analysis set | Safety analysis set |
| --- | --- |

| Item | Description |
| --- | --- |
| Non-ocular topical adverse events by stratified factor　(treatment period)  (Table 3.7.1) | The number of patients in whom non-ocular topical adverse events occurred will be tabulated by stratified factor for each of the following categories, and the incidence rates and their confidence intervals will be calculated.   - Age (years) (Category 3) - Sexuality - Cause of injury (SJS/OCP, other than SJS/OCP) - Presence of ocular complication - Presence of a history of ocular surgery |
| Non-ocular topical malfunctions by stratified factor　(treatment period)  (Table 3.7.2) | The number of patients in whom non-ocular topical malfunctions occurred will be tabulated by stratified factor for each of the following categories, and the incidence rates and their confidence intervals will be calculated.   - Age (years) (Category 3) - Sexuality - Cause of injury (SJS/OCP, other than SJS/OCP) - Presence of ocular complication - Presence of a history of ocular surgery |

### Adverse event list

| Analysis set | Consent-acquired patients |
| --- | --- |

| Item | Description |
| --- | --- |
| List of patients with adverse events (treatment period) (Listing 3.8.1) | For the patients in whom adverse events occurred in the treatment period, the following items related to those adverse events will be shown in order of the enrollment code.   - Enrollment code - Onset site (transplanted eye, fellow eye, bilateral eyes, and other than the eyes) - Trial Classification (COMET01 clinical trial (S1), J-TEC-COMET01-FU clinical trial (S2)) - Adverse event name (Name written by the doctor) - Adverse event PT - Onset date - Time to onset (days) - Severity - Seriousness - Outcome date (outcome) - Duration (days) - Causality (tissue collection/investigational product) - Reason for causality judgment - Treatments, courses, etc. |
| List of patients with deaths and other serious adverse events (treatment period) (Listing 3.8.2) | For the patients in whom adverse events occurred in the treatment period, the following items related to those adverse events will be shown in order of the enrollment code.   - Enrollment code - Onset site (transplanted eye, fellow eye, bilateral eyes, and other than the eyes) - Trial Classification (COMET01 Clinical Trial (S1), J-TEC-COMET01-FU clinical trial (S2)) - Adverse event name (Name written by the doctor) - Adverse event PT - Onset date - Time to onset (days) - Severity - Seriousness - Outcome date (outcome) - Duration (days) - Causality (tissue collection/investigational product) - Reason for causality judgment - Treatments, courses, etc. |
| List of patients with adverse events resulting in discontinuation (treatment period) (Listing 3.8.3) | For the patients in whom adverse events occurred in the treatment period, the following items related to those adverse events will be shown in order of the enrollment code.   - Enrollment code - Onset site (transplanted eye, fellow eye, bilateral eyes, and other than the eyes) - Trial Classification (COMET01 clinical trial (S1), J-TEC-COMET01-FU Clinical Trial (S2)) - Adverse event name (Name written by the doctor) - Adverse event PT - Onset date - Time to onset (days) - Severity - Seriousness - Outcome date (outcome) - Duration (days) - Causality (tissue collection/investigational product) - Reason for causality judgment - Treatments, courses, etc. |

### Laboratory test

| Analysis set | Consent-acquired patients and safety analysis set |
| --- | --- |

| Item | Description |
| --- | --- |
| Shift table of laboratory values (Table 3.9) | For every laboratory test item, low/normal/high values will be cross tabulated for the screening day and transplantation day (for tests after transplantation), Post-transplant Week 52 and 104 and discontinuation day. |
| List of laboratory values (Listing 3.9) | The following items will be shown in order of the enrollment code.   - Enrollment code - Test time point (the screening day, transplantation day [after transplantation], Post-transplant Weeks 52 and 104, additional treatment conduction day (before conduction), and discontinuation day) - Laboratory values:   Hematological test: Red blood cell count, white blood cell count, differential leukocyte count (neutrophil, eosinophil, basophil, and lymphocyte), hemoglobin, hematocrit, and platelet count  Blood biochemical test: AST (GOT), ALT (GPT), serum total protein, and serum creatinine  Immunoserological test: CRP |

##

## List of tables, listings, and figures

| Table/listing/ figure number | Title |
| --- | --- |
| Efficacy |  |
| Table 1.1 | Breakdown of patients |
| Table 1.2.1 | Breakdown of discontinuation |
| Table 1.2.2 | Breakdown of discontinuation/dropout by trial site |
| Table 1.3.1 | Deviation from the protocol by trial site |
| Table 1.3.2 | Handling of deviation from the protocol |
| Table 2.1 | Inclusion in/exclusion from the analysis set |
| Table 2.2 | Demographic and other baseline characteristics |
| Table 2.3 | Conduction status (duration) |
| Table 2.4.1.1 | Conversion list of concomitant drugs |
| Table 2.4.1.2 | Concomitant drug (treatment period) |
| Table 2.4.2.1 | Conversion list of concomitant therapies |
| Table 2.4.2.2 | Concomitant therapy (treatment period) |
| Table 2.5.1.1 | Success rate of corneal epithelium reconstruction in Post-transplant Week 104 (%) |
| Table 2.5.1.2 | Success rate of corneal epithelium reconstruction in Post-transplant Week 104 (%) (evaluation by the investigator) |
| Table 2.5.2.1 | Limbal stem cell deficiency severity classification by time point |
| Table 2.5.2.2 | Limbal stem cell deficiency severity classification by time point (evaluation by the investigator) |
| Table 2.5.2.3 | Direction of change in limbal stem cell deficiency severity classification by time point |
| Table 2.5.2.4 | Direction of change in limbal stem cell deficiency severity classification by time point (evaluation by the investigator) |
| Table 2.5.3 | Direction of change in the severity of subjective symptoms by time point |
| Table 2.5.4.1 | Variation of corrected visual acuity (Landolt ring) by time point |
| Table 2.5.4.2 | Variation of corrected visual acuity (ETDRS) by time point |
| Table 2.5.4.3 | Direction of change in corrected visual acuity (Landolt ring) |
| Table 2.5.4.4 | Direction of change in corrected visual acuity (Landolt ring) |
| Table 2.5.4.5 | Improvement rate of corrected visual acuity (Landolt ring) |
| Table 2.5.4.6 | Improvement rate of corrected visual acuity (ETDRS) |
| Table 2.5.5.1 | QOL evaluation |
| Table 2.5.5.2 | QOL evaluation (Patients with additional treatment) |
| Table 2.5.6 | Direction of change in the extent of corneal opacity by time point |
| Table 2.5.7 | Direction of change in the extent of corneal neovascularization by time point |
| Table 2.5.8 | Direction of change in the extent of symblepharon by time point |
| Table 2.5.9.1 | Additional treatment conduction status and contribution to corneal epithelial reconstruction |
| Table 2.5.9.2 | Corrected visual acuity before and after additional treatment |
| Safety |  |
| Table 3.1.1 | Brief summary of adverse events (treatment period of J-TEC-COMET01-FU clinical trial) |
| Table 3.1.2 | Brief summary of adverse events (treatment period) |
| Table 3.2 | Conversion list of adverse events |
| Table 3.3.1 | Important malfunctions (treatment period of J-TEC-COMET01-FU clinical trial) |
| Table 3.3.2 | Important malfunctions (treatment period) |
| Table 3.3.3 | Onset time of important malfunctions (treatment period) |
| Table 3.4.1.1 | Causality of ocular topical adverse events (treatment period) |
| Table 3.4.1.2 | Causality of ocular topical adverse events at transplanted eye (treatment period) |
| Table 3.4.2.1 | Severity of ocular topical adverse events (treatment period) |
| Table 3.4.2.2 | Severity of ocular topical adverse events at transplanted eye (treatment period) |
| Table 3.4.3.1 | Seriousness of ocular topical adverse events (treatment period) |
| Table 3.4.3.2 | Seriousness of ocular topical adverse events at transplanted eye (treatment period) |
| Table 3.4.4.1 | Onset time of ocular topical adverse events (treatment period) |
| Table 3.4.4.2 | Onset time of ocular topical adverse events at transplanted eye (treatment period) |
| Table 3.4.4.3 | Onset time of ocular topical malfunctions (treatment period) |
| Table 3.4.4.4 | Onset time of ocular topical malfunctions at transplanted eye (treatment period) |
| Table 3.5.1 | Causality of non-ocular topical adverse events (treatment period) |
| Table 3.5.2 | Severity of non-ocular topical adverse events (treatment period) |
| Table 3.5.3 | Seriousness of non-ocular topical adverse events (treatment period) |
| Table 3.5.4.1 | Onset time of non-ocular topical adverse events (treatment period) |
| Table 3.5.4.2 | Onset time of non-ocular topical malfunctions |
| Table 3.6.1 | Ocular topical adverse events by stratified factor　(treatment period) |
| Table 3.6.2 | Ocular topical adverse events in the transplanted eye by stratified factor　(treatment period) |
| Table 3.6.3 | Ocular topical malfunctions by stratified factor (treatment period) |
| Table 3.6.4 | Ocular topical malfunctions in the transplanted eye by stratified factor　(treatment period) |
| Table 3.7.1 | Non-ocular topical adverse events by stratified factor　(treatment period) |
| Table 3.7.2 | Non-ocular topical malfunctions by stratified factor　(treatment period) |
| Table 3.9 | Shift table of laboratory values |
| Listing |  |
| Listing 1.1.1 | Patient list |
| Listing 1.1.2 | List of ineligible patients |
| Listing 1.2 | List of patients who discontinued |
| Listing 1.3 | List of patients with deviation from the protocol |
| Listing 2.1.1 | List of patients excluded from the efficacy analysis set |
| Listing 2.1.2 | List of patients excluded from the safety analysis set |
| Listing 2.2.1 | List of patient backgrounds |
| Listing 2.2.2 | List of complications |
| Listing 2.2.3 | List of past diseases |
| Listing 2.2.4 | List of ocular surgery histories |
| Listing 2.3 | List of conduction status |
| Listing 2.4.1 | List of concomitant drugs (treatment period) |
| Listing 2.4.2 | List of concomitant therapies (treatment period) |
| Listing 2.5.2 | List of limbal stem cell deficiency severity classification |
| Listing 2.5.3 | List of subjective symptoms |
| Listing 2.5.4 | List of corrected visual acuity |
| Listing 2.5.5 | List of QOL evaluation |
| Listing 2.5.6 | List of the extent of corneal opacity, corneal neovascularization, and symblepharon |
| Listing 2.5.9.1 | List of additional treatment |
| Listing 2.5.9.2 | Contribution list to corneal epithelial reconstruction in the case of additional treatment for transplanted eyes of clinical trial products |
| Listing 3.3.1 | List of important malfunctions (neoplastic lesions at transplanted sites) (treatment period) |
| Listing 3.3.2 | List of important malfunctions (allergic symptoms) (treatment period) |
| Listing 3.3.3 | List of important malfunctions (unknown infectious diseases) (treatment period) |
| Listing 3.8.1 | List of patients with adverse events (treatment period) |
| Listing 3.8.2 | List of patients with deaths and other serious adverse events (treatment period) |
| Listing 3.8.3 | List of patients with adverse events resulting in discontinuation (treatment period) |
| Listing 3.9 | List of laboratory values |
| Figure |  |
| Figure 2.5.2.1 | Longitudinal change in limbal stem cell deficiency severity classification for each patient |
| Figure 2.5.2.2 | Longitudinal change in limbal stem cell deficiency severity classification for each patient (evaluation by the investigator) |
| Figure 2.5.3.1 | Longitudinal change in subjective symptoms (eye pain) |
| Figure 2.5.3.2 | Longitudinal change in subjective symptoms (foreign body sensation) |
| Figure 2.5.3.3 | Longitudinal change in subjective symptoms (lacrimation) |
| Figure 2.5.3.4 | Longitudinal change in subjective symptoms (photophobia) |
| Figure 2.5.3.5 | Longitudinal change in subjective symptoms (dry sensation) |
| Figure 2.5.3.6 | Longitudinal change in subjective symptoms (discomfort) |
| Figure 2.5.4.1 | Longitudinal change in the variation of corrected visual acuity for each patient (Landolt ring) |
| Figure 2.5.4.2 | Longitudinal change in the variation of corrected visual acuity for each patient (ETDRS) |
| Figure 2.5.6 | Longitudinal change in the extent of corneal opacity for each patient |
| Figure 2.5.7 | Longitudinal change in the extent of corneal neovascularization for each patient |
| Figure 2.5.8 | Longitudinal change in the extent of symblepharon for each patient |

End of Document
