# Supplementary material
Source: Research Square preprint supplement (doi:10.21203/rs.3.rs-7181420/v1)
Supplement: Supplementary file 4 [file 39640aa5e3a5caab31ab11d8.docx]

Multicenter Investigator-initiated clinical trial using cultivated autologous oral mucosal epithelial cell sheet (COMET01) transplantation for patients with limbal stem-cell deficiency

Protocol

Coordinating investigator:

Prof. Kohji Nishida, M.D., Ph.D.

Ophthalmology, Department of Ophthalmology, Graduate School of Medicine, Osaka University

2-2, Yamadaoka, Suita, Osaka, 565-0871, Japan

Protocol no.: OUH-COMET01
Prepared: July 1, 2015, ver. 1.2

| Confidentiality statement  This protocol contains confidential information of Japan Tissue Engineering. Disclosure of the information is limited to persons involved in this trial for conduct of the trial only.  Disclosure of the protocol to a third party without obtaining written approval from Ophthalmology, Department of Ophthalmology, Graduate School of Medicine, Osaka University in advance is strictly prohibited, except for use to obtain informed consent from the subjects.  Patent application, manufacturing process, unpublished scientific data, and other information relating to COMET01 are proprietary confidential information of Osaka University. |
| --- |

| Ver: 1.2 | Prepared: July 1, 2015 |
| --- | --- |

Definition of abbreviations and terms

List of abbreviations

| Abbreviation | Description |
| --- | --- |
| GCP | Good clinical practice |
| IRB | Institutional Review Board |
| MedDRA/J | Medical Dictionary for Regulatory Activities Terminology/J |
| SOP | Standard operating procedure |
| ETDRS | Early Treatment Diabetic Retinopathy Study |

List of terms

| Term | Description |
| --- | --- |
| COMET01 | Development code of the investigational product |

Synopsis

| Objectives of the trial  To evaluate the efficacy and safety of cultivated autologous oral mucosal epithelial cell sheet COMET01 (hereinafter referred to as the investigational product) transplantation in patients diagnosed with limbal stem cell deficiency (LSCD) |
| --- |
| Disease studied  Limbal stem cell deficiency |
| Inclusion criteria/exclusion criteria  Patients who satisfy all of the inclusion criteria and none of exclusion criteria listed as follows are eligible for the trial. In addition, the investigational product is transplanted only in one eye. When bilateral eyes meet the transplantation criteria, the following items are referred to as the following items, and it is judged comprehensively after consulting with the patient   - Visual acuity - Corneal stromal opacity - Cataract - Tear fluid volume, etc.   Inclusion criteria  Patients diagnosed with LSCD classification Stage III.  Figure 1   | 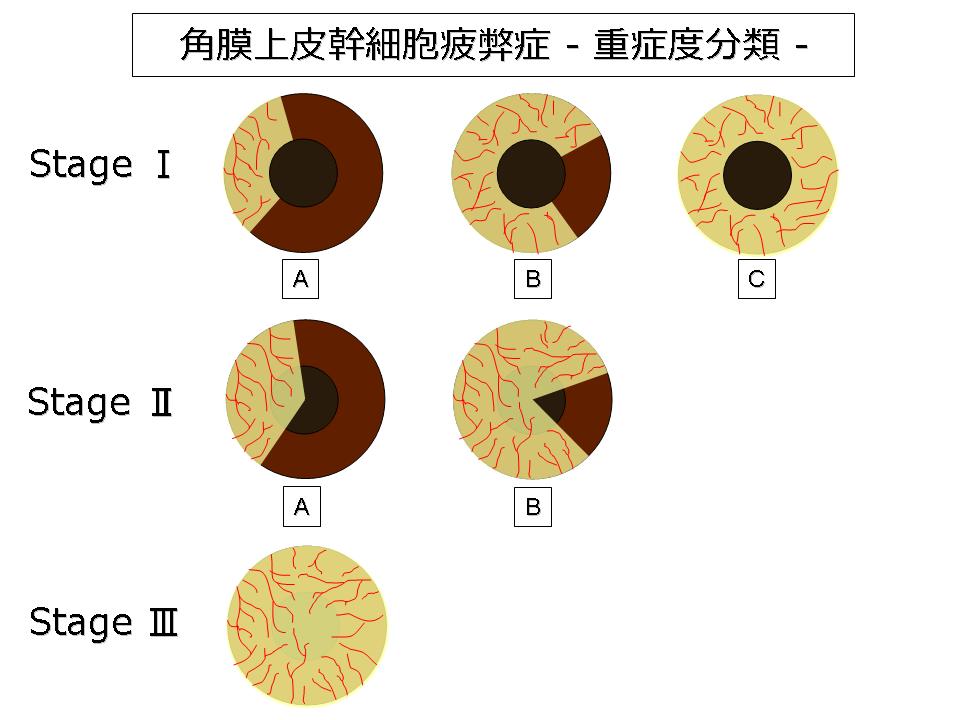 Stages of LSCD | Stage I: No conjunctivalization is present in the center of the cornea (diameter 5 mm), and the percentage of conjunctivalization in the corneal limbus is as follows: A: <50% B: ≥50% and <100% C: 100%  Stage II: Conjunctivalization is present in the center of the cornea (diameter 5 mm), and the percentage of conjunctivalization in the corneal limbus is as follows: A: <50% B: ≥50% and <100%  Stage III: The whole corneal surface is covered by conjunctival tissue. | | --- | --- |   Patients who don't have extensive oral mucosal scarring and have healthy oral mucosal tissue for harvest.  Patients ≥20 years old at the time of informed consent  Exclusion criteria  Antibacterial drugs, corticosteroids, or anesthetic drugs used in the trial are contraindicated.  Hypersensitivity to antibiotics of penicillin, kanamycin, streptomycin, and amphotericin B, or history of hypersensitivity to penicillin antibiotics or aminoglycoside antibiotics  History of hypersensitivity to animals (cows, mice, or pigs)  History of malignant tumor within 5 years prior to screening, or currently suspected with malignant tumor  Glaucoma with poorly controlled intraocular pressure  Diabetes mellitus with poor glycemic control  Defect in central vision of the eye to which the investigational product is to be implanted (target eye).  Treatment-resistant, severe decrease in tear  Intraocular surgery is scheduled in the trial period.  Severe abnormality in eyelid of the target eye  Any concurrent medical condition in the target eye or the whole body which may interfere with proper evaluation of the trial treatment, in the opinion of the investigator or subinvestigator  Pregnant women, lactating women, women who are possibly pregnant, or women who want to be pregnant during the trial period  Patients who have participated in another clinical trial within 16 weeks prior to transplantation of the investigational product, who are participating in another clinical trial at transplantation of the investigational product, or who have a schedule to participate in another clinical trial during participation in the present trial  Other patients who are not eligible for the trial, in the opinion of the investigator or subinvestigator |
| Trial design  Multicenter, open-label, non-controlled trial |
| Procedure and time of informed consent  Procedure  Written informed consent is obtained from patients themselves.  Time of informed consent  Before start of screening test/observation |
| Concomitant drugs/therapies  For the drugs concomitantly used during the trial period, the name, administration route, and period and purpose of use are documented in the Case Report Form (CRF). For the therapies concomitantly used during the trial period, the name and period and purpose of use are documented in the CRF.  Prohibited concomitant drugs  Use of the following drugs in bilateral eyes are prohibited during the trial period, because they may interfere with evaluation of the trial treatment:  Non-steroidal anti-inflammatory eye drops  Drugs for glaucoma with potent effect to injure the epithelium: timolol maleate, betaxolol hydrochloride, and isopropyl unoprostone  Artificial tear-containing preservative  Prohibited concomitant therapies  Use of the following therapies in bilateral eyes is prohibited during the trial period, because they may interfere with evaluation of the trial treatment:  Corneal transplantation  Curettage of the conjunctival epithelium from the cornea  Amniotic membrane transplantation to the cornea  Instillation of autologous serum |
| Non-proprietary name of the investigational product  Human autograft (cultivated autologous oral mucosal epithelial cell sheet) |
| Items and time of test/observation  Tests/observation are performed according to the test/observation schedule, respectively. |
| Endpoints  Efficacy  Primary endpoint:  Success rate of corneal epithelium reconstruction (%) at Week 52 after transplantation of the investigational product  Secondary endpoints:  Number of subjects by severity of LSCD at Week 52 after transplantation of the investigational product  Subjective symptoms  Corrected visual acuity  Evaluation of QOL  Severity of corneal opacity  Severity of corneal neovascularization  Severity of symblepharon  Whether additional treatment to improve visual acuity is indicated or not at Week 52 after transplantation of the investigational product or at trial discontinuation  Severity of LSCD, subjective symptoms, corrected vision, degree of corneal opacity, degree of corneal neovascularization and degree of symblepharon in the fellow eye  Safety  Significant safety endpoints  Superficial punctate keratopathy: the number of subjects and incidence (%)  Corneal epithelial defect: the number of subjects and incidence (%)  Corneal keratinization: the number of subjects and incidence (%)  Conjunctival injection: the number of subjects and incidence (%)  Infectious keratitis: the number of subjects and incidence (%)  Endophthalmitis: the number of subjects and incidence (%)  Adverse events and malfunctions: the number of subjects and incidence (%)  Important malfunctions: the number of subjects and incidence (%) |
| Planned sample size: 6 patients  Sample size for efficacy analysis: 5 subjects |
| Trial period  From July 15, 2015, to March 31, 2017 |
| Good clinical practice (GCP) inspection  GCP inspection is applicable to this trial. |

Table 1 Trial Schedule from the Enrollment of the Subjects and Transplantation of the Investigational product

治験担当部門

治験機器製造部門

移

植

前

移

植

後

適格性

判定委員会

症

例

登

録

組

織

採

取

治

験

機

器

移

植

治験

スケジュール

治験実施医療機関

治験依頼者

登録時

データセンター

同意取得

適格性の調査

適格性調査票

＜登録センター＞

症例登録

＜モニタリング担当者＞

適格性確認

治験機器製造協議書

＜登録センター＞

受領

角膜輪部の採取

組織採取記録

治験機器製造開始

製造可否

スケジュールの

変更の検討

出荷可否

治験機器出荷

＜モニタリング担当者＞

運搬

治験機器搬入

治験機器移植

不可

可

可

不可

適格性判定

適格性判定

結果通知書

前眼部

写真データ

| Trial schedule | | Trial site | J-TEC | | Registration data center | Eligibility evaluation committee |
| --- | --- | --- | --- | --- | --- | --- |
| Department in charge of the trial | Department in charge of manufacturing the investigational product |
| Enrollment of the subjects | | Informed consent  Evaluation of eligibility  Eligibility evaluation form for enrollment of subjects  Conference document for manufacturing of the investigational product  <Registration center> Registration of the subjects  <Monitors> Confirmation of eligibility  <Registration center> Receipt  Photos of the anterior ocular segment  Notification of eligibility results  Determination of eligibility  Biopsy of the oral mucosal tissue  Record of biopsy  Review necessity of change in schedule  Start of manufacturing of the investigational product  Can manufacturing be started?  No  Yes  Can the investigational produc be shipped?  Delivery of the investigational product  Transplantation of the investigational product  <Monitors> Delivery  Shipment of the investigational product  Yes  No |  |  |  |  |
| Collection of the biopsy sample | |  |  |  |  |  |
| Transplantation of the investigational product | Before transplantation |  |  |  |  |  |
| After transplantation |  |  |  |  |  |

Table 2 Test/Observation Schedule

| Time  Observation | Observation period | | | | | Follow-up period | | | | | | Dis-continua-tion |
| --- | --- | --- | --- | --- | --- | --- | --- | --- | --- | --- | --- | --- |
| Visit 1 | Visit 2 | | Visit 3 | | | Visit 4 | Visit 5 | Visit 6 | Visit 7 | Visit 8 |
| Informed consent, screening | Biopsy | | Transplantation of the investigational product | | | Week 2 | Week 4 | Week 12 | Week 24 | Week 52 |
| Before biopsy | After biopsy | Before trans-plantation | During trans-plantation | After trans-plantation | (Days 14±3) | (Days 28±3) | (Days 84±14) | (Days 168±14) | (Days 364±28) | (within +7 days) |
|  | (Day 0) |  |
| Subject's background | ⚫ |  |  |  |  | ⚫ |  |  |  |  |  |  |
| Evaluation of eligibility | ⚫ |  |  |  |  |  |  |  |  |  |  |  |
| Laboratory tests | ⚫*1 | ▲ |  | ⚫*1, 3 |  | ⚫ |  |  |  |  | ⚫ | ⚫ |
| Intraoral observation | ⚫ |  | ⚫*2 |  |  |  | ⚫ |  |  |  |  |  |
| Corrected visual acuity | 🞋 |  |  |  |  |  | 🞋 | 🞋 | 🞋 | 🞋 | 🞋 | 🞋 |
| Photography of the anterior ocular segment | 🞋 |  |  | 🞋*3 | ◼ | ◼ | 🞋 | 🞋 | 🞋 | 🞋 | 🞋 | 🞋 |
| Evaluation of severity of LSCD according to LSCD classification | 🞋 |  |  |  |  |  | 🞋 | 🞋 | 🞋 | 🞋 | 🞋 | 🞋 |
| Subjective symptoms | 🞋 |  |  |  |  |  | 🞋 | 🞋 | 🞋 | 🞋 | 🞋 | 🞋 |
| Evaluation of QOL | ⚫ |  |  |  |  |  |  |  |  |  | ⚫ | ⚫ |
| Severity of corneal opacity | 🞋 |  |  |  |  |  | 🞋 | 🞋 | 🞋 | 🞋 | 🞋 | 🞋 |
| Severity of corneal neovascularization | 🞋 |  |  |  |  |  | 🞋 | 🞋 | 🞋 | 🞋 | 🞋 | 🞋 |
| Severity of symblepharon | 🞋 |  |  |  |  |  | 🞋 | 🞋 | 🞋 | 🞋 | 🞋 | 🞋 |
| Whether additional treatment to improve visual acuity is indicated or not |  |  |  |  |  |  |  |  |  |  | ◼ | ◼ |
| Safety endpoints | 🞋 |  |  |  |  |  | 🞋 | 🞋 | 🞋 | 🞋 | 🞋 | 🞋 |
| Important malfunctions |  |  |  |  |  | ⚫ | ⚫ | ⚫ | ⚫ | ⚫ | ⚫ | ⚫ |
| Adverse events |  |  | ⚫ |  |  |  |  |  | ⚫ |  |  |  |

⚫: Implementation, ◼: For the target eye, 🞋: For bilateral eyes, ▲: Blood sampling only

*1 : Urine pregnancy test is necessary for women subjects with childbearing potential.

*2 : Performed the day after collection of oral mucosal tissue

*3 : Within −4 days prior to transplantation of the investigational product

Table of contents

[1. Background of Development and Rationale of the Protocol 4](#_Toc137135010)

[1.1 Description of Limbal Stem Cell Deficiency (LSCD) 4](#_Toc137135011)

[1.2 Existing Therapies and Their Problems 4](#_Toc137135012)

[1.3 Rationale of the Clinical Trial 5](#_Toc137135013)

[1.4 Profile of the Investigational product 5](#_Toc137135014)

[1.5 Trial Design 6](#_Toc137135015)

[1.6 Clinical Studies 6](#_Toc137135016)

[1.7 Benefits and Risks 7](#_Toc137135017)

[2. Compliance with Good Clinical Practice (GCP) for cellular and Tissue-based Products 8](#_Toc137135018)

[3. Objective of the Trial 8](#_Toc137135019)

[4. Inclusion and Exclusion Criteria 8](#_Toc137135020)

[4.1 Inclusion Criteria 8](#_Toc137135021)

[4.2 Exclusion Criteria 9](#_Toc137135022)

[5. Notification to Other Physicians 11](#_Toc137135023)

[6. Trial Procedure 11](#_Toc137135024)

[6.1 Enrollment of the Subjects and Discussion of the Transplantation Plan 11](#_Toc137135025)

[6.2 Eligibility Evaluation Committee 12](#_Toc137135026)

[6.3 Collection of the Biopsy Sample 12](#_Toc137135027)

[6.4 Transplantation of the Investigational product 12](#_Toc137135028)

[6.5 Evaluation/Observation Period 13](#_Toc137135029)

[6.6 Investigational product 13](#_Toc137135030)

[6.6.1 Investigational product 13](#_Toc137135031)

[6.6.2 Other Components for the Investigational product 14](#_Toc137135032)

[6.7 Criteria and Procedure for Trial Discontinuation of Individual Subject 15](#_Toc137135033)

[6.7.1 Discontinuation Criteria 15](#_Toc137135034)

[6.7.2 Procedure and Follow-up of the Subject who Discontinues the Trial Prematurely 15](#_Toc137135035)

[6.8 Clinical Trial Discontinuation and Suspension Standards and Procedures at the Trial Site 16](#_Toc137135036)

[6.8.1 Discontinuation Criteria 16](#_Toc137135037)

[6.8.2 Registration suspension criteria 16](#_Toc137135038)

[6.8.3 Discontinuation or Suspension Procedures 16](#_Toc137135039)

[6.9 Concomitant Drugs/Therapies 16](#_Toc137135040)

[6.9.1 Acceptable Concomitant Drugs/Therapies 16](#_Toc137135041)

[6.9.2 Prohibited Concomitant Drugs 16](#_Toc137135042)

[6.9.3 Prohibited Concomitant Therapies 17](#_Toc137135043)

[6.10 Pregnancy during clinical trials 17](#_Toc137135044)

[7. Schedule and Items of Test/Observation 17](#_Toc137135045)

[7.1 Survey Items Regarding Demographics and Other Baseline Characteristics (Subject's Background) 17](#_Toc137135046)

[7.2 Photography of the Anterior Ocular Segment 18](#_Toc137135047)

[7.3 Survey Items Regarding Efficacy 18](#_Toc137135048)

[7.4 Survey Items Regarding Safety 20](#_Toc137135049)

[7.5 Test/Observation Schedule 24](#_Toc137135050)

[8. Evaluation of Efficacy and Safety 25](#_Toc137135051)

[8.1 Evaluation of Efficacy 25](#_Toc137135052)

[8.1.1 Primary Endpoint 25](#_Toc137135053)

[8.1.2 Secondary Endpoints 25](#_Toc137135054)

[8.2 Evaluation of Safety 26](#_Toc137135055)

[8.3 Response Assessment Committee 27](#_Toc137135056)

[9. Measures for Adverse Events and Malfunctions 27](#_Toc137135057)

[9.1 Definition of Adverse Event and Malfunction 27](#_Toc137135058)

[9.1.1 Adverse Event 27](#_Toc137135059)

[9.1.2 Malfunction 28](#_Toc137135060)

[9.1.3 Serious Adverse Events 28](#_Toc137135061)

[9.2 Criteria for Severity Assessment of Adverse Events 28](#_Toc137135062)

[9.3 Criteria for Causality Assessment 29](#_Toc137135063)

[9.4 Response and follow-up investigation when adverse events appear 29](#_Toc137135064)

[9.5 Measures for Serious Adverse Events or Important Malfunctions 29](#_Toc137135065)

[9.6 Adverse Events Expressed in Previous Clinical Studies 30](#_Toc137135066)

[10. Compliance with, Deviations from, and Changes and Amendments of the Protocol 34](#_Toc137135067)

[10.1 Compliance with the Protocol 34](#_Toc137135068)

[10.2 Deviations or Change from the Protocol 34](#_Toc137135069)

[10.3 Protocol Amendment 34](#_Toc137135070)

[11. Discontinuation or Suspension of the Entire Trial 34](#_Toc137135071)

[11.1 Discontinuation or Suspension Criteria 34](#_Toc137135072)

[11.2 Discontinuation or Suspension Procedures 35](#_Toc137135073)

[12. Completion of the Trial 35](#_Toc137135074)

[13. Trial Period 35](#_Toc137135075)

[14. Data Handling and Record Keeping 35](#_Toc137135076)

[14.1 Case Report Form 35](#_Toc137135077)

[14.1.1 Preparation of Case Report Forms 35](#_Toc137135078)

[14.1.2 Correction of Case Report Forms 35](#_Toc137135079)

[14.1.3 Specification of Entries in the Case Report Forms to Be Regarded as Source Document 36](#_Toc137135080)

[14.2 Record Keeping 36](#_Toc137135081)

[14.3 Acceptable Range of Test/Observation Schedule 36](#_Toc137135082)

[15. Statistical Analysis 37](#_Toc137135083)

[15.1 Determination of Sample Size 37](#_Toc137135084)

[15.2 Definition of Analysis Sets 40](#_Toc137135085)

[15.2.1 Full Analysis Set (FAS) 40](#_Toc137135086)

[15.2.2 Per Protocol Set (PPS) 40](#_Toc137135087)

[15.2.3 Efficacy Analysis Set 40](#_Toc137135088)

[15.2.4 Safety Analysis Set (Safety) 40](#_Toc137135089)

[15.3 Statistical Analysis Methods 41](#_Toc137135090)

[15.3.1 Efficacy 41](#_Toc137135091)

[15.3.2 Safety 42](#_Toc137135092)

[15.4 Other 43](#_Toc137135093)

[16. Ethical Considerations 43](#_Toc137135094)

[16.1 Protection of Subjects 43](#_Toc137135095)

[16.1.1 Confidentiality 43](#_Toc137135096)

[16.2 Informed Consent 43](#_Toc137135097)

[16.2.1 Preparation of the Written Information and Informed Consent Form 43](#_Toc137135098)

[16.2.2 Acquisition of Consent 44](#_Toc137135099)

[16.2.3 Written Information 44](#_Toc137135100)

[16.2.4 Provision of New Safety Information and Revision of the Written Information and Informed Consent Form 46](#_Toc137135101)

[16.3 Compensation to the Subject in the Event of Trial-related Injury 46](#_Toc137135102)

[17. Direct Access to Source Documents 47](#_Toc137135103)

[18. Quality Control and Quality Assurance 47](#_Toc137135104)

[18.1 Quality Control 47](#_Toc137135105)

[18.2 Quality Assurance 47](#_Toc137135106)

[19. Burden of Trial-related Expenses 48](#_Toc137135107)

[20. Registration of clinical trials, attribution and publication of results 48](#_Toc137135108)

[20.1 Clinical trial registration 48](#_Toc137135109)

[20.2 Attribution and publication of results 48](#_Toc137135110)

[21. References 49](#_Toc137135112)

[22. Attachments 51](#_Toc137135113)

# Background of Development and Rationale of the Protocol

## Description of Limbal Stem Cell Deficiency (LSCD)

The cornea consists of three main layers, epithelium, stroma, and endothelium, from the surface of the eyeball. It is understood that the integrity of the cornea is maintained by continuous and balanced turnover of the epithelium, the uppermost layer, with a cycle of proliferation (X), migration (Y), and sloughing (Z) expressed as X + Y = Z1). The corneal epithelial stem cell is thought to be located in the limbus, which is the narrow transitional zone of the ocular surface located between the cornea and bulbar conjunctiva2), as a source of corneal epithelial cells. LSCD is a condition in which corneal epithelial stem cells disappear and is characterized by invasion of vascularized conjunctival epithelium to the corneal surface, inducing opacity and reduction in visual acuity. Causes of LSCD include aniridia and sclerocornea as congenital anomalies, alkali corrosion or thermal burn as exogenous causes, and Stevens–Johnson syndrome or ocular pemphigoid as endogenous causes, but in some cases, the cause is unknown3).

## Existing Therapies and Their Problems

Existing treatments for LSCD that aim at reconstructing the corneal epithelium include allogeneic limbal transplantation and autologous limbal transplantation4-11). Another option is medication including antibiotics that alleviate subjective symptoms and prevent LSCD from worsening. Existing treatments are described as follows.

<Allogeneic limbal transplantation>

In this therapy, the conjunctival pannus is completely removed from the injured eye, and a corneal limbus graft collected from a cornea donor is transplanted. The corneal limbus covers the cornea of the injured eye and protects the cornea from invasion of conjunctival tissue or invasive cells. However, this therapy has two major problems. The first problem is rejection. It is known that limbal transplantation shows high rejection rate when used in patients with LSCD, a disease of the corneal epithelium. Prognosis is poor even if an immunosuppressant is administered. Another problem is shortage in donors. The Japan Eye Bank Association said that 2,207 patients are waiting for transplantation as of 2013, but only 927 persons donate their eyes a year, indicating serious shortage in donors.

<Autologous limbal transplantation>

In this therapy, two biopsy samples of the corneal limbus are collected from the uninjured eye of the patient himself/herself and transplanted to the injured eye. This treatment can circumvent a problem of rejection, but a graft in a size of approximately 1/6 to 2/3 of the corneal limbus is necessary to be taken from the healthy eye, which brings about serious damage to the uninjured eye. Adverse events including local corneal opacity, pseudopterygium, filamentary keratitis, and epithelium hypoplasia have been reported. Besides, the possibility of occurrence of LSCD in the uninjured eye cannot be ruled out. As a result, autologous limbal transplantation is rarely used these days. In addition, autologous limbal transplantation is not possible for bilateral LSCD.

## Rationale of the Clinical Trial

In LSCD, the loss of corneal epithelial stem cells leads to re-epithelialization by the vascularized conjunctival epithelium (conjunctivalization), which causes subjective symptoms such as eye pain, foreign body sensation, teary eyes, photophobia, dry eye sensation or discomfort, and visual impairment caused by corneal opacity12, 13).

Treatment of LSCD requires removal of the conjunctival tissue present on the cornea and corneal epithelium reconstruction by transplantation of corneal epithelial stem cells. Currently available treatments include allogeneic limbal transplantation and autologous limbal transplantation. However, long-term therapeutic effect cannot be expected for allogeneic limbal transplantation because of rejection, and invasiveness and damage to uninjured eyes from which a graft is collected, are inherent problems of autologous limbal transplantation. Also, it cannot be applied with bilateral disorders. In summary, no safe and effective treatment is available for LSCD.

In treatment using COMET01, since its own cells are used, immunosuppression necessary for allogeneic limbal transplantation is unnecessary. Furthermore, using sheet engineering technology 14, 15) using a temperature-responsive culture dish, development of cultured oral mucosal epithelial cell sheet transplantation that maintains intercellular adhesion has been carried out so far 16-19). In allogeneic and autologous limbal transplantation, the part of the cornea immediately after surgery in which the scar was removed is a full-thickness epithelial defect. On the other hand, in treatment using COMET01, the oral mucosal epithelial cell sheet covers the full-thickness epithelial defect as epithelium immediately after surgery, so a better therapeutic effect can be expected.

Effects expected from transplantation of the investigational product to treat LSCD include corneal epithelium reconstruction and alleviation of clinical symptoms (subjective symptoms and visual impairment). These effects are beneficial for QOL of the patients.

Because materials of animal origin are used for manufacturing the investigational product, material-related infection cannot be completely ruled out. Every effort is made to minimize risk of infection associated with materials of animal origin, such as adding chemicals in medium and setting the cleaning process for bovine serum after cultivation.

We consider that the benefits expected from the investigational product outweigh its risks because the expected risks are fully controlled. Non-clinical studies have demonstrated excellent quality, efficacy, and safety of the investigational product.

In conclusion, a clinical trial to evaluate efficacy and safety of the investigational product can be justified.

## Profile of the Investigational product

The investigational product has the following characteristics. It is aseptically stored and sealed in a special container and delivered to the trial site.

The investigational product is a “cultivated autologous oral mucosal epithelial cell sheet” prepared from the tissue of the oral mucosa of the patient himself/herself.

Mouse embryo-derived 3T3-J2 cells are used as feeder cells.

A temperature-responsive culture dish is used as a container for cultivation.

The investigational product is a sheet with virtual diameter of 22 mm.

## Trial Design

The trial is designed as a multicenter, open-label, non-controlled trial for the following reasons:

Efficacy can be efficiently evaluated, and the results can be generalized.

Because of the nature of the disease studied, blinding is not possible after transplantation of the investigational product.

Currently, no radical treatment is available for LSCD.

## Clinical Studies

The following is an outline of the two clinical studies we have conducted so far in our group.

Corneal regeneration by autologous cultivated oral mucosal epithelial cell sheet transplantation (January, 2003- 2004) 20)

With the approval of the Medical Ethics Committee of the Osaka University School of Medicine, self-epithelial cells isolated and prepared from the oral mucosa were produced in four patients with completely deficient corneal epithelial stem cells due to intractable corneal epithelial disease in bilateral eyes, and cultured epithelial cell sheets were prepared in a tissue engineering manner on a temperature-responsive culture dish with NIH/ 3T3 feeder cells. After surgically removing conjunctival scar tissue from the patient's corneal surface, cell sheets were recovered from the culture dish only with low temperature treatment and transplanted without suture to the exposed corneal stroma.

Before transplantation, iris and pupil details were completely invisible in all four eyes, but within a week after transplantation, the corneal surface was completely reconstructed by epithelial tissue. Corneal transparency was improved in all four eyes, and postoperative visual acuity was significantly improved. During the average 14-month follow-up period, all corneal surfaces were transparent and showed no complications.

Clinical study of autologous cultivated oral mucosal epithelial sheet transplantation for intractable corneal disease (July, 2005- 2007)21)

With the approval of the Clinical Research Committee for Future Medicine at Osaka University Hospital (P0402), the oral mucosa of patients (6 cases) whose corneal epithelial stem cells were completely deficient due to intractable corneal epithelial disease in bilateral eyes was collected, and self-epithelial cells isolated from the mucous membrane were used as self-serum to produce cultured epithelial cell sheets on temperature-responsive culture dishes using feeder cells as self-adipose tissue-derived cells. After surgically removing conjunctival scar tissue from the patient's corneal surface, cell sheets were recovered from the culture dish only by low temperature treatment and transplanted into exposed corneal stroma.

[Safety Results]

As surgical adverse events such as adipose tissue collection, oral mucosa collection, culture sheet transplantation, etc., the frequency of pain and discomfort at the surgical site was high (13 cases in total), but it was a pain of the degree caused by surgical procedures, and it recovered quickly. In addition, as adverse events related to surgery, increased blood pressure during surgery (3 cases), blood pressure decrease (1 case), decrease in SpO2 (4 cases), etc. were recognized, but all were minor and recovered quickly. After sheet transplantation, "eye pain and foreign body sensation" were high in frequency with 5 cases, but both were about the same as those generated after transplantation of general corneal transplantation and amniotic membrane transplantation. Corneal epithelial defects were observed in 3 cases, all of which were partial and temporary, and epithelial defects were cured in all cases. As described above, any adverse events thought to be caused by transplantation of autologous oral mucosal epithelial sheets were minor, and no serious adverse events were observed.

[Efficacy results]

Epithelialization of the transplanted cultured epithelial sheet was improved in all cases after 6 months, although the temporary condition was deteriorated in two cases. The condition of epithelialization at 6 months after transplantation was significantly improved compared with before transplantation (p=0.031). LogMAR visual acuity was significantly improved from 1 month after transplantation in 4 out of 6 cases, and the remaining 2 cases also improved at 6 months after transplantation compared with preoperative. LogMAR visual acuity was evaluated by a mixed effect model, and there was a significant difference between before and after cultured epithelial sheet transplantation (p<0.001). In addition, a multiple comparison of Bonfferoni showed significant improvement in LogMAR vision (0.01 or less) compared to pre-transplantation at all evaluation points (1 month, 3 months, 6 months) after transplantation. As a result of examining the relationship between the degree of improvement of LogMAR and the background factor, the tendency to obtain the visual acuity improvement was recognized as the age was lower (ρ= 0.529). As described above, this treatment method was an effective treatment method that can improve the state of epithelialization and improve vision accordingly for intractable corneal epithelial disease that has not been effective treatment so far.

## Benefits and Risks

The possibility of unexpected adverse events listed in "9.6 Adverse Events Expressed in Previous Clinical Studies" may occur, and in that case, treatment by going to the hospital, hospitalization, etc. may be required. It is also completely ruled out that unforeseen adverse events may leave the disability and the possibility of death. However, since there is no safe, effective and long-lasting treatment for LSCD, if the effect of the investigational product is recognized, corneal epithelial reconstruction can be obtained as well as other treatments, and QOL limited by the disease will be greatly improved.

# Compliance with Good Clinical Practice (GCP) for cellular and Tissue-based Products

The investigators and all trial staff conduct the trial in compliance with ethical principles originating from the Declaration of Helsinki, GCP, and applicable laws and regulations.

This trial is started after obtaining approval from the Institutional Review Board (IRB) of each trial site for the conduct of the trial and after reviewing the protocol, written information, and informed consent form.

During the trial period, the status of the trial is reported to the IRB once a year or as requested by the IRB, which in turn reviews the condition of the trial to evaluate the appropriateness of continued conduct of the trial.

# Objective of the Trial

The objective of the proposed trial is to confirm the efficacy and safety of the investigational product in patients diagnosed with LSCD.

# Inclusion and Exclusion Criteria

Patients who satisfy all of the inclusion criteria and none of exclusion criteria listed as follows are eligible for the trial: In addition, the investigational product is transplanted only in one eye. When bilateral eyes meet the transplantation criteria, the following items are referred to as the following items, and it is judged comprehensively after consulting with the patient:

・ Visual acuity

・ Corneal stromal opacity

・ Cataract

・ Tear fluid volume, etc.

## Inclusion Criteria

Patients diagnosed with LSCD classification Stage III.

Figure 1

| 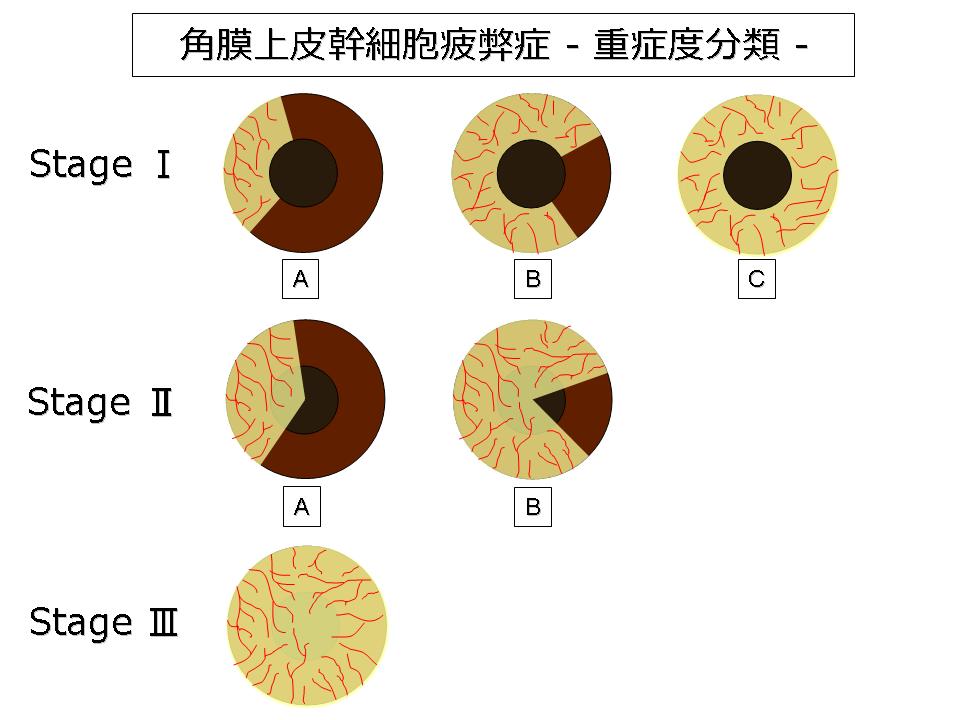 Stages of LSCD | Stage I: No conjunctivalization is present in the center of the cornea (diameter 5 mm), and the percentage of conjunctivalization in the corneal limbus is as follows: A: <50% B: ≥50% and <100% C: 100%  Stage II: Conjunctivalization is present in the center of the cornea (diameter 5 mm), and the percentage of conjunctivalization in the corneal limbus is as follows: A: <50% B: ≥50% and <100%  Stage III: The whole corneal surface is covered by conjunctival tissue. |
| --- | --- |

Patients who don't have extensive oral mucosal scarring and have healthy oral mucosal tissue for harvest.

Patients ≥20 years old at the time of informed consent

[Rationale for setting]

Patients with LSCD of the severity classification Stage III were set because the corneal epithelium has completely disappeared, simple treatment such as conjunctival epithelial scraping has not been successful, and treatment using cultured oral mucosal epithelial cell sheets is applicable.

The normal oral mucosal tissue of the patient is necessary for manufacturing of the investigational product.

This criterion is defined for the following reasons:

- The patient can understand the details of the trial and decide participation in the trial voluntarily.
- The patient can understand and answer properly the QOL questionnaires.

## Exclusion Criteria

Antibacterial drugs, corticosteroids, or anesthetic drugs used in the trial are contraindicated.

Hypersensitivity to antibiotics of penicillin, kanamycin, streptomycin, and amphotericin B, or history of hypersensitivity to penicillin antibiotics or aminoglycoside antibiotics

History of hypersensitivity to animals (cows, mice, or pigs)

History of malignant tumor within 5 years prior to screening, or currently suspected with malignant tumor

Glaucoma with poorly controlled intraocular pressure

Diabetes mellitus with poor glycemic control

Defect in central vision of the eye to which the investigational product is to be implanted (target eye).

Treatment-resistant, severe decrease in tear

Intraocular surgery is scheduled in the trial period.

Severe abnormality in eyelid of the target eye

Any concurrent medical condition in the target eye or the whole body which may interfere with proper evaluation of the trial treatment, in the opinion of the investigator or subinvestigator

Pregnant women, lactating women, women who are possibly pregnant, or women who want to be pregnant during the trial period

Patients who have participated in another clinical trial within 16 weeks prior to transplantation of the investigational product, who are participating in another clinical trial at transplantation of the investigational product, or who have a schedule to participate in another clinical trial during participation in the present trial

Other patients who are not eligible for the trial, in the opinion of the investigator or subinvestigator

[Rationale for setting]

To ensure safety of the patients, because anesthetic drugs, antibacterial drugs, and corticosteroids are necessary following transplantation of the investigational product

To ensure safety of the patients, because the possibility of hypersensitivity or allergic reaction induced by residual antibiotics in the investigational product cannot be completely ruled out

To ensure safety of the patients, because the possibility of hypersensitivity or allergic reaction induced by residual materials of animal origin in the investigational product cannot be completely ruled out

To ensure safety of the patients. In general, malignant tumor can be considered to have been completely cured when there is no recurrence 5 years after treatment.

To ensure safety of the patients, because glaucoma may worsen because of increase in intraocular pressure by corticosteroid22) administered after transplantation of the investigational product

Diabetes mellitus may be complicated with corneal epithelium disorder or retinal disorder23), which may interfere with proper evaluation of efficacy and safety of the trial treatment.

Defect in the central vision of the target eye may interfere with proper evaluation of efficacy of the trial treatment.

Corneal epithelium disorder may occur associated with treatment-resistant, severe decrease in tear24), which may interfere with proper evaluation of efficacy and safety of the trial treatment.

Intraocular surgery for cataract or retina and vitreous disorder may interfere with proper evaluation of efficacy and safety of the trial treatment.

Abnormality in the eyelid of the target eye requiring treatment may interfere with proper evaluation of efficacy and safety of the trial treatment22, 25).

Concurrent systemic serious medical conditions such as metabolic/endocrine disorder, hematologic disease or hepatic disorder, or unexpected complication in the target eye such as keratinization of the wide range of the corneal surface25) may interfere with proper evaluation of efficacy and safety of the trial treatment.

To ensure safety of the patients

Repeated participation in clinical studies is ethically not acceptable, and such participation may interfere with proper evaluation of efficacy and safety of the trial treatment.

General consideration for a clinical trial.

# Notification to Other Physicians

Before the start of the trial, the investigator or subinvestigator should confirm whether the patient receives treatment from other physicians or not. If the patient receives any treatment, the investigator or subinvestigator should notify the physicians that the patient is going to participate in the proposed trial, after obtaining consent from the patient.

# Trial Procedure

## Enrollment of the Subjects and Discussion of the Transplantation Plan

Enrollment of the subjects and discussion of the transplantation plan are completed as follows. Details are defined in a separate procedure.

The investigator or subinvestigator obtains written informed consent to participation in the clinical trial from a candidate patient, evaluates eligibility, fills in an eligibility evaluation form for enrollment of subjects (Attachment 6), and sends it to the registration center. A serial registration number (consisting of an alphabet and a figure, e.g., A-1) is assigned when informed consent is obtained. The alphabet is assigned by the registration center at each trial site. The figure is assigned sequentially to each patient, in the order of obtaining the informed consent at each trial site.

Registration center

Japan Tissue Engineering Co., Ltd.


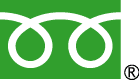
0120-917-721 TEL: 0533-66-2140 FAX: 0533-66-2134

Each trial site sends photos of the anterior ocular segment taken at screening to the registration data center. The registration data center masks the information of the subject on the photos of the anterior ocular segment and uploads the photos to a server for the eligibility evaluation committee.

Registration data center

Yumiko Nemoto

Consulting Business Unit, East Japan Medical Writing Department

Cmic Holdings Co., Ltd.

TEL: 03-6779-8118 FAX: 03-6683-7795

The eligibility evaluation committee confirms eligibility of the subject selected by the investigator or subinvestigator, based on the photos of the anterior ocular segment uploaded on the server. The result of evaluation by the eligibility evaluation committee is sent to the registration data center, which in turn prepares a notification of eligibility results and sends it to the registration center.

The registration center confirms eligibility of the subject based on the eligibility evaluation form for enrollment of subjects and the notification of eligibility results and registers eligible subjects.

The monitor verifies again the eligibility of the subject, based on the eligibility evaluation form for enrollment of subjects and the notification of eligibility results sent from the registration center. The investigator or subinvestigator stores the eligibility evaluation form for enrollment of subjects, together with the medical record.

The investigator or subinvestigator decides schedule of transplantation of the investigational product after discussion with the registration center.

## Eligibility Evaluation Committee

The eligibility evaluation committee is established to evaluate the eligibility of subjects independently from each trial site. The committee ensures that eligible subjects are selected at screening. Details are defined in a separate procedure.

## Collection of the Biopsy Sample

The investigational product manager receives the tissue transportation set from the monitor and verifies integrity of the set.

Before biopsy, the subject's blood (approximately 3 mL) is collected in a blood storage tube, which is used to investigate cause if the subject experiences infection postoperatively.

The investigator or subinvestigator collects a biopsy sample of the oral mucosal tissue (Oral mucosal tissue with no apparent scarring or inflammatory findings from the investigator or subinvestigator approximately 10 ×5 mm and put it into a tissue transportation tube. Tissue collection is carried out by hospitalization, and the scheduled hospitalization period is about 5 to 6 days.

The tissue transportation set containing the subject's biopsy sample and blood is immediately put into an insulated container for transportation, which is handed to the monitor.

If any inconformity to the test or release specification is detected during manufacturing of the investigational products, the investigator or subinvestigator discusses with the registration center and collects the biopsy sample, as necessary.

## Transplantation of the Investigational product

The investigational product manager receives the investigational product from the monitor, the primary packaging of the investigational product is removed from the secondary packaging and the condition of the product storage solution (there are no turbidity or foreign matter) is confirmed. The solution with any turbidity or foreign matter must not be used.

The product is transplanted under local anesthesia or systemic anesthesia. Transplantation of investigational products will carried out by hospitalization, and the expected hospitalization period should be about 3~6 weeks.

The conjunctival pannus is completely removed from the cornea of the injured eye, as far as possible.

Symblepharon, if any, is treated simultaneously. Conjunctival sac plasty or amniotic membrane transplantation to the sclera is performed simultaneously, as necessary.

The dish holder is lifted using sterilized forceps and put on a clean temperature-responsive culture dish.

The ear of the ring-shaped culture disc is lifted using sterilized forceps to carefully remove the cell sheet in the culture ring. The cell sheet must be transplanted without reversing the top and bottom of the ring-shaped culture disc on the temperature-responsive culture dish.

The cell sheet in the center of the ring-shaped culture disc is placed on the transplantation site; the ring-shaped culture disc is cut along the inner diameter using scalpel, scissors, or trepan to remove; and the cell sheet is left as it is for approximately 15 minutes. Attachment of the cultured oral mucosal epithelium cell sheet to the transplantation site is confirmed.

After transplantation, a soft therapeutic contact lens is placed, tarsorrphaphy is performed as necessary, the eyelid is closed and fixed, and the subject is placed at rest.

## Evaluation/Observation Period

The efficacy and safety of the trial treatment are observed for 52 weeks.

[Rationale for setting]

On the basis of the following, 52 weeks is considered to be enough for evaluation of efficacy and safety of the trial treatment:

According to the report on the long-term results of cultured oral mucosal epithelial transplantation, conjunctivalization, corneal opacity, and corneal neovascularization is stable and have little change more than 1 year after surgery26).

According to a clinical research conducted outside Japan, survival and long-term therapeutic effect of cultivated autologous oral mucosal epithelial cell sheet on the eye with LSCD can be demonstrated when the reconstructed corneal epithelium is stable for 1 year after transplantation27).

In general, approximately 6 months of follow-up is necessary after ophthalmologic surgery. It is considered that 52 weeks is enough for evaluation of safety.

## Investigational product

### Investigational product

##### Development code

COMET01

##### Non-proprietary name

Human autograft (cultivated autologous oral mucosal epithelial cell sheet)

##### Package

The investigational product is attached to a dish holder and aseptically packed in the primary package together with the product storage solution, and each primary package is contained in the outer package (secondary package).

##### Package and label

Labels are attached to the primary and secondary packages of the investigational product.

##### Storage condition and expiration date

Storage condition: 20°C–28°C

Expiration date: 60 hours after completion of the primary packaging

##### Dispensing of the investigational product

The investigational product is dispensed by the trial product provider.

##### Management of the investigational product

The investigational product manager is responsible for the management of the investigational product provided from the trial product provider to the trial site, according to the “Procedure for management of the investigational product” provided from the coordinating investigator. The investigational product manager manages the unused investigational product and package of the product after use. The investigator and investigational product manager check the information entered in the investigational product management table and Case Report Form (CRF) against the information on the product actually retrieved or disposed; immediately investigate the cause of inconsistency, if any; and document the occurrence of inconsistency and its reason.

### Other Components for the Investigational product

#### Tissue Transportation Set

The tissue transportation set comprises a tissue transportation tube. The tissue transportation tube is filled with tissue transportation solution. Label is attached to the tissue transportation.

##### Storage condition and expiration date of the tissue transportation set:

Storage condition: 2°C–20°C

Expiration date: 84 hours (from shipment of a temperature-controlled container to acceptance of the oral mucosal tissue)

##### Dispensing of the tissue transportation set

The tissue transportation set is dispensed from the trial product provider.

##### Management of the tissue transportation set

The investigational product manager is responsible for the management of the tissue transportation set provided from the trial product provider to the trial site, according to the “Procedure for management of the investigational product” provided from the coordinating investigator. The investigator and investigational product manager check the consistency of the information entered in the investigational product management table and CRF; immediately investigate the cause of inconsistency, if any; and document the occurrence of inconsistency and its reason.

## Criteria and Procedure for Trial Discontinuation of Individual Subject

### Discontinuation Criteria

In the event of any of the following items, the investigator or subinvestigator should discontinue the trial of the relevant subject.

When the subject wants to discontinue the withdraw consent

When the subject experiences unacceptable adverse event

When the investigational product shows poor performance, or the condition of the subject worsens, and the trial should be discontinued in the opinion of the investigator or subinvestigator

When ineligibility of the subject is revealed after the start of the trial

When the subject is lost during follow-up because he/she does not visit the trial site

If the subject becomes pregnant before the investigational product is transplanted

Other cases where the investigator or subinvestigator considers it necessary to discontinue the trial

Select main reason for discontinuation from the following seven items:

Withdrawal of the consent

Adverse event

Worsening of condition, insufficient performance

Ineligibility of the subject

Lost to follow-up

Pregnancy before investigational product transplantation

Others

### Procedure and Follow-up of the Subject who Discontinues the Trial Prematurely

Appropriate action should be taken for the subject according to reason for discontinuation, and mandatory examination/survey at the end of the trial should be completed within 7 days after discontinuation as far as practicable to evaluate the condition of the subject at the time of discontinuation, and the result is documented in the CRF.

Follow-up of the subject is continued after discontinuation of the trial as far as practicable, regardless of the reason for discontinuation, and the results are entered in the CRF. If a subject discontinued the trial for reason of an adverse event, he/she should be followed up until his/her condition/laboratory values improve or stabilize as far as practicable. If a subject does not come to the trial site in the course of the trial, the reason and clinical course is followed up using an appropriate method (e.g., phone calling), and the results are documented in the medical record and CRF.

## Clinical Trial Discontinuation and Suspension Standards and Procedures at the Trial Site

### Discontinuation Criteria

When critical or repeated deviation or violation of the protocol/trial contract is detected and not corrected

Occurrence of an ethically or clinically uncontrollable issue that requires discontinuation of the trial to ensure safety of the subject

### Registration suspension criteria

When there is more than one month before a new clinical trial investigator is selected due to a move of clinical trial liability doctor, etc.

### Discontinuation or Suspension Procedures

If the investigator discontinues/suspends the trial, he/she will promptly inform the head of the trial site in writing and explain the details.

If the head of the trial site receives a notification of discontinuation/suspension of the trial from the investigator, he/she will promptly inform the IRB in writing and explain the details.

If the trial is discontinued/suspended, the investigator will promptly inform the subjects and conduct appropriate therapy and follow-up.

## Concomitant Drugs/Therapies

### Acceptable Concomitant Drugs/Therapies

For the drugs concomitantly used during the trial period, the name, administration route, and period and purpose of use are documented in the CRF. For the therapies concomitantly used during the trial period, the name and period and purpose of use are documented in the CRF.

### Prohibited Concomitant Drugs

Use of the following drugs in bilateral eyes is prohibited during the trial period, because they may interfere with evaluation of the trial treatment:

Non-steroidal anti-inflammatory eye drops

Drugs for glaucoma with potent effect to injure the epithelium: timolol maleate, betaxolol hydrochloride, and isopropyl unoprostone

Artificial tear-containing preservative

### Prohibited Concomitant Therapies

Use of the following therapies in bilateral eyes is prohibited during the trial period, because they may interfere with evaluation of the trial treatment:

Corneal transplantation

Curettage of the conjunctival epithelium from the cornea

Amniotic membrane transplantation to the cornea

Instillation of autologous serum

## Pregnancy during clinical trials

The doctor in charge instructs the subject to contraception in one of the following ways from obtaining consent to the end of follow-up or discontinuation date. Subjects are properly guided by their doctor on contraceptive methods.

Use condoms with spermicides

Take oral contraceptives

If the subject becomes pregnant after implanting the investigational product, the clinical trial of the subject is continued to follow up. If the subject's partner becomes pregnant, the partner will also be examined appropriately.

# Schedule and Items of Test/Observation

## Survey Items Regarding Demographics and Other Baseline Characteristics (Subject's Background)

Information on the following items is collected after obtaining the informed consent:

Date when informed consent was obtained from the subject

Date of birth

Sex

Cause of LSCD

Complications in the eye and its severity
Information on the eye disease ongoing at the time of informed consent is collected.

Concomitant medical condition at any site other than the eyes and its severity
Information on the disease ongoing at the time of informed consent is collected.

History of eye disease
Information on the history of eye disease that may have influence on the evaluation of efficacy and safety of the trial treatment is collected.

History of disease at any site other than the eyes
Information on the history of disease that may have influence on the evaluation of efficacy and safety of the trial treatment is collected.

History of eye surgery
Information on the history of eye surgery that may have influence on the evaluation of efficacy and safety of the trial treatment is collected.

Information on biopsy (biopsy site)

Information on the transplantation of the investigational product (target eye)

## Photography of the Anterior Ocular Segment

Target of photography: bilateral eyes

Time of photography: screening; date of biopsy (after biopsy); date of investigational product transplantation (before, during*1, and after*2 transplantation); Weeks 2, 4, 12, 24, and 52 after transplantation; and at discontinuation
*1 The target eye only (after conjunctival epithelial scraping)
*2 The target eye only

## Survey Items Regarding Efficacy

##### Evaluation of severity of LSCD according to LSCD classification

Target of evaluation: bilateral eyes

Time of evaluation: screening; Weeks 2, 4, 12, 24, and 52 after transplantation; and at discontinuation

Evaluation method: Severity is evaluated according to LSCD classification (Figure 1).

##### Subjective symptoms

Target of evaluation: bilateral eyes

Time of evaluation: screening; Weeks 2, 4, 12, 24, and 52 after transplantation; and at discontinuation

Evaluation items: eye pain, foreign body sensation, teary eyes, photophobia, dry eye sensation, and discomfort in the eye

Evaluation method: Severity is evaluated according to the following criteria:

Criteria of severity:

0: No symptom

1: Mild symptom

2: Moderate symptom

3: Severe symptom

4: Markedly severe symptom

##### Corrected visual acuity

Target of evaluation: bilateral eyes

Time of evaluation: screening; Weeks 2, 4, 12, 24, and 52 after transplantation; and at discontinuation

Evaluation method: The corrected visual acuity is measured using the conventional Landolt ring chart specified in JIS T 7309 and Early Treatment Diabetic Retinopathy Study (ETDRS) chart

##### Evaluation of QOL

Time of evaluation: screening; Week 52 after transplantation, and at discontinuation

Evaluation method: The subject answers to the NEI VFQ-25 Japanese version (v 1.4) questionnaire.

##### Severity of corneal opacity

Target of evaluation: bilateral eyes

Time of evaluation: screening; Weeks 2, 4, 12, 24, and 52 after transplantation; and at discontinuation

Evaluation method: Severity is evaluated according to the following criteria:

Criteria of severity:

Grade 0: The cornea is transparent, and the iris can be observed in detail.

Grade 1: The details of the iris are not partially observed

Grade 2: The details of iris cannot be clearly observed, and the rim of the pupil is scarcely observed.

Grade 3: Neither the iris nor rim of the pupil can be observed.

##### Severity of corneal neovascularization

Target of evaluation: bilateral eyes

Time of evaluation: screening; Weeks 2, 4, 12, 24, and 52 after transplantation; and at discontinuation

Evaluation method: Severity is evaluated according to the following criteria:

Criteria of severity:

Grade 0: No neovascularization

Grade 1: Neovascularization around the cornea

Grade 2: Neovascularization to the rim of the pupil

Grade 3: Neovascularization exceeding the rim of the pupil

##### Severity of symblepharon

Target of evaluation: bilateral eyes

Time of evaluation: screening; Weeks 2, 4, 12, 24, and 52 after transplantation; and at discontinuation

Evaluation method: Severity is evaluated according to the following criteria:

Criteria of severity:

Grade 0: No symblepharon

Grade 1: Symblepharon limited to the surface of the conjunctiva

Grade 2: Symblepharon <1/2 of the surface of the cornea

Grade 3: Symblepharon ≥1/2 of the surface of the cornea

##### Whether additional treatment is indicated or not, for improvement of visual acuity

Target of evaluation: target eye

Time of evaluation: Week 52 after transplantation and at discontinuation

Evaluation method: Whether additional treatment (corneal transplantation or curettage of the conjunctival epithelium from the cornea) is indicated or not is evaluated on the basis of the condition of the reconstructed corneal epithelium.

## Survey Items Regarding Safety

In this trial, the “observation period” is the period from the informed consent to transplantation of the investigational product, and the “treatment period” is the period from transplantation of the investigational product to Week 52 after transplantation, date of discontinuation, or the end of the follow-up for adverse event.

##### Significant safety endpoints

Superficial punctate keratopathy

Target of evaluation: bilateral eyes

Time of evaluation: screening; Weeks 2, 4, 12, 24, and 52 after transplantation; and at discontinuation

Evaluation method: Severity is evaluated according to the following criteria:

Criteria of severity:

Grade 0: A0D0

Grade 1: A1D1

Grade 2: A2D1 and A1D2

Grade 3: A1D3, A2D2, and A3D1

Grade 4: A2D3 and A3D2

Grade 5: A3D3

| <Evaluation criteria>  Area: the affected area (total area)  A0: no punctate staining (normal)  A1: punctate fluorescein staining in ≤1/3 of the cornea  A2: punctate fluorescein staining in >1/3 and <2/3 of the cornea  A3: punctate fluorescein staining in ≥2/3 of the cornea  Density: density of punctate staining  D0: no punctate staining (normal)  D1: sparse staining (discrete punctate fluorescein staining)  D2: moderate (between D1 and D3)  D3: thick (confluent punctate fluorescein staining) |
| --- |

Corneal epithelial defect

Target of evaluation: bilateral eyes

Time of evaluation: screening; Weeks 2, 4, 12, 24, and 52 after transplantation; and at discontinuation

Evaluation method: Severity is evaluated according to the following criteria:

Criteria of severity:

Grade 0: no corneal epithelial defect

Grade 1: corneal epithelial defect in <1/4 of the surface of the cornea

Grade 2: corneal epithelial defect in ≥1/4 and <1/2 of the surface of the cornea

Grade 3: corneal epithelial defect in ≥1/2 of the surface of the cornea

Corneal keratinization

Target of evaluation: bilateral eyes

Time of evaluation: screening; Weeks 2, 4, 12, 24, and 52 after transplantation; and at discontinuation

Evaluation method: Severity is evaluated according to the following criteria:

Criteria of severity:

Grade 0: no corneal keratization

Grade 1: keratization of less than 1/4 of the surface of the cornea

Grade 2: keratization defect in ≥1/4 and <1/2 of the surface of the cornea

Grade 3: keratization defect in ≥1/2 of the surface of the cornea

Conjunctival injection

Target of evaluation: bilateral eyes

Time of evaluation: screening; Weeks 2, 4, 12, 24, and 52 after transplantation; and at discontinuation

Evaluation method: Severity is evaluated according to the following criteria:

Criteria of severity:

Grade 0: no Conjunctival injection

Grade 1: mild (mild or partial conjunctival blood vessel hyperemia)

Grade 2: moderate (hyperemia of diffuse conjunctival blood vessels)

Grade 3: severe (marked conjunctival blood vessel hyperemia)

Infectious keratitis

Target of evaluation: bilateral eyes

Time of evaluation: screening; Weeks 2, 4, 12, 24, and 52 after transplantation; and at discontinuation

Evaluation method: Severity is evaluated according to the following criteria:

Criteria of severity:

Grade 0: no infection

Grade 1: require the eye drops

Grade 2: requires systemic administration

Grade 3: require surgery

Endophthalmitis

Target of evaluation: bilateral eyes

Time of evaluation: screening; Weeks 2, 4, 12, 24, and 52 after transplantation; and at discontinuation

Evaluation method: Severity is evaluated according to the following criteria:

Criteria of severity:

Grade 0: no endophthalmitis

Grade 1: with endophthalmitis

##### Adverse events

Information on adverse events that occur during the observation period and those that occur during the treatment period (including an adverse event that occurs during the observation period and worsens during the treatment period) is collected. Among the adverse events, those of which causal relationship with the investigational product cannot be ruled out are considered as malfunctions.

##### Important malfunctions

Risks specific to the following cellular/tissue-based products are surveyed:

Tumor lesion of which causal relationship with the investigational product cannot be ruled out at the transplantation site

Allergic reaction of which causal relationship with the investigational product cannot be ruled out

Cryptogenic and unknown infection of which causal relationship with the investigational product cannot be ruled out

In the event of any one of the aforementioned abnormalities, the investigator or subinvestigator reports accordingly to the head of the trial site and trial product provider, in a similar manner as that of a report of a serious adverse event.

##### Laboratory tests (hematology, biochemistry, and immunoserology)

Time of test: screening; date of investigational product transplantation (after transplantation), Week 52 after transplantation, and at discontinuation

* For women who can conceive, a urine test is performed on the screening date before transplantation of the investigational product.

Evaluation method: The following test items are measured at the trial site.

Hematology
Parameters: red blood cell count; white blood cell count; differential white blood cell count (neutrophils, eosinophils, basophils, and lymphocytes); and hemoglobin, hematocrit, and platelet counts

Biochemistry
Parameters: AST (GOT), ALT (GPT), serum total protein, and serum creatinine

Immunoserology
Parameter: C-reactive protein (CRP)

##### Intraoral observation

Time of test: Screening date, the day after oral mucosal tissue collection, 2 weeks of investigational product transplantation.

Evaluation method: Check for infection, marked inflammation, and wound healing.

## Test/Observation Schedule

Tests/observation are completed according to the following schedule, and the results are documented in the CRF.

| Time  Observation | Observation period | | | | | Follow-up period | | | | | | Dis-continua-tion |
| --- | --- | --- | --- | --- | --- | --- | --- | --- | --- | --- | --- | --- |
| Visit 1 | Visit 2 | | Visit 3 | | | Visit 4 | Visit 5 | Visit 6 | Visit 7 | Visit 8 |
| Informed consent, screening | Biopsy | | Transplantation of the investigational product | | | Week 2 | Week 4 | Week 12 | Week 24 | Week 52 |
| Before biopsy | After biopsy | Before trans-plantation | During trans-plantation | After trans-plantation | (Days 14±3) | (Days 28±3) | (Days 84±14) | (Days 168±14) | (Days 364±28) | (within +7 days) |
|  | (Day 0) |  |
| Subject's background | ⚫ |  |  |  |  | ⚫ |  |  |  |  |  |  |
| Evaluation of eligibility | ⚫ |  |  |  |  |  |  |  |  |  |  |  |
| Laboratory tests | ⚫*1 | ▲ |  | ⚫*1, 3 |  | ⚫ |  |  |  |  | ⚫ | ⚫ |
| Intraoral observation | ⚫ |  | ⚫*2 |  |  |  | ⚫ |  |  |  |  |  |
| Corrected visual acuity | 🞋 |  |  |  |  |  | 🞋 | 🞋 | 🞋 | 🞋 | 🞋 | 🞋 |
| Photography of the anterior ocular segment | 🞋 |  |  | 🞋*3 | ◼ | ◼ | 🞋 | 🞋 | 🞋 | 🞋 | 🞋 | 🞋 |
| Evaluation of severity of LSCD according to LSCD classification | 🞋 |  |  |  |  |  | 🞋 | 🞋 | 🞋 | 🞋 | 🞋 | 🞋 |
| Subjective symptoms | 🞋 |  |  |  |  |  | 🞋 | 🞋 | 🞋 | 🞋 | 🞋 | 🞋 |
| Evaluation of QOL | ⚫ |  |  |  |  |  |  |  |  |  | ⚫ | ⚫ |
| Severity of corneal opacity | 🞋 |  |  |  |  |  | 🞋 | 🞋 | 🞋 | 🞋 | 🞋 | 🞋 |
| Severity of corneal neovascularization | 🞋 |  |  |  |  |  | 🞋 | 🞋 | 🞋 | 🞋 | 🞋 | 🞋 |
| Severity of symblepharon | 🞋 |  |  |  |  |  | 🞋 | 🞋 | 🞋 | 🞋 | 🞋 | 🞋 |
| Whether additional treatment to improve visual acuity is indicated or not |  |  |  |  |  |  |  |  |  |  | ◼ | ◼ |
| Safety endpoints | 🞋 |  |  |  |  |  | 🞋 | 🞋 | 🞋 | 🞋 | 🞋 | 🞋 |
| Important malfunctions |  |  |  |  |  | ⚫ | ⚫ | ⚫ | ⚫ | ⚫ | ⚫ | ⚫ |
| Adverse events |  |  | ⚫ |  |  |  |  |  | ⚫ |  |  |  |

⚫: Implementation, ◼: For the target eye, 🞋: For bilateral eyes, ▲: Blood sampling only

*1 : Urine pregnancy test is necessary for women subjects with childbearing potential.

*2 : Performed the day after collection of oral mucosal tissue

*3 : Within −4 days prior to transplantation of the investigational product

# Evaluation of Efficacy and Safety

## Evaluation of Efficacy

### Primary Endpoint

Success rate of corneal epithelium reconstruction (%) at Week 52 after transplantation of the investigational product

The condition of the target eye after transplantation is evaluated according to LSCD classification, and eyes evaluated as Stage IA to C are considered to be successful.

[Rationale for setting]

The clinical symptoms (subjective symptoms and visual impairment) associated with LSCD is caused by conjunctivalization of the corneal epithelium. To improve this condition, a treatment aiming at corneal epithelium reconstruction is used. This follows that efficacy of the investigational product can be demonstrated by the success rate of corneal epithelium reconstruction after transplantation.

### Secondary Endpoints

Number of subjects by severity of LSCD at Week 52 after transplantation of the investigational product

Subjective symptoms

Corrected visual acuity

Evaluation of QOL

Severity of corneal opacity

Severity of corneal neovascularization

Severity of symblepharon

Whether additional treatment to improve visual acuity is indicated or not at Week 52 after transplantation of the investigational product or at trial discontinuation

Severity of LSCD in the fellow eye, subjective symptoms, corrected vision, degree of corneal opacity, degree of corneal neovascularization, degree of symblepharon

[Rationale for setting]

It is expected that the condition of LSCD is alleviated by transplantation of the investigational product.

It is known that subjective symptoms associated with LSCD are caused by conjunctivalization of the corneal epithelium. It is expected that subjective symptoms can be alleviated when the corneal epithelium is reconstructed after transplantation of the investigational product.

Visual impairment associated with LSCD is caused by conjunctivalization of the corneal epithelium. It is expected that visual acuity is improved after reconstruction of the transparent corneal epithelium after transplantation of the investigational product.

To evaluate improvement in QOL associated with alleviation of subjective symptoms and improvement in visual acuity after corneal epithelium reconstruction

To evaluate corneal opacity after transplantation of the investigational product and to evaluate its relationship with improvement in visual acuity

Corneal neovascularization in LSCD is associated with conjunctivalization of the corneal epithelium. It is expected that corneal neovascularization can be controlled by corneal epithelium reconstruction after transplantation of the investigational product.

Symblepharon is seen as a complication in some patients with LSCD. This condition is treated at the time of transplantation, and it is expected that recurrence of symblepharon can be prevented when the corneal epithelium is reconstructed by transplantation of the investigational product.

In LSCD with opacity of the corneal stroma, corneal transplantation may follow corneal epithelium reconstruction by transplantation of the investigational product, aiming at improvement in visual acuity. Although corneal transplantation is contraindicated in LSCD, it may become possible when the corneal epithelium is reconstructed by the trial treatment. Other additional treatments to improve visual acuity may become possible after corneal epithelium reconstruction by transplantation of the investigational product.

It was set to evaluate the expected clinical course when the investigational product was not applied.

## Evaluation of Safety

Significant safety endpoints

Superficial punctate keratopathy: the number of subjects and incidence (%)

Corneal epithelial defect: the number of subjects and incidence (%)

Corneal keratinization: the number of subjects and incidence (%)

Conjunctival injection: the number of subjects and incidence (%)

Infectious keratitis: the number of subjects and incidence (%)

Endophthalmitis: the number of subjects and incidence (%)

Adverse events and malfunctions: the number of subjects and incidence (%)

Important malfunctions: the number of subjects and incidence (%)

[Rationale for setting]

These conditions may occur after transplantation of the investigational product and important for safety of the investigational product.

In general, information on adverse events is collected for evaluation of safety of trial treatment.

The investigational product is a cellular/tissue-based product manufactured from the oral mucosal tissue collected from the subject himself/herself and used for local treatment of the cornea. It has no pharmacological effect on the whole body or other organs. Therefore, the following risks specific for this type of products are investigated for evaluation of safety, because toxicity relating to metabolism or excretion is not relevant:

Tumor lesion of which causal relationship with the investigational product cannot be ruled out at the transplantation site

Allergic reaction of which causal relationship with the investigational product cannot be ruled out

Cryptogenic and unknown infection of which causal relationship with the investigational product cannot be ruled out

Item [1] was defined to monitor the tumor lesion that may originate from cells contained in the investigational product throughout the trial period.

For item [2], although subjects with a history of allergic reaction to animals or antibiotics are not enrolled in this trial, risk of allergic reactions (anaphylaxis) cannot be completely ruled out because materials of animal origin (bovine serum, mouse-derived cells, and pig pancreas-derived trypsin) are used for manufacturing of the investigational product. Item [2] was defined to monitor allergic reactions throughout the trial period.

For item [3], risk of known zoonosis or cryptogenic and unknown infection cannot be completely ruled out. Item [3] was defined to monitor any occurrence of such infections throughout the trial period.

## Response Assessment Committee

The response assessment committee is established to evaluate the severity of LSCD according to LSCD severity classification, one of efficacy endpoints, and independently from the trial site. The response assessment committee uses photos with subjects and time points randomized and masked in advance to evaluate the severity.

If there is any discrepancy in the evaluation between the response assessment committee and the investigator/subinvestigator, the evaluation by the response assessment committee precedes. Details are defined in a separate written procedure.

# Measures for Adverse Events and Malfunctions

## Definition of Adverse Event and Malfunction

### Adverse Event

An adverse event is any unfavorable and unintended sign (including an abnormal laboratory finding), symptom, or disease that occurs during the trial period, whether or not considered related to the investigational product.

In this trial, an event of Grade ≥1 of CTCAE v4.028), the severity criteria for adverse events, will be defined as an adverse event and collected. However, events localized in the eye will be classified into three levels of severity (mild, moderate, or severe), and a mild or severer event will be defined as an adverse event and collected.

If pre-existing complication observed on the day of informed consent worsens during the trial period, it will also be defined as an adverse event and collected.

If an event disappears once and then reappears, or if an event emerges during the observation period and worsens during the treatment period, the event that reappears or worsens will be handled as a new adverse event.

Separately from the adverse events assessed from the viewpoint of subjects' health injury, the presence or absence of malfunctions of the product will also be assessed. Product defects may not be broadly unwell, such as malfunctions in the function of the test product, side effects of cells on the human body, etc., and may not be caused by manufacturing, delivery, storage or use., and those that occur before transplantation of the investigational product.

The term of adverse events used by investigators or investigators is replaced with standard terms using MedDRA/J for aggregation and analysis. The medical validity of the rereading operation is determined by the coordinating investigator or the investigator.

### Malfunction

An adverse event for which a causal relationship with the investigational product cannot be ruled out is defined as a malfunction.

### Serious Adverse Events

A serious adverse event is any adverse event that

results in death;

is life-threatening;
The term “life-threatening” here refers to an event in which the subject was at risk of death at the time of the event; it does not refer to an event that hypothetically might have caused death if it were more severe.

requires inpatient hospitalization or results in prolongation of existing hospitalization;

results in persistent or significant disability/incapacity;

is a congenital anomaly/birth defect; and

is a medically important event.
The term “a medically important event” here refers to an important medical event that might not be immediately life-threatening or result in death or hospitalization but might jeopardize the subject or might require intervention to prevent one of the other outcomes listed in the aforementioned definition.

## Criteria for Severity Assessment of Adverse Events

The investigator or subinvestigator will assess the severity of adverse events using CTCAE v4.0 Japanese version.

Adverse events localized in the eye will be classified into three levels of severity (mild, moderate, or severe) as follows:

- mild: signs or symptoms that are easily bearable,
- moderate: signs or symptoms that interfere with daily activities, and
- severe: signs or symptoms that hinder work or daily activities.

## Criteria for Causality Assessment

The causal relationship to the investigational product will be assessed according to the criteria shown in Table 3, and the reason(s) for the judgment will be recorded.

Table 3 Criteria for Assessing Causal Relationship to Investigational product

| Causal relationship to investigational product | Criteria for causality assessment |
| --- | --- |
| Can be ruled out | There is no relationship between the onset of the event and the investigational product; i.e., it can be medically explained that the factor(s) other than the investigational product, such as underlying disease, complication, concomitant drug, and concomitant therapy, is(are) highly involved. |
| Cannot be ruled out | The onset of the event is undeniably correlated with the investigational product and cannot be explained by underlying disease, complication, concomitant drug, or concomitant therapy. |

## Response and follow-up investigation when adverse events appear

The investigator or the subinvestigator shall provide appropriate first aid to adverse events expressed in the subject participating in the trial, pay attention to ensuring the safety of the subject, and take appropriate measures such as receiving a diagnosis by a specialist doctor as necessary, and endeavor to investigate the cause therein.

In addition, the case report describes the adverse event name, severity, expression date, outcome, outcome date, severity, causal relationship with the investigation product and tissue collection, causality determination reason, and, if necessary, details of treatment and progress. If the diagnosis name is identified from the signs or symptoms, give priority to the individual signs and symptoms. If the diagnosis name is not identified from the signs or symptoms, each sign and symptom is filled in as an individual adverse event.

As much as possible, follow-up investigations will be conducted on adverse events that have been developed, particularly events in which causal relationships with investigational product cannot be denied. Adverse events that develop during the clinical trial period are tracked until they are recovered or determined to be clinically unnecessary.

## Measures for Serious Adverse Events or Important Malfunctions

In the event of development of a “serious adverse event” or an “important malfunction,” the investigator or subinvestigator shall immediately take appropriate action to protect the subject, handle the adverse event or defect in accordance with the following procedure.

1. Report from investigators to the heads of trial site, coordinating investigator, and trial product provider

Regardless of causality, the investigator shall, in principle, report to the coordinating investigator by telephone (or email) within 24 hours of obtaining the adverse event or defect information. After that, promptly prepare a "Report on Serious Adverse Events" prescribed by the trial site and submit it to the head of the trial site, the coordinating investigator, and the investigational product provider. In this case, if the head of the trial site or the clinical trial examination committee, the coordinating investigator, the investigational product provider, etc. requests further necessary information, the investigator shall respond. In addition, if there is no provision of the reporting format, etc. at the trial site, " Serious Adverse Event Report form (first report)" Form 14) shall be used.

1. Notification by coordinating investigator to investigators responsible for each trial site

The coordinating investigator shall review the content of adverse events or defect reports obtained from the investigator and, in principle, notify the investigator of each other trial site within 24 hours of the adverse event or defect information.

1. Report to the Minister of Health, Labour and Welfare and the trial product provider of investigational product

If each facility clinical trial liability doctor consults with the examinee under the coordination of the coordinating investigator and determines that it is necessary to report to the Minister of Health, Labour and Welfare, it will be reported to the Minister of Health, Labour and Welfare (Pharmaceuticals and Medical Devices Agency) under the name of each facility clinical trial responsible doctor, and it will also be reported to the investigational product provider. The subject, method, and reporting deadline, etc. of the report to the Minister of Health, Labour and Welfare shall be in accordance with the "Procedure Manual for the Handling of Safety Information".

1. Report to the head of the trial site

When a report is made to the Minister of Health, Labour and Welfare regarding a serious adverse event or an important malfunction occurring at another trial site, the investigator shall report the contents of the report established by the Pharmaceuticals and Medical Devices Agency obtained from the coordinating investigator to the head of the trial site it as soon as possible.

1. What to do when you get additional information

If additional information about the adverse event or defect is obtained, the investigator of the medical institution in which the adverse event or the malfunction occurred shall make an additional report to the head of the trial site as soon as possible and report it to the coordinating investigator and the investigational product provider. In principle, the coordinating investigator will contact other trial site within 24 hours if additional information is obtained.

## Adverse Events Expressed in Previous Clinical Studies

The following is a list of adverse events that have been developed in clinical studies conducted so far in our group.

1. Corneal regeneration by cultivated autologous oral mucosal epithelial cell sheet transplantation (January, 2003 May, 2005) 20)

|  | Adverse event name | Total number of participants  (number of subjects: 4 cases) |
| --- | --- | --- |
| Eye symptoms and findings | Corneal neovascularization (target eye) | 4 |
| Corneal epithelial defect (target eye) | 4 |
| Eye pain (target eye) | 3 |
| Soft contact lens shedding (target eye) | 1 |
| Increased intraocular pressure (fellow eye) | 1 |
| Ophthalmalgia (fellow eye) | 1 |
| Systemic symptoms | Thromboembolism | 1 |
| Headache | 3 |
| Fever | 1 |
| Vomit | 1 |
| Ear pain | 1 |
| Frequent urination | 1 |
| Constipation | 2 |
| Diarrhea | 1 |
| Pain | 1 |
| Sleeplessness | 2 |
| Increased cholesterol | 1 |

1. Clinical study of autologous oral mucosal epithelial sheet transplantation for intractable corneal disease (July, 2005 February, 2007)21)

|  | Adverse event name | Total number of participants (number of subjects: 6 cases) |
| --- | --- | --- |
| Eye symptoms and findings | (Sheet transplantation)  Post-transplant eye pain, foreign matter sensation | 4 |
| (Amniotic removal)  Intraoperative epithelial sheet detachment | 1 |
| (Amniotic removal)  Postoperative pain, foreign matter sensation | 1 |
| Corneal epithelial defect | 3 |
| Eye pain, foreign matter sensation | 5 |
| Contact lens shedding | 10 |
| Inflammation of the surface of the eye | 2 |
| Conjunctival relaxation | 2 |
| High eye pressure | 1 |
| Double Anterior Chamber | 1 |
| Systemic symptoms | (Fat taken)　Intraoperative oxygen desaturation | 3 |
| (Fat taken)　Intraoperative heart rate drop | 1 |
| (Fat taken)　 Postoperative abdominal pain | 4 |
| (Fat taken)　 Postoperative subcutaneous hemorrhage | 1 |
| (Oral mucosa taken) Intraoperative heart rate drop | 1 |
| (Oral mucosa taken) Postoperative pain, discomfort | 4 |
| (Sheet transplantation) Increased blood pressure during transplantation | 2 |
| (Sheet transplantation) Oxygen desaturation during transplantation | 1 |
| (Sheet transplantation) Pain in the lower extremities during transplantation | 1 |
| (Sheet transplantation) Extra-phase contraction during transplantation | 1 |
| (Sheet transplantation) Decreased blood pressure during transplantation | 1 |
| (Sheet transplantation) Headache after transplantation | 1 |
| (Sheet transplantation) Chills after transplantation | 1 |
| (Sheet transplantation) Nausea, vomiting after transplantation | 3 |
| (Amniotic removal) Increased intraoperative blood pressure | 1 |
| Fever | 3 |
| Cold | 1 |
| Wet cough | 1 |
| Sore throat | 1 |
| Chest pain | 1 |
| Numbness in the hands | 1 |
| Numbness at the fingertips | 2 |
| Elbow pain | 1 |
| Constipation | 3 |
| Diarrhea | 1 |
| Sleepless | 2 |
| Fatigue | 1 |
| Malaise | 1 |
| Hepatic dysfunction | 2 |
| Bruises on the legs at home | 1 |

1. Clinical study of autologous oral mucosal epithelial sheet transplantation for LSCD (From February 2011 (*Interim data until December 2014))

|  | Adverse event name | Total number of participants (number of subjects: 21 cases) |
| --- | --- | --- |
| Eye symptoms and findings | Conjunctival injection | 51 |
| Symblepharon | 8 |
| Superficial punctate keratopathy | 31 |
| Corneal epithelial defect | 42 |
| Conjunctivation | 17 |
| Subjective symptoms (eye pain) | 20 |
| Subjective symptoms (foreign matter sensation) | 11 |
| Subjective symptoms (lacrimation) | 19 |
| Subjective symptoms (Photophobia) | 38 |
| Infectious keratitis | 1 |
| Postoperative pain | 3 |
| Soft contact lens shedding  Therapeutic contact lens shedding | 88 |
| Increased intraocular pressure (target eye) | 16 |
| Increased intraocular pressure (fellow eye) | 2 |
| Cataract (target eye) | 3 |
| Cataract (fellow eye) | 2 |
| Optic disc hemorrhage (target eye) | 1 |
| Reverse eyelashes (target eye) | 1 |
| Endothelial rejection (target eye) | 1 |
| Macular edema (target eye) | 3 |
| Systemic symptoms | Intracranial bleeding | 1 |
| Paresthesia | 2 |
| Acne in the face | 1 |
| Fever | 1 |
| Malaise | 1 |
| Nausea | 2 |
| Vomit | 1 |
| Dizziness | 1 |
| Tracheitis | 1 |
| Upper respiratory tract infection, inflammation | 7 |
| Cold | 2 |
| Otitis media | 1 |
| Rhinitis | 1 |
| Sinusitis | 1 |
| Left upper lip laceration | 1 |
| Abdominal pain | 1 |
| Lower back pain | 1 |
| Inguinal hernia | 1 |
| Bleeding from the urethra | 1 |
| Constipation | 1 |
| Sleepless | 1 |
| Extreme fatigue | 1 |
| Localized edema | 1 |
| Hypoglycemia | 1 |
| Leukocyte increase | 1 |
| Increased aspartate aminotransferase | 2 |
| Increased alanine aminotransferase (rise) | 3 |

# Compliance with, Deviations from, and Changes and Amendments of the Protocol

## Compliance with the Protocol

This clinical trial shall be conducted in compliance with this protocol, except in cases where medical care is unavoidable, such as to avoid the urgent danger of the subject.

## Deviations or Change from the Protocol

1. Investigators or subinvestigators shall not deviate or change from the protocol without written approval based on the prior examination of the IRB.
2. Investigators or subinvestigators may deviate or change the protocol without the prior approval of the IRB in the event of unavoidable medical circumstances, such as those to avoid the urgent danger of the subject. In that case, the investigator shall immediately submit a document describing the content and reason for the deviation or change to the head of the trial site and obtain the approval of the IRB.
3. The investigator or subinvestigator will document any deviation from the protocol regardless of the reason.

## Protocol Amendment

When the coordinating investigator recognizes the quality, efficacy and safety of the trial product and other information important for proper conduct of the clinical trial, or when instructed by the IRB to revise it, revise the protocol as necessary. When revising, a revision history is created and saved. The investigator submits the revised document to the head of the trial site and obtains the approval of the IRB. After approval by the IRB, the trial is conducted using the revised protocol

# Discontinuation or Suspension of the Entire Trial

## Discontinuation or Suspension Criteria

The investigator shall discontinue or suspend the entire clinical trial in the following cases:

If the head of the trial site receives the report of the IRB and decides that the clinical trial should not be continued and notifies the investigator, the trial will be discontinued.

If significant information is obtained that may adversely affect the safety of new subjects or the conduct of the trial, the trial will be suspended.

Development of the investigational product discontinued

If, for any other reason, the investigator determines that the trial should be discontinued or cannot be continued, the trial shall be discontinued.

## Discontinuation or Suspension Procedures

When the entire clinical trial is discontinued, the investigator stops registering a new subject and promptly reports the cancellation of the clinical trial in writing to the head of the trial site. In addition, the clinical trial of the subject in progress is discontinued when possible.

In the event of an interruption in the entire clinical trial, the investigator suspends the registration of a new subject and promptly reports the investigation interruption in writing to the head of the implementation medical institution. In addition, the clinical trial of the subject in progress is interrupted at a possible time.

# Completion of the Trial

The investigator submits the clinical trial end report to the head of the medical institution immediately after the end of the clinical trial.

The head of the trial site will promptly inform the IRB of the end-of-trial report submitted by the investigator.

# Trial Period

From July 15, 2015, to March 31, 2017

# Data Handling and Record Keeping

## Case Report Form

### Preparation of Case Report Forms

The investigator will ensure the accuracy, completeness, and legibility of the CRFs submitted and the verifiability of their entries from source documents.

Before preparation of CRFs, the investigator will prepare “Signature/Seal List.”

In preparation of CRFs, the investigator, subinvestigator, and clinical research coordinator will use the signature or seal registered in the “Signature/Seal List.”

After completion of the examinations/assessments determined in the trial schedule, the investigator, subinvestigator, or clinical research coordinator will promptly prepare CRFs of the trial according to the “Guidance on Preparation, Change, or Correction of Case Report Forms”.

### Correction of Case Report Forms

The investigator, subinvestigator, or clinical research coordinator will correct CRFs according to the “Guidance on Preparation, Change, or Correction of Case Report Forms.”

### Specification of Entries in the Case Report Forms to Be Regarded as Source Document

CRF entries or electronic data of 1)–8) as follows can be used as source document.

Severity of complication

Reason(s) for administration of concomitant drug/therapy

Judgment and comments on malfunctions of the product

Severity and seriousness of adverse events, judgment on the causal relationship between adverse events and the investigational product, and comments on adverse events

Photos

Information on the therapy administered and drug prescribed in other department or hospital

Reason(s) for discontinuation, measures taken and outcome after discontinuation, and record of action taken for subjects who did not make a visit

Other comments of the investigator and subinvestigator

## Record Keeping

The head of the trial site will properly maintain the trial documents and/or records to be retained at the trial site according to the rules of each trial site. The coordinating investigator and the investigator shall appropriately keep the records related to the trial to be preserved. The storage period will be until the date of marketing authorization of the product relevant to the investigational product or the date 3 years after the date of discontinuation or completion of the trial, whichever comes later.

Because the investigational product is a specified biological product, when the product is used, the name of the investigational product, manufacturing number, date(s) of use, name and address of the subject who used the product, etc., will be recorded at the trial site, and the record will be retained for at least 20 years from the date of use. The collected blood shall be preserved at Osaka University for 10 years.

In addition, based on the risk associated with cross-grafting on mouse fetal-derived 3T3-J2 cells used as feeder cells in the manufacturing process of the investigational product, the trial product provider stores a sample of the investigational product for at least 10 years to the validity period of the investigational product, and a record of the investigational product (record on manufacturing, quality test, delivery, collection, disposal) to the validity period of the investigational product for a period of 30 years.

## Acceptable Range of Test/Observation Schedule

The acceptable range of the test/observation schedule is shown in Table 4.

For the day of photography of the anterior ocular segment before transplantation of the investigational product, the acceptable range will be within −4 days of the scheduled day.

Table 4 Acceptable Range of Test/Observation Schedule

| Test/observation schedule | Acceptable range |
| --- | --- |
| Investigational Product Transplant Date | For anterior eye photography before transplantation, within -4 days of the transplant date |
| Week 2 after transplantation of the investigational product | Within ±3 days of the scheduled day |
| Week 4 after transplantation of the investigational product | Within ±3 days of the scheduled day |
| Week 12 after transplantation of the investigational product | Within ±14 days of the scheduled day |
| Week 24 after transplantation of the investigational product | Within ±14 days of the scheduled day |
| Week 52 after transplantation of the investigational product | Within ±28 days of the scheduled day |
| Day of completion of follow-up | The day of completion |
| Day of discontinuation | Within +7 days of the day of discontinuation |

# Statistical Analysis

## Determination of Sample Size

Planned sample size: 6 subjects

Sample size for efficacy analysis: 5 subjects

If it is determined that the sample size for efficacy analysis cannot be achieved, subjects enrolled can be added.

Significance level: 0.05 (two sided)

Power: 90%

Null hypothesis H0: π = 0.1

Alternative hypothesis H1: π≠ 0.1

[Rationale for setting]

In this study, the expected response rate was set as 80% and the clinically significant response rate was set as 10%, and the significance level was 5% on both sides, the power was 90% or more, and the number of cases that can verify the difference to the success rate with clinical significance was calculated as the number of cases to be analyzed by an accurate test of one sample ratio. Furthermore, considering the possibility of falling out case occurrence for the number of cases to be analyzed, the target registered cases was set to 6 cases.

Response rate expected with COMET01 transplantation
In estimating the expected response rate by transplantation of investigational product, the treatment results in clinical research of cultured oral mucosal epithelial cell sheet transplantation conducted so far were referred to (Table 5). These clinical studies mainly cover Stevens-Johnson syndrome and ocular cicatricial pemphigoid, which are common bilateral diseases of LSCD, and are consistent with those in this trial. Therefore, it was judged that it was appropriate to cite the therapeutic results shown in the clinical trial as the expected response rate by the investigational product transplantation.

In past clinical studies, the results of epithelial reconstruction rates have been reported to be 57 to 100%, as shown in Table 5, 20, 21, 29-31). Further, in Reference 29 to 31, amniotic membrane is used as a substrate for the culture method, and it is different from the culture method in this clinical trial in which a culture method that does not use a substrate is adopted by using a temperature-responsive culture dish. Therefore, the data from references 20 and 21 are considered to be more important for estimating the response rate. Therefore, we assumed that the expected response rate of transplantation of the investigational product in this clinical trial was 80%. Our group has conducted several clinical studies on this disease in the past20), 21), and has obtained a success rate of epithelial reconstruction that exceeds the expected response rate (80%), so we believe that this assumption is reasonable.

Table 5 List of treatment results of cultivated autologous oral mucosal epithelial cell sheet transplantation

| Reference  No. | LSCD Eye Count | | Epithelial rebuilt power | | Observation period (months) | Remarks |
| --- | --- | --- | --- | --- | --- | --- |
| SJS,OCP | Thermochemical corrosion, etc. | SJS,OCP | Thermochemical corrosion, etc. |
| 20 | 4 | 0 | 100% | － | 14 |  |
| 21 | 5 | 1 | 100% | 100% | 6 |  |
| 29 | 3 | 3 | 100% | 100% | 13.8 |  |
| 30 | 21 | 19 | 57.1% | 57.9% | 25.5 |  |
| 31 | 7 | 8 | 66.7% | ― | 20 | The rate of reconstruction by disease is unknown |

SJS: Stevens-Johnson Syndrome

OCP: Ocular cicatricial pemphigoid

Clinically significant response rate

Allogenic limbal have been transplanted as a standard treatment for LSCD, but the long-term prognosis is poor. In particular, Stevens-Johnson syndrome and ocular cicatricial pemphigoid, which cause LSCD in bilateral properties, are known to have poor treatment outcomes compared to thermochemical wounds due to prolonged chronic inflammation and tear reduction 5, 6, 32-34).

In the past reports reporting on the corneal epithelial reconstruction rate for Stevens-Johnson syndrome and ocular cicatricial pemphigoid by allogenic wheel transplantation, references 5 and 32 were obtained as a result of searching for the following conditions. The reconstruction rate of the corresponding case in Reference 5 was calculated as 1 out of 6 eyes (average observation period 60 months), and the reconstruction rate of the corresponding case of Reference 32 was calculated as 0 out of 6 eyes (average observation period 47.9 months), and the corneal epithelial reconstruction rate in these documents was estimated to be 1 out of 12 eyes (8.3%). Therefore, the clinically significant response rate was set at 10%, which is a long-term result of allogeneic limbal transplantation several years after transplantation based on limited information, and it is not a successful rate of corneal epithelial reconstruction one year after allogeneic limbal transplantation.

- It is possible to compare the effectiveness of a single corneal transplantation

LSCD is intractable, so corneal transplantation may be performed multiple times, and many reports of treatment results have also examined the results of multiple surgeries. However, in this clinical trial, the effectiveness is planned by transplanting the investigational product once. Therefore, it was considered that the report on the transplantation once was appropriate as a comparison object, and the report of the transplant case was referred to once.

- At the same time, corneal transplantation to remove stromal opacity has not been performed.

In the treatment of LSCD, in cases with opacity of the corneal stroma, the corneal epithelium may be reconstructed, and at the same time, surface corneal transplantation or whole layer corneal transplantation may be performed for the purpose of removing corneal stromal opacity. When surface and whole corneal transplantation is performed, epithelial cells including basal cells in the central cornea are transplanted simultaneously, and the epithelial reconstruction rate may be overestimated. In addition, endothelial rejection may occur when whole layer transplantation is performed, which may affect the epithelial reconstruction rate. On the other hand, in this clinical trial, surface corneal transplantation and all-layer corneal transplantation are not scheduled to be performed at the same time as sheet transplantation, and the report of the case where simultaneous corneal transplantation has not been performed was referred to in consideration of the effect of these corneal transplantation on epithelial reconstruction.

- Effects of previous corneal transplantation on the results

As an operation before the operation of allogenic limbal transplantation, whole layer corneal transplantation, surface corneal transplantation, limbal transplantation, amniotic membrane transplantation may have been performed once or multiple times, but no matter what surgery is performed, it is considered that it has returned to the state of LSCD at the time of being subject. That is, since there is no change in the pathophysiology of corneal epithelium, it is considered that there is no effect on corneal transplantation treatment results by corneal transplantation before corneal transplantation.

- The follow-up period must be at least one year.

In this clinical trial, the follow-up period is scheduled to be 1 year. There is a possibility that the epithelial reconstruction rate is overestimated when the follow-up period of 1 year or less is extracted for the other wheeled part transplantation. Therefore, the report with the follow-up period of 1 year or more was referred to as a reference.

## Definition of Analysis Sets

### Full Analysis Set (FAS)

The FAS is the population excluding the following subjects from all subjects who provided consent:

GCP violation cases

Subjects who did not receive transplantation of the investigational product

Subjects who did not receive any observation for efficacy endpoints after transplantation of the investigational product

### Per Protocol Set (PPS)

The PPS is the population excluding the following subjects from all subjects who provided consent in the FAS:

Subjects with missing data for the primary endpoint

Violation cases of the inclusion/exclusion criteria

Protocol violation cases for primary endpoints

### Efficacy Analysis Set

The efficacy analysis set is the FAS and PPS. The FAS is the primary analysis population.

### Safety Analysis Set (Safety)

The safety analysis set includes all subjects who provided consent and is defined in two groups as follows:

##### Safety analysis set during the observation period

The safety analysis set during the observation period is the population excluding the following subjects from the subjects who provided consent:

GCP violation cases

subjects who did not undergo biopsy; and

subjects who did not receive any observation for safety endpoints.

##### Safety analysis set during the treatment period

The safety analysis set during the treatment period is the population excluding the following subjects from the safety analysis set during the observation period.

GCP violation cases

subjects who did not receive transplantation of the investigational product; and

subjects who did not receive any observation for safety endpoints after transplantation of the investigational product.

## Statistical Analysis Methods

The statistical analysis personnel will prepare the statistical analysis plan, which describes the contents of this section in a more technical and detailed manner, immediately after the protocol is finalized, in accordance with the Standard Operating Procedure (SOP).

### Efficacy

The following analyses will be performed on the basis of the efficacy analysis set.

##### Primary endpoint: Success rate of corneal epithelium reconstruction (%) at Week 52 after transplantation of the investigational product

The success rate of corneal epithelium reconstruction (%) will be calculated, and binomial test will be performed.

H0: π = 0.1

H1: π ≠ 0.1

In addition, for the success rate of corneal epithelium reconstruction (%), the two-sided 95% confidence interval will be calculated.

##### Secondary endpoints

For secondary endpoints, the following analyses will be performed from an exploratory point of view:

Number of subjects by severity of LSCD at Week 52 after transplantation of the investigational product
The number and percentage of subjects by severity will be calculated.

Subjective symptoms
For each symptom, the time course of severity will be assessed.

Corrected visual acuity

Visual acuity measured with a conventional Landolt ring chart:

Decimal visual acuity will be converted to LogMAR, and the time course of change from baseline (value at screening) will be assessed.

Visual acuity measured with the ETDRS chart:

The time course of change from baseline (value at screening) will be assessed.

Evaluation of QOL
In the NEI VFQ-25, the scores on 12 subscales as follows will be calculated, and the total score using 10 subscales (“General health” and “Driving” were excluded from the 12 subscales) will be calculated.

- General health
- General vision
- Ocular pain
- Near activities
- Distance activities
- Vision-specific social functioning
- Vision-specific mental health
- Vision-specific role difficulties
- Vision-specific dependency
- Driving
- Color vision
- Peripheral vision

Summary statistics of the total score at screening, Week 52 after transplantation, and final assessment will be calculated and assessed.

Severity of corneal opacity
The time course of severity will be assessed.

Severity of corneal neovascularization
The time course of severity will be assessed.

Severity of symblepharon
The time course of severity will be assessed.

Whether additional treatment to improve visual acuity is indicated or not at Week 52 after transplantation of the investigational product or at trial discontinuation
The number and percentage of subjects by applicability of each treatment will be calculated.

Severity of LSCD in the fellow eye, subjective symptoms, corrected vision, degree of corneal opacity, degree of corneal neovascularization, degree of symblepharon

Each evaluation item of the fellow eye is compared with the investigational product transplant eye.

### Safety

##### Significant safety endpoints

For the following six items, the expression cases in the entire treatment period of the event are aggregated for each severity, and a 95% confidence interval on both sides of the expression rate (%)is calculated.

Superficial punctate keratopathy: the number of subjects and incidence (%)

Corneal epithelial defect: the number of subjects and incidence (%)

Corneal keratinization: the number of subjects and incidence (%)

Conjunctival injection: the number of subjects and incidence (%)

Infectious keratitis: the number of subjects and incidence (%)

Endophthalmitis: the number of subjects and incidence (%)

##### Adverse events and malfunctions: the number of subjects and incidence (%)

The number of subjects with adverse events by time of occurrence will be summarized, and the incidence (%) and its two-sided 95% confidence interval will be calculated. Similar analyses will be performed for malfunctions. Analyses will be also performed by causal relationship, severity, and seriousness.

Adverse events and malfunctions in the local area of the eye and those in the other areas will be analyzed separately.

##### Important malfunctions: the number of subjects and incidence (%)

The number of subjects with important malfunctions will be summarized throughout the trial period, and the incidence (%) and its two-sided 95% confidence interval will be calculated.

##### Product malfunctions

All product malfunctions that occurred will be shown in a list of subjects.

## Other

Any missing data will not be complemented.

# Ethical Considerations

## Protection of Subjects

### Confidentiality

Once informed consent is obtained from a subject, the investigator, subinvestigator, and clinical research coordinator will use the case number assigned to the subject, not the subject's name or other identifications, to respect confidentiality.

Even if a person involved in the trial, such as the monitor and auditor designated by the coordinating investigator, became aware of the subject's private information through direct access to source documents or other records, the information shall not be disclosed to any third party.

## Informed Consent

### Preparation of the Written Information and Informed Consent Form

The investigator will prepare, and revise when necessary, the written information and informed consent form used to obtain consent from patients themselves for participation in the trial. In addition, when coordinating investigator prepares an explanatory document, the investigator will draft the document and prepare explanatory documents for use at the implementing medical institution to which he/she belongs. In addition, a revision history is created at the time of revision and it is saved. The written information and informed consent form need to be prepared accurately using plain terms that are practical and easy to understand so that they are comprehensible to all patients. The document or form thus prepared, or revised, will be used after obtaining approval from the IRB of the trial site.

### Acquisition of Consent

Before implementation of the tests/observation in the observation period, the investigator or subinvestigator will provide an explanation to the subject in plain language using the written information so that they can fully understand.

participation in the trial and, after confirming the subject's understanding of the content, obtain voluntary written consent from the subject using the informed consent form.

Each of the investigator or subinvestigator who gave the explanation (and clinical research coordinator if he/she gave supplemental explanation) and the subject will affix their signature (or name and seal) and date to the informed consent form.

The investigator or subinvestigator will provide the subject with a copy of the informed consent form with their signature (or name and seal) affixed, together with the written information, properly retain the original according to the rules of the trial site, and provide access to it if requested by the monitor, auditor, etc.

In “Day of informed consent” in the CRFs, the date when the consent was obtained will be entered.

### Written Information

The written information will include explanations of the following:

That the trial involves research

The objective of the trial

The design of the trial

The reasonably expected clinical benefits and reasonably foreseeable risks or inconveniences

The expected duration of the subject's participation in the trial

The expected number of subjects involved in the trial

The alternative procedure(s) or course(s) of treatment that may be available to the subject and their important potential benefits and risks

The compensation and treatment available to the subject in the event of trial-related injury

That the subject's participation in the trial is voluntary and that the subject may refuse to participate or withdraw from the trial, at any time, without penalty or loss of benefits to which the subject is otherwise entitled

How to handle the investigational product if the subject who is participating in the trial withdraws from the participation

That the subject will be informed in a timely manner if information becomes available that may affect the subject's willingness to continue participation in the trial

The foreseeable circumstances and/or reasons under which the subject's participation in the trial may be terminated

That the monitor(s), auditor(s), IRB, and regulatory authority(ies) will be granted direct access to the source documents related to the subject's medical care, without violating the confidentiality of the subject, and that, by affixing the subject's signature or name and seal to an informed consent form, the subject is authorizing such access

That the subject's privacy will remain confidential even if the results of the trial are published

The anticipated payment, if any, to the subject

The anticipated expenses, if any, to the subject

The name, title, and contact information of the investigator and subinvestigator

The help desk of the trial site to contact for further information regarding the trial and the rights of the subjects and to which inquiries are made or where to contact in the event of trial-related injury

The subject's responsibilities

That if the subject is being treated by another doctor, the other doctor will be notified of the subject's participation in the trial

Type of the IRB reviewing/deliberating the appropriateness of the trial, matters reviewed/deliberated by each IRB, and other matters concerning the IRB involved in the trial

Matters related to the attribution of intellectual property rights and economic interests pertaining to clinical trials

Matters related to conflicts of interest (whether or not there is cooperation with companies, etc.)

That materials of animal origin (bovine serum, mouse embryo-derived cells, and pig pancreas-derived trypsin) are used for manufacturing the investigational product and, although safety measures against transmission of infections are taken, the risk of infections from these materials cannot be totally ruled out

That the investigational product will not be manufactured or dispensed if the collected oral mucosal tissue does not conform to the test requirements at receipt, is found to be contaminated during manufacture of the investigational product, or does not conform to the test requirements during the manufacturing process or specifications of the investigational product; and that, in such a case, the tissue may be collected again, the day of transplantation of the investigational product may be postponed, or a change to other therapy may be made, after discussion with the investigator or subinvestigator or coordinating investigator

That the collected blood will be retained at Osaka University for 10 years to investigate the cause of infection, if it occurs

That a part of the investigational product will be retained at J-TEC for at least the period of 10 years added to the validity period of the trial product to ensure the long-term safety and that the medical records will be retained for 20 years at the trial site where the transplantation of the investigational product is performed

That a part of the investigational product manufactured may be used to obtain quality data at J-TEC.

J-TEC will manufacture investigational product by changing the production method of cultivated autologous oral mucosal epithelial cell sheets at Osaka University.

Cytogenetic changes were observed in the cultivated autologous oral mucosal epithelial cell sheet before the change in production method, but no abnormalities were observed in clinical studies. A nuclear type test and a soft agar colony formation test are performed using a part of the collected oral mucosal tissue, but the risk of tumorigenicity due to transplanted cells is not completely excluded. The test results will be found after transplantation of the investigational product. In addition, follow-up after transplantation of the investigational product is performed, and appropriate treatment should be taken when abnormalities are observed.

### Provision of New Safety Information and Revision of the Written Information and Informed Consent Form

Providing new safety information

During the trial period, the investigator secures a way to contact the subject in an emergency and promptly informs the subject if information is obtained that may affect the subject's intention regarding the continuation of participation in the clinical trial.

Revision of explanatory and consent documents

When the investigator is aware of the quality, efficacy and safety of the test product and other information important for conducting the trial properly, the investigator shall revise the explanatory and consent documents as necessary. In addition, when coordinating investigator prepares a revised version of the explanatory document, the investigator shall draft the document and prepare a revised version of the explanatory document used by the implementing medical institution to which he/she belongs. In addition, a revision history is created at the time of revision and it is saved.

In addition to the revision by[1], the investigator shall revise the explanatory and consent documents of the implementation medical institution to which he/she belongs as necessary. In addition, a revision history is created at the time of revision and it is saved.

## Compensation to the Subject in the Event of Trial-related Injury

The coordinating investigator, the investigator responsible for the clinical trial, and the implementing medical institution shall take the following matters and other necessary measures in advance for compensation for health hazards caused to the subject in connection with the clinical trial (including those that occurred when all or part of the business pertaining to the preparation, management or implementation of the clinical trial was entrusted):

Such measures and compensation shall not prevent the subject from exercising his/her right to claim damages.

Establishment of a system for providing medical care

Coordinating investigator, investigators, and medical institutions shall establish a sufficient system to provide medical care as a treatment for defects in investigational product, etc..

Insurance coverage

Coordinating investigator, investigators, and implementing medical institutions shall enroll in the insurance after fully understanding the content of the insurance pertaining to the doctor-led clinical trial and the characteristics of the investigational product. The period covered by compensation shall be from the time after the consent of each subject is obtained to the last consultation date according to the clinical trial implementation plan, and the request for compensation from the subject shall be up to one year after the end of the clinical trial. In the event of a serious adverse event (disability class 1 and grade 2 equivalents to disability or death in the biological product infection relief system), compensation shall be paid.

.

# Direct Access to Source Documents

The head of the implementing medical institution and the investigator shall accept and cooperate with monitoring and auditing by monitoring and auditing officers appointed by the investigator and investigations by the IRB and regulatory authorities.

In addition, the head of the implementing medical institution and the investigator shall, at the request of the monitoring officer, auditor, IRB, or regulatory authority, make all clinical trial-related records, such as the original materials, available for direct viewing.

The original material refers to the records necessary for reproducing and evaluating the factual course of the clinical trial, such as medical records, consent documents, various test data, documents related to the management of investigational product and investigational product, and data from which the case report is prepared.

# Quality Control and Quality Assurance

## Quality Control

The monitoring officer shall be responsible for ensuring that the human rights, safety and welfare of the subjects are protected, that the clinical trial is conducted in compliance with the latest clinical trial plan and GCP, and that the data reported by the investigator or the trial sharing physician is accurate and complete, in order to confirm in light of the original documents and other clinical trial-related records. monitoring in accordance with the "Procedure for conducting monitoring".

## Quality Assurance

In order to ensure that clinical trial implementation and data preparation, recording and reporting are conducted appropriately in compliance with the clinical trial plan and GCP, auditors independent of the investigation department, including the department in charge of monitoring, conduct audits at the conducting medical institution and other facilities pertaining to the implementation of the clinical trial in accordance with the "Procedure for conducting audits" to ensure that quality control is carried out appropriately.

# Burden of Trial-related Expenses

The costs for the manufacture and transplantation of this investigational product and the collection of oral mucosae shall be borne by the research funds issued by the Japan Agency for Medical Research and Development by the coordinating investigator . In addition, medical expenses during the trial period are within the normal medical care range, and the cost burden of the subject according to the copayment of the health insurance to which each subject join occurs. In addition, the burden reduction cost to the subject is not paid.

# Registration of clinical trials, attribution and publication of results

## Clinical trial registration

This trial is registered in the Clinical Trial Registration System (UMIN -CTR) of the Medical Information Network Research Center of the University Hospital.

## Attribution and publication of results

Intellectual property rights arising from this clinical trial shall belong to Osaka University. Osaka University will license out to a company after the completion of the trial, and the company will use the information obtained in this trial for the purpose of applying for approval for the manufacture and sale of regenerative medicine products. In connection with the review, we may publish the contents of this trial material to a regulatory representative.

When presenting part or all of the results of this trial for academic purposes, or when posting in a specialized medical journal, etc., the coordinating investigator will decide whether it is appropriate.

When making public, the names of the subjects will not be directly disclosed, and the protection of personal information shall be given due consideration.

# References

1. Thoft RA, Friend J: The X, Y, Z hypothesis of corneal epithelial maintenance. *Invest Ophthalmol Vis Sci* **24(10)**: 1442-1443 (1983)
2. Cotsarelis G, Cheng SZ, Dong G, Sun TT, Lavker RM: Existence of slow-cycling limbal epithelial basal cells that can be preferentially stimulated to proliferate: implications on epithelial stem cells. *Cell* **57(2)**: 201-209 (1989)
3. Nishida K: Tissue engineering of the cornea. *Cornea* **22(7 Suppl)**: S28-S34 (2003)
4. Nishida K, Watanabe H: 4. Corneal epithelial transplantation. In: Corneal Clinic, 2nd ed. (Manabe R, Kinoshita S, Ohashi Y, supervising eds.). Igaku-Shoin, Tokyo, pp.261-263 (2003)
5. Ilari L, Daya SM: Long-term outcomes of keratolimbal allograft for the treatment of severe ocular surface disorders. *Ophthalmology* **109(7)**: 1278-1284 (2002)
6. Tsubota K, Satake Y, Kaido M, Shinozaki N, Shimmura S, Bissen-Miyajima H, Shimazaki J: Treatment of severe ocular-surface disorders with corneal epithelial stem-cell transplantation. *N Engl J Med* **340(22)**: 1697-1703 (1999)
7. Dua HS, Azuara-Blanco A: Autologous limbal transplantation in patients with unilateral corneal stem cell deficiency. *Br J Ophthalmol* **84(3)**: 273-278 (2000)
8. Kenyon KR, Tseng SC: Limbal autograft transplantation for ocular surface disorders. *Ophthalmology* **96(5)**: 709-722 (1989)
9. Liang L, Sheha H, Li J, Tseng SC: Limbal stem cell transplantation: new progresses and challenges. *Eye (Lond)* **23(10)**: 1946-1953. (2009)
10. Kheirkhah A, Raju VK, Tseng SC: Minimal conjunctival limbal autograft for total limbal stem cell deficiency. *Cornea* **27(6)**:730-733 (2008)
11. Chen JJ, Tseng SC: Corneal epithelial wound healing in partial limbal deficiency. *Invest Ophthalmol Vis Sci* **31(7)**: 1301-1314 (1990)
12. Dua HS, Saini JS, Azuara-Blanco A, Gupta P: Limbal stem cell deficiency: concept, aetiology, clinical presentation, diagnosis and management. *Indian J Ophthalmol* **48(2)**: 83-92 (2000)
13. Burillon C, Huot L, Justin V, Nataf S, Chapuis F, Decullier E, Damour O: Cultured autologous oral mucosal epithelial cell sheet (CAOMECS) transplantation for the treatment of corneal limbal epithelial stem cell deficiency. *Invest Ophthalmol Vis Sci* **53(3)**: 1325-1331 (2012)
14. Yamato M, Konno C, Utsumi M, Kikuchi A, Okano T: Thermally responsive polymer-grafted surfaces facilitate patterned cell seeding and co-culture. *Biomaterials.* **23**: 561-7 (2002)
15. Shimizu T, Yamato M, Isoi Y, Akutsu T, Setomaru T, Abe K, *et al*. Fabrication of pulsatile cardiac tissue grafts using a novel 3-dimensional cell sheet manipulation technique and temperature-responsive cell culture surfaces. *Circ Res*. **90**: e40 (2002)
16. Hayashida Y, Nishida K, Yamato M, Watanabe K, Maeda N, Watanabe H, *et al*. Ocular surface reconstruction using autologous rabbit oral mucosal epithelial sheets fabricated ex vivo on a temperature-responsive culture surface. *Invest Ophthalmol Vis Sci.* **46**:1632-9 (2005)
17. Hayashi R, Yamato M, Takayanagi H, Oie Y, Kubota A, Hori Y, *et al*. Validation system of tissue-engineered epithelial cell sheets for corneal regenerative medicine. *Tissue Eng Part C Methods*. **16**:553-60 (2010)
18. Hori Y, Sugiyama H, Soma T, Nishida K: Expression of membrane-associated mucins in cultivated human oral mucosal epithelial cells. *Cornea.* **26**:S65-9 (2007)
19. Sumide T, Nishida K, Yamato M, Ide T, Hayashida Y, Watanabe K, *et al*. Functional human corneal endothelial cell sheets harvested from temperature-responsive culture surfaces. *FASEB J.* **20**:392-4 (2006)
20. Nishida K, Yamato M, Hayashida Y, Watanabe K, Yamamoto K, Adachi E, *et al*. Corneal reconstruction with tissue-engineered cell sheets composed of autologous oral mucosal epithelium. *N Engl J Med*. **351**:1187-96 (2004)
21. Clinical Study on Cultivated Autologous Oral Mucosal Epithelial Sheet Transplantation for Treating Patients with Intractable Keratoconjunctival Disease *Clinical Research Report for Future Medicine*　P0402 ID: UMIN000012819
22. Bakhtiari P, Djalilian A: Update on limbal stem cell transplantation. *Middle East Afr J Ophthalmol* **17(1)**: 9-14 (2010)
23. Shimizu Y: Diabetic eye disease. Diabetic retinopathy. *J Nippon Med Sch* **51(6)**: 110-113 (1984)
24. Nakamura M: Front line of dry eye research. *Folia Pharmacologica Japonica (Nippon Yakurigaku Zasshi)* **135**: 138-141 (2010)
25. Holland EJ: Epithelial transplantation for the management of severe ocular surface disease. *Trans Am Ophthalmol Soc* **94**: 677-743 (1996)
26. Nakamura T, Takeda K, Inatomi T, Sotozono C, Kinoshita S: Long-term results of autologous cultivated oral mucosal epithelial transplantation in the scar phase of severe ocular surface disorders. *Br J Ophthalmol.* **95**:942-6 (2011)
27. Rama P, Matuska S, Paganoni G, Spinelli A, De Luca M, Pellegrini G: Limbal stem-cell therapy and long-term corneal regeneration. *N Engl J Med* **363(2)**: 147-155 (2010)
28. JCOG website URL <http://www.jcog,jp/>
29. Nakamura T, Inatomi T, Sotozono C, Amemiya T, Kanamura N, Kinoshita S: Transplantation of cultivated autologous oral mucosal epithelial cells in patients with severe ocular surface disorders. *Br J Ophthalmol.* **88**: 1280-4 (2004)
30. Satake Y, Higa K, Tsubota K, Shimazaki J: Long-term outcome of cultivated oral mucosal epithelial sheet transplantation in treatment of total limbal stem cell deficiency. *Ophthalmology* **118**: 1523-30 (2011)
31. Inatomi T, Nakamura T, Koizumi N, Sotozono C, Yokoi N, Kinoshita S: Midterm results on ocular surface reconstruction using cultivated autologous oral mucosal epithelial transplantation. *Am J Ophthalmol*. **141**: 267-75 (2006)
32. Han ES, Wee WR, Lee JH, Kim MK: Long-term outcome and prognostic factor analysis for keratolimbal allografts. *Graefes Arch Clin Exp Ophthalmol.* **249**: 1697-704 (2011)
33. Tan DT, Ficker LA, Buckley RJ: Limbal transplantation. *Ophthalmology.* **103**: 29-36 (1996)
34. Shimazaki J, Shimmura S, Fujishima H, Tsubota K: Association of preoperative tear function with surgical outcome in severe Stevens-Johnson syndrome. *Ophthalmology.* **107**: 1518-23 (2000)

# Attachments

Attachment 1 List of Trial sites/Investigators

Attachment 2 Eligibility Evaluation Form for Enrollment of Subjects
