# Supplementary material
Source: Research Square preprint supplement (doi:10.21203/rs.3.rs-7181420/v1)
Supplement: Supplementary file 6 [file 4d1b948b6db574ebaa81cfc0.docx]

Long-term follow-up of the multicenter investigator-initiated clinical trial using cultivated autologous oral mucosal epithelial cell sheet (COMET01) transplantation for patients with limbal stem-cell deficiency

Protocol

Sponsor: Japan Tissue Engineering Co., Ltd.

Protocol no.: J-TEC-COMET01-FU
Prepared: September 8, 2016, ver. 1

| Confidentiality statement  This protocol contains confidential information of Japan Tissue Engineering. Disclosure of the information is limited to persons involved in this trial for conduct of the trial only.  Disclosure of the protocol to a third party without obtaining written approval from the sponsor in advance is strictly prohibited, except for use to obtain informed consent from the subjects.  Copying of this protocol without obtaining written approval from the sponsor in advance is strictly prohibited. |
| --- |

| Ver. 1 | Prepared: September 8, 2016 |
| --- | --- |

Study organization

| Medical expert | Managing Executive Officer: Ken-ichiro Hata, D.D.S., Ph. D.  Japan Tissue Engineering Co., Ltd.  The medical expert provides the sponsor with advice from a medical point of view for the following, as necessary:   1. Preparation and revision of the protocol and investigator's brochure 2. Preparation of written information (draft) and informed consent form (draft) 3. Designation of investigators and study sites 4. Designation of coordinating investigator and members of response assessment committee 5. Evaluation and handling of safety information on the investigational device 6. Handling of unexpected issues arising during the study 7. Preparation of a clinical study report |
| --- | --- |
| Coordinating investigator | Prof. Kohji Nishida, Ph. D.  Department of Ophthalmology, Graduate School of Medicine, Osaka University  Major responsibilities of the coordinating investigator are as follows:   1. Review of the protocol, investigator's brochure, written information (draft), and informed consent form (draft) 2. Coordination between study sites regarding details of the protocol 3. Coordination of interpretation of the protocol arising during the study 4. Other advice to facilitate appropriate and smooth conduct of the study |
| Study sites/Investigators | Study sites  Investigators |
| Response assessment committee | Chairperson  Members |
| Person responsible for assignment of photography of the anterior ocular segment for response assessment | Yumiko Nemoto Consulting Business Unit, East Japan Medical Writing Department  Cmic Holdings Co., Ltd. |
| Sponsor | Sponsor  Japan Tissue Engineering Co., Ltd.  President and CEO: Aiichiro Hiruma |
| Study general manager  Shigeaki Hayashi  Chief of Clinical Development Section, Clinical Development Department  Japan Tissue Engineering Co., Ltd. |
| Department in charge of the study | Study manager  Masami Suzuki  Clinical Development Section, Clinical Development Department  Japan Tissue Engineering Co., Ltd. |
| Safety information manager  Michiyo Aiba  Manager of Regulatory Affairs Department  Japan Tissue Engineering Co., Ltd. |
| Quality control manager  Takeo Suzuki  Chief in charge, Clinical Development Section, Clinical Development Department  Japan Tissue Engineering Co., Ltd. |
| Data management manager  Yukiko Horikawa  Clinical Development Section, Clinical Development Department  Japan Tissue Engineering Co., Ltd. |
| Statistical analysis manager  Masashi Noguchi  Clinical Development Section, Clinical Development Department  Japan Tissue Engineering Co., Ltd. |
| Department in charge of audit | Audit manager  Keiko Muramoto  Chief of Regulatory Audit Section, Quality Assurance Department  Japan Tissue Engineering Co., Ltd. |
| Emergency contact | Study general manager  Shigeaki Hayashi  Chief of Clinical Development Section, Clinical Development Department  Japan Tissue Engineering Co., Ltd.  Study manager  Masami Suzuki  Clinical Development Section, Clinical Development Department  Japan Tissue Engineering Co., Ltd. |

Definition of abbreviations and terms

List of abbreviations

| Abbreviation | Description |
| --- | --- |
| GCP | Good clinical practice |
| IRB | Institutional Review Board |
| MedDRA/J | Medical Dictionary for Regulatory Activities Terminology/J |
| SOP | Standard operating procedure |
| ETDRS | Early Treatment Diabetic Retinopathy Study |

List of terms

| Term | Description |
| --- | --- |
| COMET01 | Development code of the investigational products |

Synopsis

| Objectives of the study  The purpose of this study is to evaluate long-term safety and efficacy in patients with LSCD to whom cultivated autologous oral mucosal epithelial cell sheet (COMET01) have been transplanted in the clinical study (protocol No. OUH-COMET01). |
| --- |
| Disease studied  Limbal stem cell deficiency |
| Inclusion criteria/exclusion criteria  Patients who satisfy the inclusion criteria and none of exclusion criteria listed as follows are eligible for the study:  Inclusion criteria:  1) Patients enrolled in the COMET01 Trial and transplanted with the investigational product  Exclusion criteria:  1) Patients who have a schedule to participate in another clinical study during participation in the present study  2) Women who want to be pregnant during the study period  3) Other patients who are not eligible for the study, in the opinion of the investigator/sub investigator |
| Study design  Multicenter, open-label, non-controlled study |
| Procedure and time of informed consent  Procedure  Witten informed consent is obtained from patients themselves  Time of informed consent  Before start of examination and observation at Week 52 after transplantation of the investigational product in the COMET01 Trial |
| Concomitant medication/therapy  For medication used during the study period, the name of the drug, administration route, and period and purpose of the medication should be documented in the case report form. For therapy used concomitantly during the study period, the name of the therapy, and period and purpose of the therapy should be documented in the case report form. |
| Non-proprietary name of the investigational product  autologous cultivated mucosal epithelial cell sheet (Undecided) |
| Items and time of examination and observation  Examination and observation are performed according to the schedule of examination and observation, respectively. |
| Endpoints  Efficacy  1) Severity of LSCD at Week 104 after transplantation of the investigational product  2) Severity of LSCD after transplantation of the investigational product  3) Subjective symptoms  4) Corrected visual acuity  5) QOL  6) Severity of corneal opacity  7) Severity of corneal neovascularization  8) Severity of symblepharon  9) Contribution to restoration of the corneal surface in subjects who received additional treatment  10) Severity of LSCD, subjective symptoms, corrected vision, degree of corneal opacity, degree of corneal neovascularization and degree of symblepharon in the fellow eye.  Safety  1) Adverse events and failure: the number of subjects and incidence (%)  2) Significant failure: the number of subjects and incidence (%) |
| Target sample size  Same as the number of patients enrolled in the COMET01 Trial and transplanted with the investigational product |
| Study period  From October 1, 2016 to December 31, 2018 |
| Good clinical practice (GCP) inspection  GCP inspection is applicable to this clinical study. |

Table 1 Schedule of Examination and Observation

| Time  Observation | Informed consent | Week 78 | Week 104 | Additional treatment* (before treatment) | Dis-continua-tion |
| --- | --- | --- | --- | --- | --- |
|  | Days546±28 | Days 728±56 | Day −35 | Day +35 |
| Subject's background | ⚫ |  |  | ⚫** |  |
| Evaluation of eligibility | ⚫ |  |  |  |  |
| Laboratory tests |  |  | ⚫ | ⚫ | ⚫ |
| Photos of the anterior ocular segment |  | 🞋 | 🞋 | 🞋 | 🞋 |
| Evaluation of the severity of LSCD according to LSCD classification |  | 🞋 | 🞋 | 🞋 | 🞋 |
| Subjective symptoms |  | 🞋 | 🞋 | 🞋 | 🞋 |
| Corrected visual acuity |  | 🞋 | 🞋 | 🞋 | 🞋 |
| Evaluation of QOL |  |  | ⚫ | ⚫ | ⚫ |
| Severity of corneal opacity |  | 🞋 | 🞋 | 🞋 | 🞋 |
| Severity of corneal neovascularization |  | 🞋 | 🞋 | 🞋 | 🞋 |
| Severity of symblepharon |  | 🞋 | 🞋 | 🞋 | 🞋 |
| Contribution to restoration of the corneal surface |  |  | ◼ |  | ◼ |
| Significant failure |  | ⚫ | ⚫ | ⚫ | ⚫ |
| Adverse events |  |  | ⚫ |  |  |

⚫ : Implementation

◼ : For the target eye

🞋 : For bilateral eyes

* : Only for subjects who received additional treatment

** : Performed after additional treatment

Table of Contents

[1. Background of Development and Rationale of the Protocol 4](#_Toc103601519)

[1.1 Description of Limbal Stem Cell Deficiency (LSCD) 4](#_Toc103601520)

[1.2 Existing Therapies and Their Problems 4](#_Toc103601521)

[1.3 Rationale of the Clinical Study 5](#_Toc103601522)

[1.4 Profile of the Investigational Product 5](#_Toc103601523)

[1.5 Study Design 5](#_Toc103601524)

[1.6 Clinical Studies 6](#_Toc103601525)

[1.7 Benefits and Risks 9](#_Toc103601526)

[2. Compliance with Good Clinical Practice (GCP) for Cellular and Tissue-based Products 9](#_Toc103601527)

[3. Objective of the Study 10](#_Toc103601528)

[4. Inclusion and Exclusion Criteria 10](#_Toc103601529)

[4.1 Inclusion Criteria 10](#_Toc103601530)

[4.2 Exclusion Criteria 10](#_Toc103601531)

[5. Notification to Other Physicians 10](#_Toc103601532)

[6. Study Procedure 11](#_Toc103601533)

[6.1 Enrollment of Subjects 11](#_Toc103601534)

[6.2 Evaluation/Observation Period 11](#_Toc103601535)

[6.3 Criteria and Procedure for Study Discontinuation of Individual Subject 11](#_Toc103601536)

[6.3.1 Discontinuation Criteria 11](#_Toc103601537)

[6.3.2 Procedure and Follow-up of the Subject who Discontinues the Study Prematurely 12](#_Toc103601538)

[6.4 Clinical Trial Discontinuation and Interruption Standards and Procedures at the Study Site 12](#_Toc103601539)

[6.4.1 Discontinuation Criteria 12](#_Toc103601540)

[6.4.2 Procedure for Discontinuation or Interruption 12](#_Toc103601541)

[6.5 Concomitant Drugs/Therapies 13](#_Toc103601542)

[6.5.1 Acceptable Concomitant Drugs/Therapies 13](#_Toc103601543)

[6.5.2 Prohibited Concomitant Drugs and Prohibited Concomitant Therapies 13](#_Toc103601544)

[7. Schedule and Items of Examination and Observation 13](#_Toc103601545)

[7.1 Survey Items Regarding Demographics and Other Baseline Characteristics (Subject's Background) 13](#_Toc103601546)

[7.2 Photos of Anterior Ocular Segment 13](#_Toc103601547)

[7.3 Survey Items Regarding Efficacy 13](#_Toc103601548)

[7.4 Survey Items Regarding Safety 16](#_Toc103601549)

[7.5 Schedule of Examination and Observation 17](#_Toc103601550)

[8. Evaluation of Efficacy and Safety 18](#_Toc103601551)

[8.1 Evaluation of Efficacy 18](#_Toc103601552)

[8.2 Evaluation of Safety 19](#_Toc103601553)

[8.3 Response Assessment Committee 20](#_Toc103601554)

[9. Measures for Adverse Events and Malfunctions 20](#_Toc103601555)

[9.1 Definition of Adverse Event and Malfunction 20](#_Toc103601556)

[9.1.1 Adverse Event 20](#_Toc103601557)

[9.1.2 Malfunction 20](#_Toc103601558)

[9.1.3 Serious Adverse Events 21](#_Toc103601559)

[9.2 Criteria for Severity Assessment of Adverse Events 21](#_Toc103601560)

[9.3 Criteria for Causality Assessment 21](#_Toc103601561)

[9.4 Assessment/Follow-up of Adverse Events 22](#_Toc103601562)

[9.5 Measures for Serious Adverse Events or Important Malfunctions 22](#_Toc103601563)

[9.6 Adverse Events Expressed in Previous Clinical Studies 22](#_Toc103601564)

[10. Agreement on, Deviations from, and Changes and Amendments of the Protocol 26](#_Toc103601565)

[10.1 Agreement on the Protocol 26](#_Toc103601566)

[10.2 Deviations from the Protocol 26](#_Toc103601567)

[10.3 Deviations from, or Changes of, the Protocol to Eliminate Immediate Hazards to Subjects or for Other Unavoidable Medical Reasons 26](#_Toc103601568)

[10.4 Protocol Amendment 27](#_Toc103601569)

[11. Premature Termination or Suspension of the Entire Trial 27](#_Toc103601570)

[11.1 Discontinuation or Suspension Criteria 27](#_Toc103601571)

[11.2 Discontinuation or Suspension Procedures 27](#_Toc103601572)

[12. Completion of the Trial 27](#_Toc103601573)

[13. Trial Period 27](#_Toc103601574)

[14. Data Handling and Record Keeping 28](#_Toc103601575)

[14.1 Case Report Form 28](#_Toc103601576)

[14.1.1 Preparation of Case Report Forms 28](#_Toc103601577)

[14.1.2 Correction of Case Report Forms 28](#_Toc103601578)

[14.1.3 Specification of Entries in the Case Report Forms to Be Regarded as Source Document 28](#_Toc103601579)

[14.2 Record Keeping 28](#_Toc103601580)

[14.3 Acceptable Range of Test/Observation Schedule 29](#_Toc103601581)

[15. Statistical Analysis 30](#_Toc103601582)

[15.1 Determination of Sample Size 30](#_Toc103601583)

[15.2 Definition of Analysis Sets 30](#_Toc103601584)

[15.2.1 Efficacy Analysis Set 30](#_Toc103601585)

[15.2.2 Safety Analysis Set (Safety) 30](#_Toc103601586)

[15.3 The case which obtained the consent of this clinical trial participation is made to be the safety analysis target group. Statistical Analysis Methods 30](#_Toc103601587)

[15.3.1 Efficacy 30](#_Toc103601588)

[15.3.2 Safety 31](#_Toc103601589)

[15.4 Pooled Analysis 32](#_Toc103601590)

[15.5 Other 32](#_Toc103601591)

[16. Ethical Considerations 32](#_Toc103601592)

[16.1 Protection of Subjects 32](#_Toc103601593)

[16.1.1 Confidentiality 32](#_Toc103601594)

[16.2 Informed Consent 32](#_Toc103601595)

[16.2.1 Preparation of the Written Information and Informed Consent Form 32](#_Toc103601596)

[16.2.2 Acquisition of Consent 33](#_Toc103601597)

[16.2.3 Written Information 33](#_Toc103601598)

[16.2.4 Provision of New Safety Information and Revision of the Written Information and Informed Consent Form 34](#_Toc103601599)

[16.3 Compensation to the Subject in the Event of Trial-related Injury 35](#_Toc103601600)

[17. Monitoring and Audit 35](#_Toc103601601)

[17.1 Direct Access to Source Documents, etc. 35](#_Toc103601602)

[17.2 Monitoring 36](#_Toc103601603)

[18. Quality Control and Quality Assurance 36](#_Toc103601604)

[18.1 Quality Control 36](#_Toc103601605)

[18.2 Quality Assurance 36](#_Toc103601606)

[19. Burden of Trial-related Expenses 36](#_Toc103601607)

[20. Publication Policy 36](#_Toc103601608)

[21. References 38](#_Toc103601609)

# Background of Development and Rationale of the Protocol

## Description of Limbal Stem Cell Deficiency (LSCD)

The cornea consists of three main layers, epithelium, stroma, and endothelium, from the surface of the eyeball. It is understood that the integrity of the cornea is maintained by continuous and balanced turnover of the epithelium, a cycle of proliferation (X), migration (Y), and sloughing (Z) expressed as X + Y = Z1). The corneal stem cell is thought to be located in the limbus, which is the narrow transitional zone of the ocular surface located between the cornea and bulbar conjunctiva2), as a source of corneal epithelial cells. LSCD is a condition in which limbal stem cells disappear and is characterized by invasion of vascularized conjunctival epithelium to the corneal surface, inducing opacity and reduction in visual acuity. Causes of LSCD include aniridia, scleralized cornea as congenital anomalies, alkali corrosion or burn as exogenous causes, and Stevens–Johnson syndrome and ocular pemphigoid as endogenous causes, but in some cases, the cause is unknown3).

## Existing Therapies and Their Problems

Existing treatments for LSCD that aim at restoring the corneal surface include allogeneic limbal transplantation and autologous limbal transplantation4-11). Another option is medication including antibiotics that alleviate symptoms and prevent LSCD from worsening. Existing treatments are described as follows.

- - - - 1. <Allogeneic limbal transplantation>

In this therapy, the conjunctiva scar is completely removed from the injured eye, and a corneal limbus graft collected from a cornea donor is transplanted. The corneal limbus covers the cornea of the injured eye and protects the cornea from invasion of conjunctival tissue or invasive cells. However, this therapy has two major problems. The first problem is rejection. It is known that limbal transplantation shows high rejection rate when used in patients with LSCD, a disease of the corneal surface. Prognosis is poor even if an immunosuppressant is administered. Another problem is shortage in donors. The Japan Eye Bank Association said that 1,967 patients are waiting for transplantation as of 2015, but only 857 persons donate their eyes a year, indicating serious shortage in donors.

- - - - 1. <Autologous limbal transplantation>

In this therapy, two biopsy samples of the corneal limbus are collected from the uninjured eye of the patient himself/herself and transplanted to the injured eye. This treatment can circumvent a problem of rejection, but a graft in a size of approximately 1/6 to 2/3 of the limbus is necessary to be taken from the healthy eye, which brings about serious damage to the uninjured eye. Adverse events including local corneal opacity, pseudopterygium, filamentary keratitis, and epithelium hypoplasia have been reported. Besides, the possibility of occurrence of LSCD in the uninjured eye cannot be ruled out. As a result, autologous limbal transplantation is rarely used these days. In addition, autologous limbal transplantation is not possible for bilateral LSCD.

## Rationale of the Clinical Study

In LSCD, the loss of corneal epithelium stem cells leads to re-epithelialization by the vascularized conjunctival epithelium (conjunctivalization), which causes subjective symptoms such as eye pain, feeling of foreign body, teary eyes, photophobia, dry eye sensation or discomfort, and visual impairment caused by corneal opacity12, 13).

Treatment of LSCD requires removal of the conjunctival tissue present on the cornea and restoration of the corneal surface by transplantation of corneal epithelial stem cells. Currently available treatments include allogeneic limbal transplantation and autologous limbal transplantation. However, long-term therapeutic effect cannot be expected for allogeneic limbal transplantation because of rejection, and invasiveness and damage to healthy eyes are inherent problems of autologous limbal transplantation. Also, it cannot be applied with binocular disorders. In summary, no safe and effective treatment is available for LSCD.

In treatment using COMET01, since its own cells are used, immunosuppression necessary for allogeneic limbal transplantation is unnecessary. Furthermore, using sheet engineering technology 14, 15) using a temperature-responsive culture dish, development of cultured oral mucosal epithelial cell sheet transplantation that maintains intercellular adhesion has been carried out so far 16-19). In allogeneic limbal transplantation and autologous limbal transplantation, the epithelial defect on the cornea immediately after surgery is missing. However, in the case of transplantation of the investigational product, the epithelium can be coated with the oral mucosal epithelial cell sheet immediately after surgery, and a better therapeutic effect can be expected.

Currently, a clinical study to evaluate the efficacy and safety of the investigational product, “A multicenter joint physician-led clinical trial of autologous cultivated oral mucosal epithelial cell sheet COMET01 in patients with limbal stem cell deficiency” (Protocol no.: OUH-COMET01; hereinafter referred to as the “-COMET01 Trial”), is ongoing. However, in order to confirm sustained therapeutic effect, longer-term observation is considered necessary. Therefore, we have decided to conduct the present study in patients who were enrolled in the COMET01 Trial and transplanted with the investigational product.

## Profile of the Investigational Product

The investigational product has the following characteristics:

The investigational product is an “autologous cultivated oral mucosal epithelial cell sheet” prepared from the tissue of the oral mucosa of the patient himself/herself.

3T3-J2 cells derived from mice fetus are used as feeder cells.

A temperature-responsive culture dish is used as a container for cultivation.

It is a sheet with virtual diameter of 22 mm.

## Study Design

Multicenter, open-label, non-controlled study

## Clinical Studies

1.6.1 Clinical Research

The outline of the three clinical studies conducted so far is shown below.

1) Corneal regeneration by autologous cultivated oral mucosal epithelial cell sheet transplantation (January, 2003- 2004) 20)

With the approval of the Medical Ethics Committee of the Osaka University School of Medicine, self-epithelial cells isolated and prepared from the oral mucosa were produced in four patients with completely deficient corneal epithelial stem cells due to intractable corneal epithelial disease in bilateral eyes, and cultured epithelial cell sheets were prepared in a tissue engineering manner on a temperature-responsive culture dish with NIH/ 3T3 feeder cells. After surgically removing conjunctival scar tissue from the patient's corneal surface, cell sheets were recovered from the culture dish only with low temperature treatment and transplanted without suture to the exposed corneal parenchyma.

Before transplantation, iris and pupil details were completely invisible in all four eyes, but within a week after transplantation, the corneal surface was completely reconstructed by epithelial tissue. Corneal transparency was improved in all four eyes, and postoperative visual acuity was significantly improved. During the average 14-month follow-up period, all corneal surfaces were transparent and showed no complications.

2) Clinical study of autologous cultivated oral mucosal epithelial sheet transplantation for intractable corneal disease (July, 2005- 2007)21)

With the approval of the Clinical Research Committee for Future Medicine at Osaka University Hospital (P0402), the oral mucosa of patients (6 cases) whose corneal epithelial stem cells were completely deficient due to intractable corneal epithelial disease in bilateral eyes was collected, and self-epithelial cells isolated from the mucous membrane were used as self-serum to produce cultured epithelial cell sheets on temperature-responsive culture dishes using feeder cells as self-adipose tissue-derived cells. After surgically removing conjunctival scar tissue from the patient's corneal surface, cell sheets were recovered from the culture dish only by low temperature treatment and transplanted into exposed corneal parenchyma.

[Safety Results]

As surgical adverse events such as fat collection, oral mucosa collection, culture sheet transplantation, etc., the frequency of pain and discomfort at the surgical site was high (13 cases in total), but it was a pain of the degree caused by surgical procedures, and it recovered quickly. In addition, as adverse events related to surgery, increased blood pressure during surgery (3 cases), blood pressure decrease (1 case), decrease in SpO2 (4 cases), etc. were recognized, but all were minor and recovered quickly. After sheet transplantation, "eye pain and foreign body sensation" were high in frequency with 5 cases, but both were about the same as those generated after transplantation of general corneal transplantation and amniotic membrane transplantation. Corneal epithelial defects were observed in 3 cases, all of which were partial and temporary, and epithelial defects were cured in all cases. As described above, any adverse events thought to be caused by transplantation of self-cultured oral mucosal epithelial sheets were minor, and no serious adverse events were observed.

[Efficacy results]

Epithelialization of the transplanted cultured epithelial sheet was improved in all cases after 6 months, although the temporary condition was deteriorated in two cases. The condition of epithelialization at 6 months after transplantation was significantly improved compared with before transplantation (p=0.031). LogMAR visual acuity was significantly improved from 1 month after transplantation in 4 out of 6 cases, and the remaining 2 cases also improved at 6 months after transplantation compared with preoperative. LogMaR visual acuity was evaluated by a mixed effect model, and there was a significant difference between before and after cultured epithelial sheet transplantation (p<0.001). In addition, a multiple comparison of Bonfferoni showed significant improvement in LogMAR vision (0.01 or less) compared to pre-transplantation at all evaluation points (1 month, 3 months, 6 months) after transplantation. As a result of examining the relationship between the degree of improvement of LogMAR and the background factor, the tendency to obtain the visual acuity improvement was recognized as the age was lower (ρ= 0.529). As described above, this treatment method was an effective treatment method that can improve the state of epithelialization and improve vision accordingly for intractable corneal epithelial disease that has not been effective treatment so far.

3) Clinical study of autologous cultivated oral mucosal epithelial cell sheet transplantation for LSCD (multicenter clinical study) (from February 2011 to (interim data from December 2014)

We are conducting multicenter clinical research on autologous cultivated oral mucosal epithelial cell sheet transplantation at four facilities: Osaka University Hospital, Tohoku University Hospital, University of Tokyo Hospital, and Ehime University Hospital. To date, a total of 22 transplants have been performed, including 8, 6, 4 and 4 cases, respectively. Of these, 15 of them have completed the evaluation of corneal epithelialization one year after surgery, which is the main evaluation item of this study, and improvement has been recognized in all cases. In addition, 5 of these cases ended up to follow-up for 2 years. The progress of the course except for one case in which the follow-up period was extremely short as of December, 2014 is described below. This content is the content of the clinical research being carried out, and is, in principle, the result at the time of the final follow-up at the time of analysis.

1. Primary endpoint (Area without conjunctival and no epithelial defect)

Corneal epithelial reconstruction by cultured oral mucosal epithelial cell sheets was evaluated using Grating in Table 1. Before surgery, grating 0 was covered with all conjunctival epithelium on the cornea, whereas subjects who recognized improvement of Grating 2 or higher one year after surgery were determined to be effective.

The results of 15 cases that completed follow-up for one year after surgery showed improvement of Grading 2 or higher in all cases, with Grading 2 in 1 case, Grading 4 in 1 case, grading 5 in 13 cases. Therefore, it was judged that this therapy was effective in all subjects of 15 cases.

Table 1 Evaluation of conjunctivalization and epithelial defects

| There is no conjunctival,  Area without epithelial defects（x） | Grading | Decision |
| --- | --- | --- |
| 75%≦ x ≦100% | 5 | Excellent |
| 50%≦ x ＜75% | 4 | Very good |
| 25%≦ x ＜50% | 3 | Good |
| 10%≦ x ＜25% | 2 | Fair |
| 0%＜ x ＜10% | 1 | Poor |
| 0% | 0 | Bad |

1. Secondary endpoints
2. Correct vision

Corrected visual acuity is evaluated by decimal vision, LogMAR conversion is performed, and the degree of visual acuity change after surgery is evaluated using this value. It was common to evaluate visual acuity change as improvement, invariant, deterioration with change of 2 or more in LogMAR conversion, and the visual acuity change was evaluated in 21 cases. As for the evaluation, it was the final point of follow-up. Visual acuity improvement was obtained in 48% of the cases, with 10 cases of visual acuity improvement, 8 invariant and 3 cases of deterioration.

1. Corneal opacification

Corneal opacity is evaluated in the following four grades, and it is determined that it is effective when one or more improvements are recognized before and after surgery.

Grade 0 : The iris looks in detail

Grade 1 : The iris can be observed in detail but partially accompanied by turbidity

Grade 2 : The iris is not detailed and the pupil edge is slightly visible.

Grade 3 : Iris and pupil details are completely invisible

As an evaluation at the end of follow-up, improvement was 12 eyes and invariant were 9 eyes. Improvement was observed in 57% of cases.

1. Corneal neovascularization

Corneal neovascularization is evaluated in the following four grades and determined to be effective when one or more improvements are recognized before and after surgery.

Grade 0 : No angiogenesis

Grade 1 : Angiogenesis around the cornea

Grade 2 : Angiogenesis up to the pupil margin

Grade 3 : Angiogenesis beyond the pupil margin

As an evaluation at the end of follow-up, improvement was 14 eyes, invariant was 6 eyes, and deterioration was 1 eye. Improvement was observed in 67% of cases.

1. Adverse events

The types and number of adverse events generated in multicenter clinical research are shown in “9.6 Adverse Events Expressed in Previous Clinical Studies 3)”. There were no suspected associations with sheet transplantation and no clinical problems.

1.6.2 Prior Clinical Trials

Clinical trials with investigational products are only prior COMET01 trial. Since the COMET01 trial is currently in progress, there are no clinical trial results that can be described.

## Benefits and Risks

The possibility of unexpected adverse events listed in " 9.6 Adverse Events Expressed in Previous Clinical Studies" may occur, and in that case, treatment by going to the hospital, hospitalization, etc. may be required. It is also completely ruled out that unforeseen adverse events may leave the disability and the possibility of death. However, since there is no safe, effective, and long-lasting treatment for LSCD, if the effect of the investigational product is recognized, corneal epithelial reconstruction can be obtained as well as other treatments, and QOL limited by the disease will be greatly improved.

In this clinical trial, it is considered that the number of test items increases compared with ordinary visits. On the other hand, by continuing to carry out prescribed tests and observations in the preceding COMET01 trial, detailed information on the health status of the subject can be collected.

# Compliance with Good Clinical Practice (GCP) for Cellular and Tissue-based Products

The investigators and all study staff conduct the study in compliance with ethical principles originating from the Declaration of Helsinki, GCP, and applicable laws and regulations.

This study is started after obtaining approval from the Institutional Review Board (IRB) of each study site for the conduct of the study and after reviewing the protocol, explanation documents, and informed consent form.

During the study period, the status of the study is reported to the IRB once a year or as requested by the IRB, which in turn reviews the condition of the study to evaluate the appropriateness of continued conduct of the study.

# Objective of the Study

The objective of the proposed study is to evaluate the long-term efficacy and safety of the investigational product in patients with LSCD enrolled in the COMET01 Trial and transplanted with the investigational product.

# Inclusion and Exclusion Criteria

Patients who satisfy all the inclusion criteria and none of exclusion criteria respectively listed as follows are eligible for the study:

## Inclusion Criteria

Patients enrolled in the COMET01 Trial and transplanted with the investigational product

- - - - 1. [Rationale for setting]

It is an essential requisite for the achievement of the objective of this study.

## Exclusion Criteria

Patients who have a schedule to participate in another clinical study during participation in the present study

Women who want to be pregnant during the study period

Other patients who are not eligible for the study, in the opinion of the investigator/sub investigator

- - - - 1. [Rationale for setting]

Repeated participation in clinical studies is ethically not acceptable, and such participation may interfere with proper evaluation of efficacy and safety of the study treatment.

General consideration for a clinical study .

General consideration for a clinical study.

# Notification to Other Physicians

Before the start of the study, the investigator/sub investigator should confirm whether the patient receives treatment from other physicians or not. If the patient receives any treatment, the investigator/sub investigator should notify the physicians that the patient is going to participate in the proposed study, after obtaining consent from the patient.

# Study Procedure

## Enrollment of Subjects

Enrollment of the subjects is completed as follows.

The investigator/sub investigator obtains written informed consent to participation in the clinical study from a candidate patient, evaluates eligibility, fills in an eligibility evaluation form (Appendix 5), and sends it to the monitoring section of the sponsor. The time of informed consent is before start of examination and observation at Week 52 in the COMET01 Trial, and the serial registration number assigned at the registration in the COMET01 Trial is used. Even when informed consent is not obtained, an eligibility evaluation form is filled and sent to the monitoring section of the sponsor.

Monitoring section
Japan Tissue Engineering Co., Ltd.

The monitoring section of the sponsor verifies eligibility of the subject, based on the eligibility evaluation form received. Then contact the investigator or the sub investigator with the results. The investigator/sub investigator stores the eligibility evaluation form, together with the medical record.

## Evaluation/Observation Period

The long-term efficacy and safety of the study treatment are observed for 52 weeks from the completion day of the examination and observation at Week 52 in the COMET01 Trial (for 104 weeks from transplantation of the investigational product).

- - - - 1. [Rationale for setting]

The evaluation/observation period was set based on the following considerations.

According to the report on the long-term results of cultured oral mucosal epithelial transplantation, conjunctivalization, corneal opacity, and corneal neovascularization have been stable for one year after surgery, and there are few changes 22).

According to the clinical research report with cultivated autologous corneal epithelium conducted in Italy,23) which is a similar product, the efficacy rate is not expected to drop significantly after the first year of transplantation.

In general, the condition of the corneal surface sufficiently stabilizes 1 year after restoration. Thus, observation for 104 weeks after transplantation of the investigational product is enough to evaluate the long-term efficacy and safety.

## Criteria and Procedure for Study Discontinuation of Individual Subject

### Discontinuation Criteria

In the event of any of the following items, the investigator/sub investigator should discontinue the study of the relevant subject and accordingly notify the sponsor.

When the subject wants to discontinue the study or withdraw consent

When the subject experiences unacceptable adverse event

When ineligibility of the subject is revealed after the start of the study

When the subject is lost during follow-up because he/she does not visit the study site, etc.

Other cases where the investigator/sub investigator considers it necessary to discontinue the study

- - - - 1. Select main reason for discontinuation from the following five items:

Withdrawal of the consent

Adverse event

Ineligibility of the subject

Lost to follow-up

Others

### Procedure and Follow-up of the Subject who Discontinues the Study Prematurely

Appropriate action should be taken for the subject according to reason for discontinuation, and mandatory examination/observation at the end of the study should be completed within 35 days after discontinuation as far as practicable to evaluate the condition of the subject at the time of discontinuation, and the result is documented in the case report form.

Follow-up of the subject is continued after discontinuation of the study, regardless of the reason for discontinuation, and the results are entered in the case report form. If a subject discontinued the study for reason of an adverse event, he/she should be followed up until his/her condition/laboratory values improve or stabilize as far as practicable. If a subject does not come to the study site during the study, the reason and clinical course is followed up using an appropriate method (e.g., phone calling), and the results are documented in the medical record and case report form.

## Clinical Trial Discontinuation and Interruption Standards and Procedures at the Study Site

### Discontinuation Criteria

When critical or repeated deviation or violation of the protocol/study contract is detected and not corrected

When it takes time to designate a new investigator at the site, because of transfer of the original investigator

Occurrence of an ethically or clinically uncontrollable issue that requires discontinuation of the study to ensure safety of the subject

### Procedure for Discontinuation or Interruption

When the investigator discontinues or interrupts the study, he/she notifies and explains accordingly to the head of the study site in writing.

When the head of the study site receives a notification of discontinuation/interruption of the study from the investigator, he/she notifies and explains accordingly to the sponsor and IRB in writing.

When the IRB decides discontinuation/interruption of the study, the head of the study site notifies and explains immediately his/her instruction/decision based on the decision of the IRB in writing and sends a copy of the dated document describing the decision of the IRB to the investigator and sponsor.

When the study was discontinued/interrupted, the investigator accordingly notifies the subjects without delay, provides appropriate treatment, and completes the necessary procedures.

## Concomitant Drugs/Therapies

### Acceptable Concomitant Drugs/Therapies

For the drugs concomitantly used during the study period, the name, administration route, and period and purpose of use are documented in the case report form. For the therapies concomitantly used during the study period, the name and period and purpose of use are documented in the case report form.

### Prohibited Concomitant Drugs and Prohibited Concomitant Therapies

There are no prohibited concomitant drugs or therapies in this study.

# Schedule and Items of Examination and Observation

## Survey Items Regarding Demographics and Other Baseline Characteristics (Subject's Background)

Information on the following items is collected after obtaining the informed consent:

Date when informed consent was obtained from the subject

Date of birth

Sex

The following items will be investigated when additional measures are implemented.

Information on additional treatments (corneal transplantation, curettage of conjunctival epithelium, and cataract surgery) (bilateral eyes)

## Photos of Anterior Ocular Segment

Target of photos: bilateral eyes

Time of taking photos: Week 78, Week 104, the day of additional treatment (before treatment), and at discontinuation

## Survey Items Regarding Efficacy

#### Severity of LSCD according to LSCD classification

Target of evaluation: bilateral eyes

Time of evaluation: Week 78, Week 104, the day of additional treatment (before treatment), and at discontinuation

Evaluation method: Severity is evaluated according to LSCD classification

| 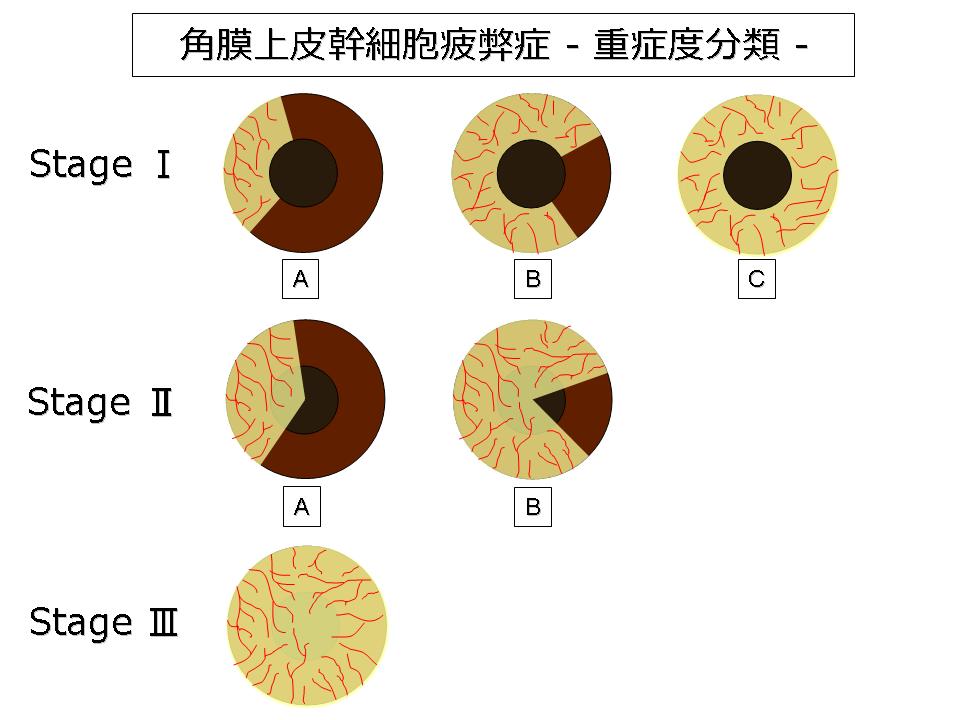 Stages of LSCD | Stage I: No conjunctivalization is present in the center of the cornea (diameter 5 mm), and the percentage of conjunctivalization in the corneal limbus is as follows: A: <50% B: ≥50% and <100% C: 100%  Stage II: Conjunctivalization is present in the center of the cornea (diameter 5 mm), and the percentage of conjunctivalization in the corneal limbus is as follows: A: <50% B: ≥50% and <100%  Stage III: The whole corneal surface is covered by conjunctival tissue. |
| --- | --- |

#### Subjective symptoms

Target of evaluation: bilateral eyes

Time of evaluation: Week 78, Week 104, the day of additional treatment (before treatment), and at discontinuation

Evaluation items: eye pain, foreign body sensation, teary eyes, photophobia, dry eye sensation, and discomfort in the eye

Evaluation method: Severity is evaluated according to the following criteria:

Criteria of severity:

0: No symptom

1: Mild symptom

2: Moderate symptom

3: Severe symptom

4: Markedly severe symptom

#### Corrected visual acuity

Target of evaluation: bilateral eyes

Time of evaluation: Week 78, Week 104, the day of additional treatment (before treatment), and at discontinuation

Evaluation method: The corrected visual acuity is measured using the standard Landolt ring visual acuity chart specified in JIS T 7309 and Early Treatment Diabetic Retinopathy Study (ETDRS) visual acuity chart

#### QOL

Time of evaluation: Week 104, the day of additional treatment (before treatment), and at discontinuation

Evaluation method: The subject answers to the NEI VFQ-25 Japanese version (v 1.4) questionnaire.

#### Severity of corneal opacity

Target of evaluation: target eye

Time of evaluation: Week 78, Week 104, the day of additional treatment (before treatment), and at discontinuation

Evaluation method: Severity is evaluated according to the following criteria:

Criteria of severity:

Grade 0: The iris can be clearly observed.

Grade 1: The iris can be clearly observed but has partial opacity.

Grade 2: The iris can be clearly observed, and the rim of the pupil is scarcely observed.

Grade 3: Neither the iris nor rim of the pupil can be observed.

#### Severity of corneal neovascularization

Target of evaluation: bilateral eyes

Time of evaluation: Week 78, Week 104, the day of additional treatment (before treatment), and at discontinuation

Evaluation method: Severity is evaluated according to the following criteria.

Criteria of severity:

Grade 0: No neovascularization

Grade 1: Neovascularization around the cornea

Grade 2: Neovascularization to the rim of the pupil

Grade 3: Neovascularization exceeding the rim of the pupil

#### Severity of symblepharon

Target of evaluation: bilateral eyes

Time of evaluation: Week 78, Week 104, the day of additional treatment (before treatment), and at discontinuation

Evaluation method: Severity is evaluated according to the following criteria:

Criteria of severity:

Grade 0: No symblepharon

Grade 1: Symblepharon limited to the surface of the conjunctiva

Grade 2: Symblepharon <1/2 of the surface of the cornea

Grade 3: Symblepharon ≥1/2 of the surface of the cornea

#### Contribution to restoration of the corneal surface in subjects who received additional treatment

Target of evaluation: target eye

Time of evaluation: Week 104 and at discontinuation

Evaluation method: For the subjects who received additional treatment, the presence or absence of contribution of the investigational product to the therapeutic results of the treatment is evaluated. For the subjects who did not receive additional treatment, the reason why no additional treatment was performed is recorded.

## Survey Items Regarding Safety

#### Adverse events

Information on new adverse events that occur after completion of the examination and observation at Week 52 in the COMET01 Trial is collected. Among the adverse events, those of which causal relationship with the investigational product cannot be ruled out are considered as failure.

#### Significant failure

Risks specific to the following cellular/tissue-based products are surveyed:

Tumor lesion of which causal relationship with the investigational product cannot be ruled out at the transplantation site

Allergic reaction of which causal relationship with the investigational product cannot be ruled out

Cryptogenic and unknown infection of which causal relationship with the investigational product cannot be ruled out

In the event of any one of the abnormalities, the investigator/sub investigator reports accordingly to the head of the study site and the sponsor, in a similar manner as that of a report of a serious adverse event.

#### Laboratory tests (hematology, biochemistry, and immunoserology)

Time of examination: Week 104, the day of additional treatment (before treatment), and at discontinuation

Evaluation method: The following test items are measured at the study site.

Hematology

Parameters: RBC count; WBC count; differential white blood cell count (neutrophils, eosinophils, basophils, and lymphocytes); and hemoglobin, hematocrit, and platelet counts

Biochemistry

Parameters: AST (GOT), ALT (GPT), serum total protein, and serum creatinine

Immunoserology

Parameter: C-reactive protein

## Schedule of Examination and Observation

Examination and observation are completed according to the following schedule, and the results are documented in the case report form.

| Time  Observation | Informed consent | Week 78 | Week 104 | Additional treatment* (before treatment) | Dis-continua-tion |
| --- | --- | --- | --- | --- | --- |
|  | Days 546±28 | Days 728±56 | Day −35 | Day +35 |
| Subject’s background | ⚫ |  |  | ⚫** |  |
| Evaluation of eligibility | ⚫ |  |  |  |  |
| Laboratory tests |  |  | ⚫ | ⚫ | ⚫ |
| Photos of anterior ocular segment |  | 🞋 | 🞋 | 🞋 | 🞋 |
| Evaluation of the severity of LSCD according to LSCD classification |  | 🞋 | 🞋 | 🞋 | 🞋 |
| Subjective symptoms |  | 🞋 | 🞋 | 🞋 | 🞋 |
| Corrected visual acuity |  | 🞋 | 🞋 | 🞋 | 🞋 |
| Evaluation of QOL |  |  | ⚫ | ⚫ | ⚫ |
| Severity of corneal opacity |  | 🞋 | 🞋 | 🞋 | 🞋 |
| Severity of corneal neovascularization |  | 🞋 | 🞋 | 🞋 | 🞋 |
| Severity of symblepharon |  | 🞋 | 🞋 | 🞋 | 🞋 |
| Contribution to restoration of the corneal surface |  |  | ◼ |  | ◼ |
| Significant failure |  | ⚫ | ⚫ | ⚫ | ⚫ |
| Adverse events |  |  | ⚫ |  |  |

⚫ : Implementation

◼ : For the target eye

🞋 : For bilateral eyes

* : Only for subjects who received additional treatment

** : Performed after additional treatment

# Evaluation of Efficacy and Safety

## Evaluation of Efficacy

- - - - 1. Severity of LSCD at Week 104 after transplantation of the investigational product

The condition of the target eye at Week 104 is evaluated according to LSCD classification, and eyes evaluated as Stage IA to C are successful. The success rate (%) of restoration of the corneal surface is calculated.

Severity of LSCD after transplantation of the investigational product

Subjective symptoms

Corrected visual acuity

QOL

Severity of corneal opacity

Severity of corneal neovascularization

Severity of symblepharon

Contribution to restoration of the corneal surface in subjects who received additional treatment

Severity of LSCD in the fellow eye, subjective symptoms, corrected vision, degree of corneal opacity, degree of corneal neovascularization, degree of symblepharon

- - - - 1. [Rationale for setting]

Sustained therapeutic effect of the investigational product is evaluated using the same index for efficacy evaluation (LSCD classification) as that in the COMET01 Trial. The long-term efficacy is evaluated at Week 104 because, according to the clinical research report with cultivated autologous corneal epithelium conducted in Italy,23) the efficacy rate is not expected to drop significantly after the first year of transplantation and because the condition of the corneal surface is considered to sufficiently stabilize 1 year after restoration (2 years after transplantation of the investigational product).

The time course of change of severity after transplantation of the investigational product is investigated to understand the long-term behavior of the corneal surface.

For the severity of eye pain, foreign body sensation, teary eyes, photophobia, dry-eye sensation, and discomfort in the eye, which are major concurrent conditions of LSCD, the change over time after transplantation of the investigational product is investigated to evaluate the long-term efficacy of the product.

Sustained improvement of visual acuity obtained by restoration of corneal surface is evaluated. The effect of additional treatment implemented after Week 52 on visual acuity is also evaluated.

The effects of the condition of the corneal surface, subjective symptoms, and visual acuity on QOL at Week 104 are investigated to evaluate the efficacy of the investigational product.

The long-term effect of corneal opacity not improved by implantation of the investigational product alone on visual acuity and/or QOL is investigated. The relationship of improvement of corneal opacity by implementation of additional treatment with visual acuity and QOL is also investigated to find out the positioning of the investigational product in the treatment of patients with LSCD.

The long-term effect on neovascularization of the corneal surface restored by transplantation of the investigational product is evaluated.

The long-term effect on the eyelid of the corneal surface restored by transplantation of the investigational product is evaluated.

If visual acuity cannot be improved by the therapy using the investigational product alone, additional treatment for improvement of visual acuity is expected to be implemented. The clinical outcome of an additional treatment is greatly affected by the condition of the corneal surface before the treatment. Thus, the contribution of the investigational product to the clinical outcome of the additional treatment is investigated to evaluate the clinical significance of the product in the treatment of patients with LSCD.

It was set to evaluate the expected clinical course when the investigational product was not applied.

## Evaluation of Safety

Adverse events and failure: the number of subjects and incidence (%)

Significant failure: the number of subjects and incidence (%)

- - - - 1. [Rationale for setting]

In general, information on adverse events is collected for evaluation of safety of study treatment.

The investigational product is a cellular/tissue-based product manufactured from the oral mucosal tissue collected from the subject himself/herself and used for local treatment of the cornea. It has no pharmacological effect on the whole body or other organs. Therefore, the following risks specific for this type of products are investigated for evaluation of safety, because toxicity relating to metabolism or excretion is not relevant:

Tumor lesion of which causal relationship with the investigational product cannot be ruled out at the transplantation site

Allergic reaction of which causal relationship with the investigational product cannot be ruled out

Cryptogenic and unknown infection of which causal relationship with the investigational product cannot be ruled out

Item [1] was defined to monitor the tumor lesion that may originate from cells contained in the investigational product throughout the study period.

For item [2], although subjects with a history of allergic reaction to animals or antibiotics are not enrolled 1n the preceding COMET01 clinical trial, risk of allergic reactions (anaphylaxis) cannot be completely ruled out because materials of animal origin (bovine serum, cells derived from mice, and trypsin derived from porcine pancreas) are used for manufacturing of the investigational product. Item [2] was defined to monitor allergic reactions throughout the study period.

For item [3], risk of known zoonosis or cryptogenic and unknown infection cannot be completely ruled out. Item [3] was defined to monitor any occurrence of such infections throughout the study period.

## Response Assessment Committee

The response assessment committee is established to evaluate the severity of LSCD according to LSCD classification, one of efficacy endpoints, and independently from the study site or the sponsor. The response assessment committee uses photos with subjects and time points randomized and masked in advance to evaluate the severity.

If there is any discrepancy in the evaluation between the response assessment committee and the investigator/sub investigator, the evaluation by the response assessment committee precedes. Details are defined in a separate written procedure.

# Measures for Adverse Events and Malfunctions

## Definition of Adverse Event and Malfunction

### Adverse Event

An adverse event is any unfavorable and unintended sign (including an abnormal laboratory finding), symptom, or disease that occurs during the trial period, whether considered related to the investigational product.

In this trial, an event of Grade ≥1 of CTCAE v4.0,24) the severity criteria for adverse events, will be defined as an adverse event and collected. However, events localized in the eye will be classified into three levels of severity (mild, moderate, or severe), and a mild or severer event will be defined as an adverse event and collected.

If pre-existing concomitant illness observed before consent to participation in the COMET01 Trial worsens after examination and observation at Week 52 in the COMET01 Trial, it will also be defined as an adverse event and collected.

The name of the adverse event, seriousness, date of onset, outcome, day of outcome assessment, severity, relationship with the investigational product or tissue collection, reason(s) for causality judgment, and, if necessary, details of the treatment/course of the event will be recorded on the Case Report Forms (CRFs). When a diagnosis is specified by signs or symptoms, priority will be given to the diagnosis over individual signs and symptoms. When a diagnosis is not specified by signs or symptoms, the investigator or sub investigator will record individual signs and symptom as adverse events. If an event once disappears and then reappears, the one that reappears will be handled as a new adverse event.

### Malfunction

An adverse event for which a causal relationship with the investigational product cannot be ruled out is defined as a malfunction.

### Serious Adverse Events

A serious adverse event is any adverse event that

results in death;

is life-threatening;
The term “life-threatening” here refers to an event in which the subject was at risk of death at the time of the event; it does not refer to an event that hypothetically might have caused death if it were more severe.

requires inpatient hospitalization or results in prolongation of existing hospitalization;

results in persistent or significant disability/incapacity;

is a congenital anomaly/birth defect; and

is a medically important event.
The term “a medically important event” here refers to an important medical event that might not be immediately life-threatening or result in death or hospitalization but might jeopardize the subject or might require intervention to prevent one of the other outcomes listed in the definition.

## Criteria for Severity Assessment of Adverse Events

The investigator or sub investigator will assess the severity of adverse events using CTCAE v4.0 Japanese version.

Adverse events localized in the eye will be classified into three levels of severity (mild, moderate, or severe) as follows:

- mild: signs or symptoms that are easily bearable,
- moderate: signs or symptoms that interfere with daily activities, and
- severe: signs or symptoms that hinder work or daily activities.

## Criteria for Causality Assessment

The causal relationship to the investigational product will be assessed according to the criteria shown in Table 2, and the reason(s) for the judgment will be recorded.

Table 2 Criteria for Assessing Causal Relationship to the Investigational Product

| Causal relationship to the investigational product | Criteria for causality assessment |
| --- | --- |
| Can be ruled out | There is no relationship between the onset of the event and the investigational product; i.e., it can be medically explained that the factor(s) other than the investigational product, such as underlying disease, concomitant illness, concomitant medication, and concomitant therapy, is(are) highly involved. |
| Cannot be ruled out | The onset of the event is undeniably correlated with the investigational product and cannot be explained by underlying disease, concomitant illness, concomitant medication, or concomitant therapy. |

## Assessment/Follow-up of Adverse Events

Any adverse event that occurs during the trial and for which a causal relationship to the investigational product cannot be ruled out will be followed until symptoms resolve or stabilize.

If, during follow-up, an adverse event progresses to the level of a “serious adverse event” or a new serious adverse event for which a causal relationship to the investigational product cannot be ruled out develops, the investigator shall promptly report to the Sponsor and head of the institution using the “Serious Adverse Event Report form” prescribed by each institution. The follow-up can be terminated if, based on the follow-up, the investigator or sub investigator decides that the causal relationship to the investigational product can be ruled out or the follow-up of the subject is no longer necessary.

The Sponsor will code adverse event terms used by the investigator or sub investigator to the standard terms using MedDRA/J.

Medical validity of the coding will be determined by the Sponsor in consultation with the person responsible for safety information, medical expert, etc., as necessary. When reporting, the verbatim terms as used by the investigator or sub investigator will also be used; however, for summary/statistical analysis, MedDRA/J terms will be used.

## Measures for Serious Adverse Events or Important Malfunctions

In the event of development of a “serious adverse event” or an “important malfunction,” the investigator or sub investigator shall immediately take appropriate action to protect the subject, notify the Sponsor by fax or phone, or in person, within 24 hours (or on the following business day in the case of night/weekends/holidays), and promptly report to the Sponsor and head of the institution using the “Serious Adverse Event Report form” prescribed by the institution. The investigator or sub investigator will supply the Sponsor, head of the institution, and IRB with any additional requested information.

Any further or more detailed information will also be promptly reported in writing to the Sponsor and head of the institution.

When the aforementioned information is obtained, the Sponsor will notify other institutions within 24 hours in principle.

| Contact information of the Sponsor  Japan Tissue Engineering Co., Ltd.  Person responsible for the clinical trial: Hidemasa Kawamoto, Clinical Development Division, Clinical Development Department |
| --- |

## Adverse Events Expressed in Previous Clinical Studies

The following is a list of adverse events that have been developed in clinical studies conducted so far in our group.

1. Corneal regeneration by autologous cultivated oral mucosal epithelial cell sheet transplantation (January, 2003 May, 2005) 20)

|  | Adverse event name | Total number of participants  (number of subjects: 4 cases) |
| --- | --- | --- |
| Eye symptoms and findings | Corneal neovascularization (target eye) | 4 |
| Corneal epithelial defect (target eye) | 4 |
| Eye pain (target eye) | 3 |
| Soft contact lens shedding (target eye) | 1 |
| Increased intraocular pressure (fellow eye) | 1 |
| Ophthalmalgia (fellow eye) | 1 |
| Systemic symptoms | Thromboembolism | 1 |
| Headache | 3 |
| Fever | 1 |
| Vomit | 1 |
| Otalgia | 1 |
| Frequent urination | 1 |
| Constipation | 2 |
| Diarrhea | 1 |
| Pain | 1 |
| Sleeplessness | 2 |
| Increased cholesterol | 1 |

1. Clinical study of autologous oral mucosal epithelial sheet transplantation for intractable corneal disease (July, 2005 February, 2007)21)

|  | Adverse event name | Total number of participants (number of subjects: 6 cases) |
| --- | --- | --- |
| Eye symptoms and findings | (Sheet transplantation)  Post-transplant eye pain, foreign matter sensation | 4 |
| (Amniotic removal)  Intraoperative epithelial sheet detachment | 1 |
| (Amniotic removal)  Postoperative pain, foreign matter sensation | 1 |
| Corneal epithelial defect | 3 |
| Eye pain, foreign matter sensation | 5 |
| Contact lens shedding | 10 |
| Inflammation of the surface of the eye | 2 |
| Conjunctival relaxation | 2 |
| High eye pressure | 1 |
| Double Anterior Chamber | 1 |
| Systemic symptoms | (Fat taken)　Intraoperative oxygen desaturation | 3 |
| (Fat taken)　Intraoperative heart rate drop | 1 |
| (Fat taken)　 Postoperative abdominal pain | 4 |
| (Fat taken)　 Postoperative subcutaneous hemorrhage | 1 |
| (Oral mucosa taken) Intraoperative heart rate drop | 1 |
| (Oral mucosa taken) Postoperative pain, discomfort | 4 |
| (Sheet transplantation) Increased blood pressure during transplantation | 2 |
| (Sheet transplantation) Oxygen desaturation during transplantation | 1 |
| (Sheet transplantation) Pain in the lower extremities during transplantation | 1 |
| (Sheet transplantation) Extra-phase contraction during transplantation | 1 |
| (Sheet transplantation) Decreased blood pressure during transplantation | 1 |
| (Sheet transplantation) Headache after transplantation | 1 |
| (Sheet transplantation) Chills after transplantation | 1 |
| (Sheet transplantation) Nausea, vomiting after transplantation | 3 |
| (Amniotic removal) Increased intraoperative blood pressure | 1 |
| Fever | 3 |
| Cold | 1 |
| Wet cough | 1 |
| Sore throat | 1 |
| Chest pain | 1 |
| Numbness in the hands | 1 |
| Numbness at the fingertips | 2 |
| Elbow pain | 1 |
| Constipation | 3 |
| Diarrhea | 1 |
| Sleepless | 2 |
| Fatigue | 1 |
| Malaise | 1 |
| Hepatic dysfunction | 2 |
| Bruises on the legs at home | 1 |

1. Clinical study of autologous oral mucosal epithelial sheet transplantation for LSCD (From February 2011 (*Interim data until December 2014))

|  | Adverse event name | Total number of participants (number of subjects: 21 cases) |
| --- | --- | --- |
| Eye symptoms and findings | Conjunctival injection | 51 |
| Symblepharon | 8 |
| Superficial punctate keratopathy | 31 |
| Corneal epithelial defect | 42 |
| Conjunctivation | 17 |
| Subjective symptoms (eye pain) | 20 |
| Subjective symptoms (foreign matter sensation) | 11 |
| Subjective symptoms (lacrimation) | 19 |
| Subjective symptoms (Photophobia) | 38 |
| Corneal infections | 1 |
| Postoperative pain | 3 |
| Soft contact lens shedding  Therapeutic contact lens shedding | 88 |
| Increased intraocular pressure (target eye) | 16 |
| Increased intraocular pressure (fellow eye) | 2 |
| Cataract (target eye) | 3 |
| Cataract (fellow eye) | 2 |
| Optic disc hemorrhage (target eye) | 1 |
| Reverse eyelashes (target eye) | 1 |
| Endothelial rejection (target eye) | 1 |
| Macular edema (target eye) | 3 |
| Systemic symptoms | Intracranial bleeding | 1 |
| Paresthesia | 2 |
| Acne in the face | 1 |
| Fever | 1 |
| Malaise | 1 |
| Nausea | 2 |
| Vomit | 1 |
| Dizziness | 1 |
| Tracheitis | 1 |
| Upper respiratory tract infection, inflammation | 7 |
| Cold | 2 |
| Otitis media | 1 |
| Rhinitis | 1 |
| Sinusitis | 1 |
| Left upper lip laceration | 1 |
| Abdominal pain | 1 |
| Lower back pain | 1 |
| Inguinal hernia | 1 |
| Bleeding from the urethra | 1 |
| Constipation | 1 |
| Sleepless | 1 |
| Extreme fatigue | 1 |
| Localized edema | 1 |
| Hypoglycemia | 1 |
| Leukocyte increase | 1 |
| Increased aspartate aminotransferase | 2 |
| Increased alanine aminotransferase (rise) | 3 |

# Agreement on, Deviations from, and Changes and Amendments of the Protocol

## Agreement on the Protocol

The investigator will carefully consider the ethical and scientific justification for the conduct of the trial based on the protocol and other necessary documents/information provided by the Sponsor. The same will apply when the protocol is revised.

After the consideration, to prove that the investigator and Sponsor reached an agreement on the content of the protocol and compliance with it, the investigator, together with the Sponsor, will affix their name and seal (or signature) and date to an agreement document specified separately. The protocol agreement date will be defined as the date of signature of either of them, whichever comes later.

The Sponsor will submit the agreed protocol and its amendment(s), if any, with reasons for amendment(s) to the IRB in writing and obtain approval.

## Deviations from the Protocol

The investigator or sub investigator will document any deviation from the protocol regardless of the reason.

## Deviations from, or Changes of, the Protocol to Eliminate Immediate Hazards to Subjects or for Other Unavoidable Medical Reasons

In principle, deviations from, or changes of, the protocol should not be implemented. However, under medically unavoidable circumstances or when approval is obtained from the IRB and the head of the institution, the following measures will be taken:

The investigator will immediately submit the document describing all information, including the deviation from the protocol to be implemented and the reasons for it, to the Sponsor and head of the institution, retain its copy, and obtain approval from the IRB.

The investigator will discuss, as soon as possible, with the Sponsor any change of the protocol to be implemented that may significantly affect the conduct of the trial and/or increase the risk to subjects and obtain approval from the head of the institution as well as the IRB and written agreement with the Sponsor on the amended protocol.

Under medically unavoidable circumstances, such as to eliminate an immediate hazard(s) to subjects, the investigator may implement a deviation from, or a change of, the protocol without prior written agreement with the Sponsor or prior approval from the IRB. The investigator will then submit the document describing all information, including the implemented deviation from the protocol and the reasons for it, to the head of the institution and IRB and obtain written agreement with the Sponsor.

## Protocol Amendment

When changes of the protocol become necessary during the trial or are required by individual institutions, the Sponsor can amend the protocol in consultation with the medical expert and/or coordinating investigator, as necessary. When the protocol is amended, the Sponsor will inform the investigators in all institutions of the amendment(s) made in writing. After careful consideration of the ethical and scientific justification of the amendments made, the investigator, together with the Sponsor, will affix their name and seal (or signature) and date to an agreement document specified separately, to prove that the investigator agrees on the content of the amended protocol and compliance with it. The investigator's agreement is not necessarily required for the changes of attachments.

# Premature Termination or Suspension of the Entire Trial

## Discontinuation or Suspension Criteria

Ethically or medically unavoidable circumstances, such as to ensure the safety of subjects

The trial determined not to be continued because of problems in quality, efficacy, or safety of the investigational product

Development of the investigational product discontinued

## Discontinuation or Suspension Procedures

If the Sponsor notifies of discontinuation of development of the investigational product or premature termination or suspension of the trial, the head of the institution will promptly inform the investigator and IRB in writing and explain the details.

If the trial is prematurely terminated or suspended, the investigator will promptly inform the subjects and conduct appropriate therapy and follow-up.

# Completion of the Trial

Upon completion of the trial, the investigator will inform the head of the institution of the trial completion and provide a summary of the trial's outcome in writing.

The head of the institution will promptly inform the IRB and Sponsor of the trial completion and provide a summary of the trial's outcome in writing based on the trial completion report submitted by the investigator.

# Trial Period

October 1, 2016, to December 31, 2018

# Data Handling and Record Keeping

## Case Report Form

### Preparation of Case Report Forms

The investigator will ensure the accuracy, completeness, and legibility of the CRFs submitted to the Sponsor and the verifiability of their entries from source documents. The investigator will properly retain a copy of the submitted CRFs.

Before preparation of CRFs, the investigator will prepare “Signature/Seal List.”

In preparation of CRFs, the investigator, sub investigator, and clinical research coordinator will use the signature or seal registered in the “Signature/Seal List.”

After completion of the tests/assessments determined in the trial schedule, the investigator, sub investigator, or clinical research coordinator will promptly prepare CRFs of the trial according to the “Guidance on Preparation, Change, or Correction of Case Report Forms” and submit them to the Sponsor.

### Correction of Case Report Forms

The investigator, sub investigator, or clinical research coordinator will correct CRFs according to the “Guidance on Preparation, Change, or Correction of Case Report Forms.”

If any discrepancy is found in the CRFs collected, the Sponsor will make a query to the investigator or sub investigator. If correction of CRF entries is considered necessary, the Sponsor will request the investigator or sub investigator to correct them.

### Specification of Entries in the Case Report Forms to Be Regarded as Source Document

CRF entries or electronic data of (1)–(6) as follows can be used as source document.

Reason(s) for administration of concomitant medication/therapy

Severity and seriousness of adverse events and judgment on the causal relationship between adverse events and the investigational product, etc.

Photographs

Information on the therapy administered and medication prescribed in other department or hospital

Reason(s) for withdrawal, measures taken and outcome after withdrawal, and record of action taken for subjects who did not make a visit

Other comments of the investigator and sub investigator

## Record Keeping

#### Institution

The head of the institution or a person responsible for record keeping will properly maintain the trial documents and/or records to be retained at the institution according to the rules of each institution. The storage period will be until the date of marketing authorization of the cellular and tissue-based products relevant to the investigational product or the date 3 years after the date of discontinuation or completion of the trial, whichever comes later.

#### Investigator

The investigator will properly maintain records, including a copy of the records of changes and corrections of CRFs and a copy of CRFs with the name and seal (or signature) affixed. The storage period will be the same as that of “1) Institution.”

#### Sponsor

The sponsor will maintain the records and documents shown as follows until the date 5 years after the date of marketing authorization of the investigational product or the date 3 years after the date of discontinuation or completion of the trial, whichever comes later.

Protocol

CRFs submitted from the institution and the data obtained by conducting the trial

Clinical Trial Agreement and notification documents from the head of the institution

Clinical study reports

Records of monitoring, audit(s), and other functions relevant to sponsoring and management of the trial

Other trial-related documents or their copy prepared by the Sponsor

When the storage period of records [1] and [2] ends or needs to be extended, the Sponsor will promptly inform the head of the institution and investigator in writing.

## Acceptable Range of Test/Observation Schedule

The acceptable range of the test/observation schedule is shown in Table 3.

Table 3 Acceptable Range of Test/Observation Schedule

| Test/observation schedule | Acceptable range |
| --- | --- |
| Week 78 of transplantation of the investigational product | Within ±28 days of the scheduled day |
| Week 104 of transplantation of the investigational product | Within ±56 days of the scheduled day |
| The day of additional treatment (before treatment) | Within -35 days of the scheduled day |
| Day of completion of follow-up | The day of completion |
| Day of withdrawal | Within +35 days of the day of withdrawal |

# Statistical Analysis

## Determination of Sample Size

To be the same as the number of patients enrolled in the COMET01 Trial and transplanted with the investigational product

## Definition of Analysis Sets

### Efficacy Analysis Set

The following cases shall be excluded from cases with the consent of participation in this clinical trial.

1. A case in which no observation on the efficacy evaluation item has been carried out

### Safety Analysis Set (Safety)

The safty analysis set includes all cases who have obtained consent of participation in this clinical trial.

## The case which obtained the consent of this clinical trial participation is made to be the safety analysis target group. Statistical Analysis Methods

The statistical analysis personnel will prepare the statistical analysis plan, which describes the contents of this section in a more technical and detailed manner, immediately after the clinical protocol is finalized, in accordance with the SOP.

### Efficacy

The following analyses will be performed based on the efficacy analysis set.

#### Success rate of corneal epithelium reconstruction (%) at Week 104 after transplantation of the investigational product

The condition of the target eye that is evaluated as Stage IA to C at Week 104 will be considered successful. The success rate of corneal epithelium reconstruction (%) will be calculated. In addition, the number and percentage of patients with success at Week 104 by success or failure at Week 52 will be calculated.

1. Severity of LSCD after transplantation of the investigational product
   The time course of severity will be assessed.
2. Subjective symptom
   For each symptom, the time course of severity will be assessed.
3. Corrected visual acuity

Visual acuity measured with a conventional Landolt ring chart:
Decimal visual acuity will be converted to logMAR, and the time course of change from baseline (value at screening in the COMET01 Trial) will be assessed.

Visual acuity measured with the ETDRS chart:
The time course of change from baseline (value at screening in the COMET01 Trial) will be assessed.

1. QOL assessment
   In the NEI VFQ-25, the scores on 12 subscales as follows will be calculated, and the total score using 10 subscales (“General health” and “Driving” were excluded from the 12 subscales) will be calculated.

- General health
- General vision
- Ocular pain
- Near activities
- Distance activities
- Vision-specific social functioning
- Vision-specific mental health
- Vision-specific role difficulties
- Vision-specific dependency
- Driving
- Color vision
- Peripheral vision

Summary statistics of the total score at Week 104, on the day of additional treatment (before treatment), and at discontinuation will be calculated and assessed.

1. Corneal opacity severity
   The time course of severity will be assessed.
2. Corneal neovascularization severity
   The time course of severity will be assessed.
3. Symblepharon severity
   The time course of severity will be assessed.
4. Contribution to restoration of the corneal surface in patients who received additional treatment
   The number and percentage of patients who received additional treatment by presence or absence of contribution to restoration of corneal surface will be calculated.
5. Severity of LSCD in the fellow eye, subjective symptoms, corrected vision, degree of corneal opacity, degree of corneal neovascularization, degree of symblepharon

Each evaluation item of the fellow eye is compared with the investigational product transplant eye.

### Safety

#### Number of patients with adverse events and malfunctions and incidence (%)

The number of patients with adverse events will be summarized, and the incidence (%) and its two-sided 95% confidence interval will be calculated. Similar analyses will be performed for malfunctions. Analyses will also be performed by causal relationship, severity, and seriousness.

Adverse events and malfunctions in the local area of the eye and those in the other areas will be analyzed separately.

#### Number of patients with important malfunctions and incidence (%)

The number of patients with important malfunctions will be summarized throughout the clinical study period, and the incidence (%) and its two-sided 95% confidence interval will be calculated.

## Pooled Analysis

The subject's background, efficacy, and safety data will be combined with those of the COMET01 Trial and analyzed.

## Other

Any missing data will not be complemented.

# Ethical Considerations

## Protection of Subjects

### Confidentiality

Once informed consent is obtained from a subject, the investigator or sub investigator and clinical research coordinator will use the serial registration number assigned to the subject, not the subject's name or other identifications, to respect their confidentiality.

Even if a person involved in the trial, such as the monitor and auditor, designated by the Sponsor, became aware of the subject's private information through direct access to source documents or other records, the information shall not be disclosed to any third party.

## Informed Consent

### Preparation of the Written Information and Informed Consent Form

With the help of the Sponsor, the investigator will prepare, and revise when necessary, the written information and informed consent form used to obtain consent from patients themselves for participation in the trial. The Sponsor will cooperate with the investigator by providing documents/information necessary to prepare the written information and informed consent form. The written information and informed consent form need to be prepared accurately using plain terms that are practical and easy to understand so that they are comprehensible to all patients. The document or form thus prepared, or revised, will be used after obtaining approval from the IRB of the institution.

### Acquisition of Consent

Before implementation of the tests/observation in the observation period, the investigator or sub investigator will provide an explanation to the subject in plain language using the written information so that they can fully understand.

The investigator or sub investigator will provide the subject ample time to consider participation in the trial and, after confirming the subject's understanding of the content, obtain voluntary written consent from the subject using the informed consent form.

When selecting a person who is likely to suffer unreasonable disadvantages by not participating in the clinical trial, special care shall be taken to ensure that the consent of the subject is voluntarily conducted.

Each of the investigator or sub investigator who gave the explanation (and the study collaborator if he/she gave supplemental explanation) and the subject will affix their signature (or name and seal) and date to the informed consent form.

The investigator or sub investigator will provide the subject with a copy of the informed consent form with the signature (or name and seal) affixed, together with the written information, properly retain the original according to the rules of the institution, and provide access to it if requested by the monitor, auditor, etc.

In “Day of informed consent” in the CRFs, the date when the consent was obtained will be entered.

### Written Information

The written information will include explanations of the following:

That the trial involves research

The purpose of the trial

The design of the trial

The reasonably expected clinical benefits and reasonably foreseeable risks or inconveniences

The expected duration of the subject's participation in the trial

The expected number of subjects involved in the trial

The alternative procedure(s) or course(s) of treatment that may be available to the subject and their important potential benefits and risks

The compensation and treatment available to the subject in the event of trial-related injury

That the subject's participation in the trial is voluntary and that the subject may refuse to participate or withdraw from the trial, at any time, without penalty or loss of benefits to which the subject is otherwise entitled

That the subject will be informed in a timely manner if information becomes available that may affect the subject's willingness to continue participation in the trial

The foreseeable circumstances and/or reasons under which the subject's participation in the trial may be terminated

That the monitor(s), auditor(s), IRB, and regulatory authority(ies) will be granted direct access to the source documents related to the subject's medical care, without violating the confidentiality of the subject, and that, by affixing the subject's signature or name and seal to an informed consent form, the subject is authorizing such access

That the subject's privacy will remain confidential even if the results of the trial are published

The anticipated payment, if any, to the subject

The anticipated expenses, if any, to the subject

The name, title, and contact information of the investigator and sub investigator

The help desk of the institution to contact for further information regarding the trial and the rights of the subjects and to which inquiries are made or where to contact in the event of trial-related injury

The subject's responsibilities

That if the subject is being treated by another doctor, the other doctor will be notified of the subject's participation in the trial

Type of the IRB reviewing/deliberating the appropriateness of the trial, etc., matters reviewed/deliberated by each IRB, and other matters concerning the IRB involved in the trial

That raw materials of animal origin (bovine serum, mouse embryo-derived cells, and pig pancreas-derived trypsin) are used for manufacturing the investigational product and, although safety measures against transmission of infections are taken, the risk of infections from these materials cannot be totally ruled out

Cytogenetic changes were observed in the autologous cultivated oral mucosal epithelial cell sheet before the change in production method, but no abnormalities were observed in clinical studies. A nuclear type test and a soft agar colony formation test are performed using a part of the collected oral mucosal tissue, but the risk of tumorization due to transplanted cells is not completely excluded. The test results will be found after transplantation of the investigational product. In addition, follow-up after transplantation of the investigational product is performed, and appropriate treatment should be taken when abnormalities are observed.

### Provision of New Safety Information and Revision of the Written Information and Informed Consent Form

During the trial period, the investigator will secure the means of communication with the subject in case of an emergency and try to transfer safety information to the subject and collect new safety information by conducting examinations, tests, etc., at each test/observation schedule.

The sponsor will revise the written information and informed consent form according to the following procedures whenever important new information regarding the safety of the investigational product becomes available that may be relevant to continuation/premature termination of the trial or the subject's willingness to continue participation in the trial.

The sponsor will immediately provide the investigator and the head of the institution with this information.

The investigator or sub investigator will immediately provide the subject with this information, ascertain whether the subject is willing to continue participation in the trial, and document the provision of the information and willingness of the subject on the clinical record.

The investigator will discuss with the Sponsor and promptly revise the written information and informed consent form based on this information whenever deemed necessary. The investigator will obtain approval on the revised written information and informed consent form from the IRB of the institution.

Even to the subject who has already been informed of the information in person, the investigator or sub investigator will give an explanation again using the written information revised according to provision 3) and obtain consent to continue to participate in the trial using the informed consent form. Each of the investigator or sub investigator who gave the explanation (and the study collaborator if he/she gave supplemental explanation) and the subject will affix their signature (or name and seal) and date to the informed consent form. The investigator or sub investigator will provide the subject with a copy of the informed consent form with their signature (or name and seal) affixed, together with the written information, and properly retain the original in the same manner as the first time when the consent was obtained.

## Compensation to the Subject in the Event of Trial-related Injury

In the event of a trial-related injury, the institution will take necessary measures, such as therapy of the subject, and the Sponsor will pay the subject's copayment of the medical expenses for the therapy (the expenses excluding the health insurance benefits).

If compensation is required because of a trial-related injury, the Sponsor will pay the compensation.

The method and manner of the compensation will be according to the Relief System for Infections Acquired through Biological Products.

If a dispute arises or may arise with a subject or third party because of a trial-related injury, the institution shall immediately notify the Sponsor, and the institution and Sponsor will cooperate to settle the dispute.

If legal liability arises because of a trial-related injury, the Sponsor will accept the liability except where the institution is responsible. If it is not known which party is responsible, the institution and Sponsor will discuss in good faith to settle the problem.

The Sponsor will conclude a contract with an insurance company as a measure to ensure payment of the compensation/indemnity.

# Monitoring and Audit

## Direct Access to Source Documents, etc.

To ensure that the trial is being conducted properly and the reliability of the data is adequately assured, the Sponsor will perform monitoring and audit and directly access the trial-related records including source documents. The IRB and regulatory authority(ies) will also be granted direct access to the source documents, etc., for review/inspection.

The investigator and head of the institution will provide direct access to necessary trial-related documents for monitoring and audit by the Sponsor, or for the IRB and the regulatory authority(ies). The subject is authorizing such access by signing an informed consent form.

The “source documents” indicate records necessary for the reconstruction and evaluation of the course of events of the trial, such as medical records and examination slips. Specifically, they include the informed consent form, medical records, and any records retained in the product management department, laboratories, and medical technology department involved in the trial.

## Monitoring

To verify that the rights, safety, and well-being of subjects are protected; that the conduct of the trial follows the currently approved protocol/amendment(s), GCP, and SOPs; and that the trial data reported by the investigator or sub investigator are accurate, complete, and verifiable from trial-related records, such as source documents, the sponsor will conduct periodic on-site monitoring in principle and also monitoring by phone, fax, etc.

# Quality Control and Quality Assurance

## Quality Control

The Sponsor will implement quality control of the trial by performing the following trial-related activities according to the Sponsor's SOPs.

Explanation of the protocol to the investigator and sub investigator

Periodic monitoring of the institution

Preparation of guidance for preparation, change, or correction of CRFs

Review of the entries on CRFs

## Quality Assurance

To verify whether the trial is conducted in compliance with GCP, the protocol, and the SOPs of the Sponsor, institution, and other institutions involved in conducting the trial, the auditors in the audit department, who are independent of and separate from those for routine monitoring or quality control functions, will perform audits in accordance with the SOPs of the Sponsor as part of implementing quality assurance activities. The person responsible for audit will prepare an audit report and audit certificate confirming that the audit has taken place.

# Burden of Trial-related Expenses

When subjects are paid to reduce financial burden of participation in the trial, etc., the payment will be made under the approval of the IRB after discussion between the institution and Sponsor. The method of payment will be discussed separately with the institution.

# Publication Policy

The Sponsor will use the information obtained from the trial for the purpose of acquiring marketing authorization for the investigational product for treatment of limbal stem cell deficiency. In the review for the marketing authorization, the reviewer(s) of the regulatory authority(ies) may access the trial documents, without violating the confidentiality of subjects.

The investigator or sub investigator who intends to present part or all the results of the clinical trial at medical society meetings or submit them to medical journals will discuss with the Sponsor and coordinating investigator whether it is acceptable. The confidentiality of the subjects will be protected when publishing.

# References

1. Thoft RA, Friend J: The X, Y, Z hypothesis of corneal epithelial maintenance. *Invest Ophthalmol Vis Sci* **24(10)**: 1442-1443 (1983)
2. Cotsarelis G, Cheng SZ, Dong G, Sun TT, Lavker RM: Existence of slow-cycling limbal epithelial basal cells that can be preferentially stimulated to proliferate: implications on epithelial stem cells. *Cell* **57(2)**: 201-209 (1989)
3. Nishida K: Tissue engineering of the cornea. *Cornea* **22(7 Suppl)**: S28-S34 (2003)
4. Nishida K, Watanabe H: 4. Corneal epithelial transplantation. In: Corneal Clinic, 2nd ed. (Manabe R, Kinoshita S, Ohashi Y, supervising eds.). Igaku-Shoin, Tokyo, pp.261-263 (2003)
5. Ilari L, Daya SM: Long-term outcomes of keratolimbal allograft for the treatment of severe ocular surface disorders. *Ophthalmology* **109(7)**: 1278-1284 (2002)
6. Tsubota K, Satake Y, Kaido M, Shinozaki N, Shimmura S, Bissen-Miyajima H, Shimazaki J: Treatment of severe ocular-surface disorders with corneal epithelial stem-cell transplantation. *N Engl J Med* **340(22)**: 1697-1703 (1999)
7. Dua HS, Azuara-Blanco A: Autologous limbal transplantation in patients with unilateral corneal stem cell deficiency. *Br J Ophthalmol* **84(3)**: 273-278 (2000)
8. Kenyon KR, Tseng SC: Limbal autograft transplantation for ocular surface disorders. *Ophthalmology* **96(5)**: 709-722 (1989)
9. Liang L, Sheha H, Li J, Tseng SC: Limbal stem cell transplantation: new progresses and challenges. *Eye (Lond)* **23(10)**: 1946-1953. (2009)
10. Kheirkhah A, Raju VK, Tseng SC: Minimal conjunctival limbal autograft for total limbal stem cell deficiency. *Cornea* **27(6)**:730-733 (2008)
11. Chen JJ, Tseng SC: Corneal epithelial wound healing in partial limbal deficiency. *Invest Ophthalmol Vis Sci* **31(7)**: 1301-1314 (1990)
12. Dua HS, Saini JS, Azuara-Blanco A, Gupta P: Limbal stem cell deficiency: concept, aetiology, clinical presentation, diagnosis and management. *Indian J Ophthalmol* **48(2)**: 83-92 (2000)
13. Burillon C, Huot L, Justin V, Nataf S, Chapuis F, Decullier E, Damour O: Cultured autologous oral mucosal epithelial cell sheet (CAOMECS) transplantation for the treatment of corneal limbal epithelial stem cell deficiency. *Invest Ophthalmol Vis Sci* **53(3)**: 1325-1331 (2012)
14. Yamato M, Konno C, Utsumi M, Kikuchi A, Okano T. Thermally responsive polymer-grafted surfaces facilitate patterned cell seeding and co-culture. *Biomaterials*. **23**: 561-7 (2002)
15. Shimizu T, Yamato M, Isoi Y, Akutsu T, Setomaru T, Abe K, et al. Fabrication of pulsatile cardiac tissue grafts using a novel 3-dimensional cell sheet manipulation technique and temperature-responsive cell culture surfaces. *Circ Res*. **90**: e40 (2002)
16. Hayashida Y, Nishida K, Yamato M, Watanabe K, Maeda N, Watanabe H, et al. Ocular surface reconstruction using autologous rabbit oral mucosal epithelial sheets fabricated ex vivo on a temperature-responsive culture surface. *Invest Ophthalmol Vis Sci.* **46**:1632-9 (2005)
17. Hayashi R, Yamato M, Takayanagi H, Oie Y, Kubota A, Hori Y, et al. Validation system of tissue-engineered epithelial cell sheets for corneal regenerative medicine. *Tissue Eng Part C Methods.* **16**:553-60 (2010)
18. Hori Y, Sugiyama H, Soma T, Nishida K. Expression of membrane-associated mucins in cultivated human oral mucosal epithelial cells. *Cornea.* **26**:S65-9 (2007)
19. Sumide T, Nishida K, Yamato M, Ide T, Hayashida Y, Watanabe K, et al. Functional human corneal endothelial cell sheets harvested from temperature-responsive culture surfaces. *FASEB J.* **20**:392-4 (2006)
20. Nishida K, Yamato M, Hayashida Y, Watanabe K, Yamamoto K, Adachi E, et al. Corneal reconstruction with tissue-engineered cell sheets composed of autologous oral mucosal epithelium. *N Engl J Med.* **351**:1187-96 (2004)
21. Clinical Study on Cultivated Autologous Oral Mucosal Epithelial Sheet Transplantation for Treating Patients with Intractable Keratoconjunctival Disease 　*Clinical Research Report for Future Medicine*　P0402 　ID： UMIN000012819
22. Nakamura T, Takeda K, Inatomi T, Sotozono C, Kinoshita S. Long-term results of autologous cultivated oral mucosal epithelial transplantation in the scar phase of severe ocular surface disorders. *Br J Ophthalmol.* **95**:942-6 (2011)
23. Rama P, Matuska S, Paganoni G, Spinelli A, De Luca M, Pellegrini G: Limbal stem-cell therapy and long-term corneal regeneration. *N Engl J Med* **363(2)**: 147-155 (2010)
24. JCOG website URL <http://www.jcog,jp/>
