# Supplementary material
Source: Research Square preprint supplement (doi:10.21203/rs.3.rs-7181420/v1)
Supplement: Supplementary file 7 [file 8c2062e2f66c9624ed327153.docx]

**Prospective multicenter clinical study of autologous cultivated oral mucosal epithelial cell sheet transplantation for patients with limbal stem cell deficiency**

**Methods**

**Study oversight**

This clinical study is a prospective multicenter open-label, uncontrolled, single arm design study for the purpose of confirming efficacy and safety of this treatment. Study protocol was approved by institutional review boards of Osaka university hospital, Tohoku University hospital, Tokyo University hospital, Ehime University hospital. And it was also approved by the Minister of Health, Labor, and Welfare in Japan after a review by the Committee on Science and Technology of Health Sciences Council.

Written informed consent was obtained from all patients. The study was conducted according to tenets of Declaration of Helsinki. Clinical studies were registered as UMIN000005400 in Osaka University, UMIN000006745 in Tohoku University, UMIN000012260 in Tokyo University, UMIN000012264 in Ehime University. This study was conducted from 2011 February 10th to 2016 December 6th.

**Study protocol**

Patients with limbal stem cell deficiency of stage III were included in this study. [1] LSCD was diagnosed by conjunctival pannus under slit-lamp examination with fluorescein staining. Exclusion criteria included patients who are or may be pregnant, breast feeding, patients with infections, patients with severe dry eye, and patients with severe oral mucosal scar formation. Patients were followed up for two years. (For details, see Supplementary file (protocol for clinical study)) Primary endpoint was ocular surface reconstruction defined by corneal area ratio without conjunctivalization or epithelial defect at postoperative 1 year. (endpoint for efficacy) It was evaluated by the onsite ophthalmologists based on 6 grading as follows; 0:x=0%, 1:0%≤x≤10%, 2:10≤x≤25%, 3:25%≤x≤50%, 4:50%≤x≤75%, 5:75%≤x≤100%. Preoperative grading for all eyes was 5 because stage III means 100% corneal surface was covered by the conjunctiva. And improvement at 1 year to grading 2 or better was considered as effective.

Secondary endpoints were evaluated as follows. Decimal corrected distance visual acuity was converted into LogMAR (logarithm of the minimum angle of resolution) values, and improvement more than 2 lines was regarded as significant (endpoint for efficacy). Corneal opacification and neovascularization were graded 0 to 3 [2], and improvement of one or more grade was considered as significant (endpoint for efficacy). Expected ocular complications included corneal keratinization, conjunctival hyperemia, symblepharon formation, superficial punctate keratopathy, corneal epithelial defect, conjunctivalization, subjective symptom (ocular pain, foreign body sensation, lacrimation, photophobia), infectious keratitis, endophthalmitis, and neoplastic proliferation (endpoint for safety). All adverse events including abnormal laboratory findings were firstly rated evaluated in accordance with the “National Cancer Institute-Common Terminology Criteria for Adverse Events (NCI-CTCAE) (Japanese translation JCOG version) version 4.0, and eventually evaluated after conversion into Medical Dictionary for Regulatory Activities (MedDRA) /J verion18.1. (endpoint for safety)

**Cell culture and evaluation of cultivated oral mucosal epithelial cell sheet**

Autologous oral mucosal epithelial cells obtained from patient’s own cheek biopsy specimen (5mm x 10mm) were cultivated on temperature responsive culture surface of 3.5 cm diameter as previously reported. [3] Virus validated lethally irradiated 3T3-J2 cells from established working cell bank were used as feeder layers. All cell sheets were fabricated in GMP-grade facility under established standard operating procedures (SOPs). All procesures were guided and recorded under process management system. Cell sheets were evaluated under defined shipment criteria before transplantation, and only cell sheets that meet the criteria were used for transplantation (Supplementary Table 1). Colony forming efficiency (CFE) for primary culture was also evaluated.

**Transportation of tissue and cell sheet**

For patients in Osaka University hospital, Tokyo University hospital, Ehime University hospital, cell sheets were cultivated in GMP-facility in Osaka University. For patients in Tohoku University, cell sheets were cultured in Tohoku University. Oral mucosal tissue and cultivated oral mucosal epithelial cell sheets for patients in Tokyo and Ehime University hospitals were transported via airplane using transportation technique as previously reported. [4] Briefly, tissue was transported around 6 degree Celsius, cell sheets around 35 degree Celsius using a dedicated container. Temperature and air pressure inside the container were monitored recorded during transportation.

**Cell sheet transplantation and post-operative procedures**

One cell sheet was transplanted in each surgery as previously reported. [5] [6] Briefly, Conjunctival and subconjunctival scar tissue on the cornea were excised to expose bare corneal stroma up to 3 mm outside the limbus. Then, one harvested cell sheet was transplanted to the patient corneal stroma directly, and therapeutic soft contact lens was place on the cornea to protect ocular surface. Although simultaneous keratoplasty was not performed with cell sheet transplantation, penetrating or anterior lamellar keratoplasty was performed to recover corneal transparency in patients with corneal stromal scarring one year or more after cell sheet transplantation if necessary.

Postoperative local medication included topical antibiotics (0.5% cefmenoxime) and corticosteroids (0.1% betamethasone) four times a day, and betamethasone and fradiomycin ointment once a day. Betamethasone eye drop was converted to 0.1% fluorometholone three to six months after surgery depending on patient’s inflammation. Systemic steroid was administered as 125mg methylprednisolone surgery day, 2mg betamethasone for two days, 1mg betamethasone for one month with tapering. Because some patients were complicated with severe dry eye, artificial tears were also used to promote wound healing according to patient’s condition.

**Results**

**Characteristics of the patients**

26 eyes of 26 patients were assessed for eligibility. However, three patients were excluded before biopsy: one was positive for HTLV-1 (exclusion criteria), one withdrew the consent, and one discontinued because of severe systemic complication. Additionally, seeded cells from one patient did not grow enough for evaluation based on shipment criteria two times. Therefore, the study for the patient was terminated. Thus, 22 eyes of 22 patients with LSCD of stage III received COMET in this clinical study. Eight patients were enrolled in Osaka University hospital, six in Tohoku University hospital, four each in Ehime University hospital and Tokyo University hospital.

The mean age of the enrolled patients was 55.1±13.6 years (Median: 52, range from 33 to 88). 13 males and 9 females were included. LSCD was caused by chemical burns in 8 patients (7 alkali and 1 acid), Stevens-Johnson syndrome in 5, ocular cicatricial pemphigoid in 2, thermal burn in 2, idiopathic in 2, graft versus host disease in 1, Sjogren syndrome in 1, aniridia in 1. The mean value of Schirmer’s test was 12.3±9.2mm at 5 minutes. Eight patients had a history of previous allogeneic limbal transplantation, but all failed and returned to LSCD.

**Cultivation and transplantation of oral mucosal epithelial cell sheet**

Oral mucosal biopsy was obtained from 23 patients. Seeded cells from one patient did not grow enough for evaluation based on shipment criteria two times. Although two patients experienced biopsy two times because of contamination during cultivation or lack of fulfillment for shipment criteria, cultivated epithelial cell sheets were successfully obtained from the second biopsy. Thus, cell sheets from 22 patients were successfully cultivated, and met defined shipment criteria for cultivated cell, and thus were used for transplantation. (Supplementary Table 2) 14 patients in Osaka and Tohoku University hospitals received cell sheets cultivated in their own institute, and 8 patients in Tokyo and Ehime University hospitals received cell sheets cultured in Osaka University hospital via transportation. Temperature and air pressure were stable, and showed no abnormal rapid change that indicated breakage of container during transportation. All surgical procedures were successfully carried out. Eight eyes of 8 patients with corneal stromal scarring underwent keratoplasty to recover corneal transparency 12 to 24 months after COMET. Seven patients underwent penetrating keratoplasty, and one underwent deep lamellar anterior keratoplasty.

**Endpoints for efficacy and safety**

Primary endpoint, ocular surface reconstruction one year after COMET achieved in all of 22 eyes (85-100%; 95% confidence interval). 20 eyes (90.9%) were graded as 5, 1 eye (4.5%) as 4, and 1 eye (4.5%) as 2. Time course of grading was shown in Supplemental table3. Ocular surface status was maintained in a preferable condition over 2 years follow up period.

Visual acuity improved in 10 eyes (45.5%) at postoperative 1 month, 9 eyes (40.9%) at 3 months, 10 eyes (45.5%) at 6 months, 11 eyes (50.0%) at 12 months, 12 eyes (54.4%) at 18 months, 14 eyes (63.6%) at 24 months. Corneal opacification improved in 14 eyes (63.6%) at postoperative 2 weeks, 15 eyes (68.2%) at 1 month, 13 eyes (59.1%) at 3 months, 12 eyes (50%) at 6 months, 12 eyes (50%) at 12 months, 16 eyes (72.7%) at 18 months, 14 eyes (63.6%) at 24 months. Corneal neovascularization was improved in 17 eyes (77.3%) at postoperative 2 weeks, 18 eyes (81.8%) at 1 month, 18 eyes (81.8%) at 3 months, 17 eyes (77.3%) at 6 months, 15 eyes (68.2%) at 12 months, 16 eyes (72.7%) at 18 months, 15 eyes (68.2%) at 24 months. Actual visual acuity and gradings for corneal opacification and neovascularization were shown in supplementary tables 4-6.

As for expected ocular complications, corneal keratinization was observed in 1 eye (4.5%), conjunctival hyperemia in 19 eyes (86.4%), symblepharon formation in 5 eyes (22.7%), superficial punctate keratopathy in 14 eyes (63.6%), corneal epithelial defect in 20 eyes (90.9%), conjunctivalization in 11 eyes (50%), eye pain in 14 eyes (63.6%), foreign body sensation in 10 eyes (45.5%), lacrimation in 9 eyes (40.9%), photophobia in 10 eyes (45.5%), corneal infection in 1 eye (4.5%), endophthalmitis in 0 eye (0%), neoplastic proliferation in 0 eye (0%). 5 serious adverse events (SAE) were reported due to hospitalization or prolongation of existing hospitalization: elevated intraocular pressure in operated eye and fellow eye, cataract in operated eye, corneal epithelial defect in operated eye, encephalorrhagia (supplementary table7). Although ocular SAEs can be related protocol treatment in this study, all were successfully treated without permanent damage. Other adverse events were shown in supplementary table8. All of the adverse events were temporal or recovered without subsequent complications.

**Supplementary table1. Defined shipment criteria for cultivated cell sheet**

Items evaluation criteria

1) Phase contrast microscopy cobble stone-like cell morphology

2) Cell sheet harvest harvest without break

3) Total cell number 1x10^5 or more

4) Viability (flow cytometric analysis) 60% or more 7-AAD negative cells

5) Epithelial purity (flow cytometric analysis) 80% or more keratin positive cells

6) Stratification 2 layers or more

7) Stem/progenitor cells p63 positive cells in basal layer

8) Differentiated cells K3/67 positive cells in cell sheet

9) Barrier function ZO-1, MUC16 positive cells in superficial layer

10) Infection

(1) Endotoxin test less than 1.0EU/ml

(2) Sterility test (culture) negative

(3) Mycoplasma test (PCR) negative

**Supplementary Table2. Fabricated cell evaluation**

cultivation cell total cell

Patient institution　　　　 period recovery test　 number(x106) viability(%) purity(%) p63 AE5 ZO-1 MUC16 CFE

01-02 Osaka University 14 possible 1.51 81.5 84 + + + + 3.9

01-03 Osaka University 12 possible 1.56 90.1 89.1 + + + + 5.4

01-04 Osaka University 12 possible 1.89 95.6 89.1 + + + + 3

01-05 Osaka University 12 possible 1.26 75 98.6 + + + + 0.96

01-06 Osaka University 12 possible 2.02 88.7 98.2 + + + + 2.2

01-07 Osaka University 12 possible 1.47 61.9 94.6 + + + + 0.4

01-08 Osaka University 16 possible 1.25 75.9 98.3 + + + + 0.28

01-11 Osaka University 14 possible 1.08 79.9 96.1 + + + + 0.26

02-01 Tohoku University 17 possible 2.26 72.3 84.5 + + + + 0.6

02-02 Tohoku University 13 possible 1.08 74.4 80.2 + + + + 1.3

02-03 Tohoku University 13 possible 1.46 80.4 81.5 + + + + 2.2

02-04 Tohoku University 13 possible 1.67 71.7 80.6 + + + + 1.2

02-05 Tohoku University 13 possible 1.18 83.5 81.1 + + + + 0.9

02-07 Tohoku University 13 possible 1.5 80.3 83.3 + + + + 1.2

03-01 Tokyo University 14 possible 1.35 82.8 98.6 + + + + 0.64

03-03 Tokyo University 14 possible 1.46 78.8 98.5 + + + + 0.47

03-04 Tokyo University 14 possible 2.09 80.8 97.3 + + + + 0.5

03-05 Tokyo University 14 possible 1.43 78.2 88.4 + + + + 0.28

04-01 Ehime University 14 possible 1.25 70.1 96.7 + + + + 0.4

04-02 Ehime University 14 possible 1.35 77.2 96.6 + + + + 2.1

04-03 Ehime University 14 possible 1 87.7 98.5 + + + + 1.1

04-04 Ehime University 14 possible 2.01 79.9 98.5 + + + + 1.27

**Supplemental Table3. Evaluation of conjunctivalization and corneal epithelial defect in cornea (primary endpoint)**

| Institution | Patient | Age | Gender | Causative disease | Grading | | | | | |
| --- | --- | --- | --- | --- | --- | --- | --- | --- | --- | --- |
| Preoperative | 2 weeks | 1 month | 3 months | 6 months | 1 year |
| Osaka University | 01-02 | 80 | F | MMP | 0 | 5 | 5 | 5 | 5 | 5 |
| 01-03 | 36 | F | Idiopathic | 0 | 5 | 5 | 5 | 5 | 5 |
| 01-04 | 75 | M | Alkali burn | 0 | 5 | 5 | 5 | 5 | 5 |
| 01-05 | 52 | F | SJS | 0 | 5 | 5 | 5 | 5 | 5 |
| 01-06 | 48 | M | Idiopathic | 0 | 5 | 5 | 5 | 5 | 5 |
| 01-07 | 42 | M | Alkali burn | 0 | 5 | 5 | 5 | 5 | 5 |
| 01-08 | 64 | F | SJS | 0 | 5 | 4 | 5 | 5 | 5 |
| 01-10 | 52 | M | Thermal burn | 0 | 5 | 5 | 5 | 5 | 4 |
| Tohoku University hospital | 02-01 | 36 | M | Alkali burn | 0 | 5 | 5 | 5 | 5 | 5 |
| 02-02 | 70 | F | SJS | 0 | 3 | 2 | 5 | 5 | 5 |
| 02-03 | 63 | F | Sjogren's syndrome | 0 | 5 | 5 | 5 | 5 | 2 |
| 02-04 | 52 | F | SJS | 0 | 5 | 5 | 5 | 5 | 5 |
| 02-05 | 48 | M | Alkali burn | 0 | 5 | 5 | 5 | 5 | 5 |
| 02-07 | 33 | M | Thermal burn | 0 | 5 | 5 | 5 | 5 | 5 |
| Tokyo University hospital | 03-01 | 53 | M | Acid burn | 0 | 2 | 4 | 5 | 5 | 5 |
| 03-03 | 78 | F | MMP | 0 | 1 | 4 | 5 | 5 | 5 |
| 03-04 | 45 | M | Alkali burn | 0 | 5 | 5 | 5 | 5 | 5 |
| 03-05 | 65 | F | SJS | 0 | 4 | 4 | 5 | 4 | 4 |
| Ehime University hospital | 04-01 | 45 | M | Alkali burn | 0 | 5 | 5 | 5 | 5 | 5 |
| 04-02 | 66 | M | Alkali burn | 0 | 4 | 4 | 5 | 5 | 5 |
| 04-03 | 59 | M | aniridia | 0 | 5 | 5 | 5 | 5 | 5 |
| 04-04 | 50 | M | GVHD | 0 | 5 | 5 | 5 | 5 | 5 |

MMP: mucous membrane ocular cicatricial pemphigoid, SJS: Stevens-Johnson syndrome,

**Supplemental Table4. Decimal visual acuity following cultivated oral mucosal epithelial transplantation**

| Institution | Patient | Age | Gender | Causative disease | Pre  operative | 2 weeks | 1 month | 3 months | 6 months | 1 year | 1 year  6 months | 2 years |
| --- | --- | --- | --- | --- | --- | --- | --- | --- | --- | --- | --- | --- |
| Osaka University | 01-02 | 80 | F | MMP | 0.01 | 0.2 | 0.15 | 0.15 | 0.4 | 0.15 | 0.2 | 0.01 |
| 01-03 | 36 | F | Idiopathic | 0.01 | 0.03 | 0.04 | 0.15 | 0.09 | 0.03 | 0.03 | 0.01 |
| 01-04 | 75 | M | Alkali burn | 0.02 | 0.4 | 0.4 | 0.15 | 0.4 | 0.15 | 0.4 | 0.02 |
| 01-05 | 52 | F | SJS | 0.03 | 0.03 | 0.04 | 0.02 | 0.01 | 0.02 | 0.02 | 0.03 |
| 01-06 | 48 | M | Idiopathic | 0.01 | 0.01 | 0.01 | 0.01 | 0.01 | 0.15 | 0.15 | 0.01 |
| 01-07 | 42 | M | Alkali burn | 0.002 | 0.002 | 0.005 | 0.001 | 0.002 | 0.001 | 0.001 | 0.002 |
| 01-08 | 64 | F | SJS | 0.03 | 0.02 | 0.05 | 0.2 | 0.06 | 0.04 | 0.03 | 0.03 |
| 01-10 | 52 | M | Thermal burn | 0.002 | 0.002 | 0.002 | 0.002 | 0.002 | 0.04 | 0.15 | 0.002 |
| Tohoku University hospital | 02-01 | 36 | M | Alkali burn | 0.01 | 0.04 | 0.005 | 0.005 | 0.04 | 0.03 | 0.03 | 0.01 |
| 02-02 | 70 | F | SJS | 0.03 | 0.01 | 0.01 | 0.02 | 0.06 | 0.03 | 0.002 | 0.03 |
| 02-03 | 63 | F | Sjogren's syndrome | 0.001 | 0.001 | 0.001 | 0.001 | 0.001 | 0.001 | 0.001 | 0.001 |
| 02-04 | 52 | F | SJS | 0.08 | 0.15 | 0.09 | 0.15 | 0.2 | 0.04 | 0.4 | 0.08 |
| 02-05 | 48 | M | Alkali burn | 0.002 | 0.005 | 0.002 | 0.002 | 0.002 | 0.002 | 0.002 | 0.002 |
| 02-07 | 33 | M | Thermal burn | 0.002 | 0.01 | 0.01 | 0.02 | 0.02 | 0.02 | 0.01 | 0.002 |
| Tokyo University hospital | 03-01 | 53 | M | Acid burn | 0.03 | 0.04 | 0.03 | 0.02 | 0.02 | 0.5 | 0.3 | 0.03 |
| 03-03 | 78 | F | MMP | 0.01 | 0.07 | 0.03 | 0.01 | 0.03 | 0.06 | 0.05 | 0.01 |
| 03-04 | 45 | M | Alkali burn | 0.02 | 0.03 | 0.05 | 0.05 | 0.05 | 0.15 | 0.09 | 0.02 |
| 03-05 | 65 | F | SJS | 0.02 | 0.2 | 0.4 | 0.15 | 0.2 | 0.04 | 0.06 | 0.02 |
| Ehime University hospital | 04-01 | 45 | M | Alkali burn | 0.002 | 0.002 | 0.002 | 0.001 | 0.001 | 0.001 | 0.005 | 0.002 |
| 04-02 | 66 | M | Alkali burn | 0.04 | 0.005 | 0.02 | 0.04 | 0.05 | 0.5 | 0.7 | 0.04 |
| 04-03 | 59 | M | aniridia | 0.05 | 0.07 | 0.07 | 0.15 | 0.07 | 0.07 | 0.07 | 0.05 |
| 04-04 | 50 | M | GVHD | 0.04 | 0.09 | 0.05 | 0.5 | 0.02 | 0.01 | 0.01 | 0.04 |

MMP: mucous membrane ocular cicatricial pemphigoid, SJS: Stevens-Johnson syndrome,

**Supplemental Table5. Corneal opacification following cultivated oral mucosal epithelial transplantation**

| Institution | Patient | Age | Gender | Causative disease | Pre  operative | 2 weeks | 1 month | 3 months | 6 months | 1 year | 1 year  6 months | 2 years |
| --- | --- | --- | --- | --- | --- | --- | --- | --- | --- | --- | --- | --- |
| Osaka University | 01-02 | 80 | F | MMP | 2 | 0 | 0 | 0 | 1 | 1 | 1 | 1 |
| 01-03 | 36 | F | Idiopathic | 2 | 1 | 1 | 1 | 1 | 2 | 1 | 2 |
| 01-04 | 75 | M | Alkali burn | 2 | 1 | 0 | 1 | 1 | 1 | 1 | 1 |
| 01-05 | 52 | F | SJS | 2 | 1 | 1 | 1 | 1 | 1 | 1 | 2 |
| 01-06 | 48 | M | Idiopathic | 3 | 3 | 3 | 3 | 3 | 3 | 0 | 1 |
| 01-07 | 42 | M | Alkali burn | 3 | 2 | 2 | 3 | 3 | 2 | 1 | 1 |
| 01-08 | 64 | F | SJS | 2 | 1 | 1 | 1 | 1 | 1 | 1 | 1 |
| 01-10 | 52 | M | Thermal burn | 3 | 3 | 3 | 3 | 3 | 3 | 1 | 1 |
| Tohoku University hospital | 02-01 | 36 | M | Alkali burn | 2 | 1 | 1 | 1 | 1 | 1 | 1 | 1 |
| 02-02 | 70 | F | SJS | 2 | 2 | 1 | 1 | 1 | 1 | 1 | 1 |
| 02-03 | 63 | F | Sjogren's syndrome | 2 | 2 | 2 | 2 | 2 | 2 | 2 | 2 |
| 02-04 | 52 | F | SJS | 2 | 1 | 1 | 1 | 1 | 1 | 2 | 2 |
| 02-05 | 48 | M | Alkali burn | 3 | 3 | 3 | 3 | 3 | 3 | 3 | 3 |
| 02-07 | 33 | M | Thermal burn | 2 | 2 | 2 | 2 | 2 | 2 | 2 | 2 |
| Tokyo University hospital | 03-01 | 53 | M | Acid burn | 2 | 1 | 1 | 2 | 2 | 2 | 0 | 0 |
| 03-03 | 78 | F | MMP | 2 | 1 | 1 | 1 | 2 | 2 | 1 | 1 |
| 03-04 | 45 | M | Alkali burn | 2 | 1 | 1 | 1 | 2 | 2 | 0 | 1 |
| 03-05 | 65 | F | SJS | 1 | 1 | 1 | 1 | 1 | 1 | 1 | 1 |
| Ehime University hospital | 04-01 | 45 | M | Alkali burn | 3 | 2 | 2 | 2 | 2 | 2 | 2 | 0 |
| 04-02 | 66 | M | Alkali burn | 2 | 1 | 1 | 1 | 1 | 1 | 0 | 0 |
| 04-03 | 59 | M | aniridia | 2 | 0 | 0 | 0 | 0 | 0 | 0 | 0 |
| 04-04 | 50 | M | GVHD | 1 | 0 | 0 | 0 | 0 | 0 | 1 | 0 |

MMP: mucous membrane ocular cicatricial pemphigoid, SJS: Stevens-Johnson syndrome,

**Supplemental Table6. Corneal neovascularization following cultivated oral mucosal epithelial transplantation**

| Institution | Patient | Age | Gender | Causative disease | Pre  operative | 2 weeks | 1 month | 3 months | 6 months | 1 year | 1 year  6 months | 2 years |
| --- | --- | --- | --- | --- | --- | --- | --- | --- | --- | --- | --- | --- |
| Osaka University | 01-02 | 80 | F | MMP | 3 | 0 | 0 | 0 | 1 | 2 | 2 | 2 |
| 01-03 | 36 | F | Idiopathic | 3 | 1 | 1 | 2 | 3 | 3 | 3 | 3 |
| 01-04 | 75 | M | Alkali burn | 3 | 0 | 1 | 1 | 2 | 1 | 2 | 1 |
| 01-05 | 52 | F | SJS | 3 | 1 | 1 | 1 | 1 | 3 | 3 | 3 |
| 01-06 | 48 | M | Idiopathic | 3 | 1 | 2 | 2 | 2 | 2 | 1 | 2 |
| 01-07 | 42 | M | Alkali burn | 3 | 0 | 1 | 1 | 2 | 2 | 2 | 1 |
| 01-08 | 64 | F | SJS | 3 | 0 | 1 | 1 | 1 | 1 | 1 | 1 |
| 01-10 | 52 | M | Thermal burn | 3 | 0 | 1 | 2 | 2 | 3 | 2 | 2 |
| Tohoku University hospital | 02-01 | 36 | M | Alkali burn | 3 | 3 | 3 | 3 | 3 | 3 | 3 | 3 |
| 02-02 | 70 | F | SJS | 3 | 3 | 3 | 3 | 3 | 3 | 3 | 3 |
| 02-03 | 63 | F | Sjogren's syndrome | 3 | 1 | 1 | 1 | 1 | 1 | 2 | 2 |
| 02-04 | 52 | F | SJS | 2 | 2 | 1 | 1 | 1 | 1 | 1 | 1 |
| 02-05 | 48 | M | Alkali burn | 2 | 3 | 3 | 3 | 3 | 3 | 3 | 3 |
| 02-07 | 33 | M | Thermal burn | 3 | 3 | 3 | 3 | 3 | 3 | 3 | 3 |
| Tokyo University hospital | 03-01 | 53 | M | Acid burn | 2 | 1 | 1 | 1 | 1 | 1 | 1 | 0 |
| 03-03 | 78 | F | MMP | 2 | 0 | 0 | 0 | 1 | 1 | 1 | 1 |
| 03-04 | 45 | M | Alkali burn | 2 | 0 | 0 | 0 | 0 | 0 | 1 | 1 |
| 03-05 | 65 | F | SJS | 3 | 0 | 0 | 1 | 1 | 1 | 1 | 1 |
| Ehime University hospital | 04-01 | 45 | M | Alkali burn | 3 | 0 | 0 | 1 | 1 | 2 | 2 | 0 |
| 04-02 | 66 | M | Alkali burn | 3 | 0 | 0 | 0 | 0 | 0 | 0 | 0 |
| 04-03 | 59 | M | aniridia | 3 | 0 | 0 | 0 | 0 | 0 | 0 | 1 |
| 04-04 | 50 | M | GVHD | 2 | 0 | 0 | 0 | 0 | 1 | 1 | 2 |

MMP: mucous membrane ocular cicatricial pemphigoid, SJS: Stevens-Johnson syndrome,

**Supplementary Table7. Serious adverse events**

SOC PT eye relation treatment outcome

Eye disorders Cataract operated eye possibly related cataract surgery cured

investigations Intraocular pressure increased operated eye possibly related trabeculotomy cured

investigations Intraocular pressure increased fellow eye possibly related trabeculotomy remitted

Nervous system disorders Haemorrhage intracranial - not related preservation therapy cured

Eye disorders Corneal epithelial defect operated eye related AMT cured

AMT: amniotic membrane transplantation

**Supplementary table8. Adverse events**

SOC PT cases proportion(%)

Gastrointestinal disorders Nausea 2 9.1

Salivary gland cyst 1 4.5

Noninfective gingivitis 1 4.5

Abdominal pain 1 4.5

Constipation 2 9.1

Vomiting 1 4.5

Inguinal hernia 1 4.5

General disorders and administration site conditions Eye complication associated with device 9 40.9

(dropout of therapeutic soft contact lens)

Malaise 1 4.5

Localised oedema 1 4.5

Pyrexia 1 4.5

Fatigue 1 4.5

Infections and infestations Tracheitis 1 4.5

Upper respiratory tract infection 3 13.6

Otitis media 1 4.5

Nasopharyngitis 3 13.6

Rhinitis 1 4.5

Sinusitis 1 4.5

Eye disorders Macular oedema 1 4.5

Entropion 1 4.5

Optic disc haemorrhage 1 4.5

Cataract 4 18.2

Musculoskeletal and connective tissue disorders Back pain 1 4.5

Respiratory, thoracic and mediastinal disorders Oropharyngeal pain 1 4.5

Nasal inflammation 1 4.5

Ear and labyrinth disorders Ear pain 1 4.5

Injury, poisoning and procedural complications Lip injury 1 4.5

Procedural pain 2 9.1

Nervous system disorders Paraesthesia 2 9.1

Haemorrhage intracranial 1 4.5

Headache 1 4.5

Dizziness 1 4.5

Renal and urinary disorders Urethral haemorrhage 1 4.5

Psychiatric disorders Insomnia 2 9.1

Metabolism and nutrition disorders Hypoglycaemia 1 4.5

Diabetes mellitus 1 4.5

Skin and subcutaneous tissue disorders Acne 1 4.5

Immune system disorders Corneal graft rejection (following keratoplasty) 2 9.1

Investigations Aspartate aminotransferase increased 2 9.1

Alanine aminotransferase increased 3 13.6

Intraocular pressure increased 9 40.9

Eosinophil count increased 1 4.5

White blood cell count increased 1 4.

SOC: System Organ Class

PT: Preferred terms

**Supplementary References**

1. Deng SX, Borderie V, Chan CC et al: Global Consensus on Definition, Classification, Diagnosis, and Staging of Limbal Stem Cell Deficiency. *Cornea* 2019;38:364-375.

2. Sotozono C, Ang LP, Koizumi N et al: New grading system for the evaluation of chronic ocular manifestations in patients with Stevens-Johnson syndrome. *Ophthalmology* 2007;114:1294-1302.

3. Oie Y, Nishida K: Translational study on ocular surface reconstruction using oral mucosal epithelial cell sheets. *Cornea* 2014;33 Suppl 11:S47-52.

4. Oie Y, Nozaki T, Takayanagi H et al: Development of a cell sheet transportation technique for regenerative medicine. *Tissue engineering Part C, Methods* 2014;20:373-382.

5. Nishida K, Yamato M, Hayashida Y et al: Corneal reconstruction with tissue-engineered cell sheets composed of autologous oral mucosal epithelium. *The New England journal of medicine* 2004;351:1187-1196.

6. Oie Y, Sugita S, Yokokura S et al: Clinical Trial of Autologous Cultivated Limbal Epithelial Cell Sheet Transplantation for Patients with Limbal Stem Cell Deficiency. *Ophthalmology* 2023.
