# Supplementary material
Source: Research Square preprint supplement (doi:10.21203/rs.3.rs-7181420/v1)
Supplement: Supplementary file 9 [file f5867b595d61ec6f72502673.docx]

Statistical Analysis Plan

| Clinical trial title | Multicenter joint physician-led clinical trial using cultivated autologous oral mucosal epithelial cell sheet (COMET01) transplantation for patients with limbal stem cell deficiency |
| --- | --- |
| Protocol number | OUH-COMET01 |

| Prepared by | Japan Tissue Engineering Co., Ltd.  Clinical Development Department  Masashi Noguchi Yosuke Nakatsu |
| --- | --- |
| Preparation date | September 9, 2016 |
| Version | 1.0 |

| Person in charge of statistical analysis business support Checked by | Japan Tissue Engineering Co., Ltd.  Clinical Development Department  Masashi Noguchi  Confirmation date: September 9, 2016 (mm/dd/yyyy) |
| --- | --- |
| Person responsible for statistical analysis  Approved by | Department of Clinical Epidermiology and Biostatics, Osaka University Graduate School of Medicine  Ayumi Shintani  Confirmation date: September 12, 2016 (mm/dd/yyyy) |

| Confidentiality statement  This protocol contains confidential information of Japan Tissue Engineering. Disclosure of the information is limited to persons involved in this trial for conduct of the trial only.  Disclosure of the protocol to a third party without obtaining written approval from Ophthalmology, Department of Ophthalmology, Graduate School of Medicine, Osaka University the sponsor in advance is strictly prohibited, except for use to obtain informed consent from the subjects.  Patent application, manufacturing process, unpublished scientific data, and other information relating to COMET01 are proprietary confidential information of Osaka University. |
| --- |

Revision history

| Version | Preparation date | Prepared by | Reason of revision |
| --- | --- | --- | --- |
| 0.1 | October 27, 2015 | Yuya Otake Masashi Noguchi | Newly created |
| 1.0 | September 9, 2016 | Masashi Noguchi  Yosuke Nakatsu | Correcting mistakes and fixing |

Table of contents

[I. Summary of Statistical Analysis Plan 1](#_Toc135213941)

[1. Objectives 1](#_Toc135213942)

[2. Definitions of terms/abbreviations 1](#_Toc135213943)

[3. Outline of the protocol (excerpt) 4](#_Toc135213944)

[4. Outline of statistical analyses 8](#_Toc135213945)

[4.1. Outline 8](#_Toc135213946)

[4.2. Flow chart 12](#_Toc135213947)

[5. Patient/data handling 13](#_Toc135213948)

[5.1. Trial population 13](#_Toc135213949)

[5.1.1. Analysis set 13](#_Toc135213950)

[5.1.2. Population to be aggregated and output 13](#_Toc135213951)

[5.2. Handling of missing values 14](#_Toc135213952)

[5.3. Handling of evaluation values from multiple evaluators 14](#_Toc135213953)

[5.4. Scope of observation/test days 14](#_Toc135213954)

[5.5. Data derivation 15](#_Toc135213955)

[5.6. Categorization of continuous variables 17](#_Toc135213956)

[5.7. Definitions related to data output 17](#_Toc135213957)

[II. Details of Statistical Analysis Plan 20](#_Toc135213958)

[1. Status of clinical trial conduction 20](#_Toc135213959)

[1.1. Breakdown of patients 20](#_Toc135213960)

[1.2. Breakdown of discontinuation/dropout 21](#_Toc135213961)

[1.3. Deviation from the protocol 22](#_Toc135213962)

[2. Efficacy evaluation 23](#_Toc135213963)

[2.1. Analyzed dataset 23](#_Toc135213964)

[2.2. Demographic and other baseline characteristics 24](#_Toc135213965)

[2.3. Treatment status 25](#_Toc135213966)

[2.4. Concomitant drugs/therapies 26](#_Toc135213967)

[2.4.1. Concomitant drugs 26](#_Toc135213968)

[2.4.2. Concomitant therapies 26](#_Toc135213969)

[2.5. Efficacy endpoint analysis 27](#_Toc135213970)

[2.5.1. Success rate of corneal epithelium reconstruction in Post-transplant Week 52 (%) (primary efficacy endpoint) 27](#_Toc135213971)

[2.5.2. Limbal stem cell deficiency severity classification 28](#_Toc135213972)

[2.5.3. Subjective symptoms 30](#_Toc135213973)

[2.5.4. Variation of corrected visual acuity 31](#_Toc135213974)

[2.5.5. QOL evaluation 33](#_Toc135213975)

[2.5.6. Extent of corneal opacity 35](#_Toc135213976)

[2.5.7. Extent of corneal neovascularization 36](#_Toc135213977)

[2.5.8. Extent of symblepharon 37](#_Toc135213978)

[2.5.9. Applicability of additional treatments for visual improvement 38](#_Toc135213979)

[3. Safety evaluation 38](#_Toc135213980)

[3.1. Brief summary of adverse events 38](#_Toc135213981)

[3.2. Conversion of adverse events 39](#_Toc135213982)

[3.3. Important safety endpoints 39](#_Toc135213983)

[3.4. Important malfunctions 42](#_Toc135213984)

[3.5. Tabulation of ocular topical adverse events 43](#_Toc135213985)

[3.5.1. Causality of ocular topical adverse events 43](#_Toc135213986)

[3.5.2. Severity of ocular topical adverse events 44](#_Toc135213987)

[3.5.3. Seriousness of ocular topical adverse events 44](#_Toc135213988)

[3.5.4. Onset time of ocular topical adverse events 44](#_Toc135213989)

[3.6. Tabulation of non-ocular topical adverse events 45](#_Toc135213990)

[3.6.1. Causality of non-ocular topical adverse events 45](#_Toc135213991)

[3.6.2. Severity of non-ocular topical adverse events 45](#_Toc135213992)

[3.6.3. Seriousness of non-ocular topical adverse events 46](#_Toc135213993)

[3.6.4. Onset time of non-ocular topical adverse events 46](#_Toc135213994)

[3.7. Ocular topical adverse events for each stratification factor 47](#_Toc135213995)

[3.8. Non-ocular topical adverse events for each stratification factor 47](#_Toc135213996)

[3.9. Adverse event list 48](#_Toc135213997)

[3.10. Laboratory test 53](#_Toc135213998)

[3.11. Product malfunctions 54](#_Toc135213999)

[4. List of tables, listings, and figures 55](#_Toc135214000)

# Summary of Statistical Analysis Plan

## Objectives

| This plan document stipulates the details of the statistical analysis plan of “Multicenter joint physician-led clinical trial using cultivated autologous oral mucosal epithelial cell sheet (COMET01) transplantation for patients with limbal stem cell deficiency (protocol number: OUH-COMET01)” (hereinafter referred to as this trial).  The details of the statistical analyses based on the protocol are described in this document. |
| --- |

## Definitions of terms/abbreviations

| Term/abbreviation | Description/definition |
| --- | --- |
| CTCAE/JCOG | Common Terminology Criteria for Adverse Events  Japanese translation JCOG version |
| MedDRA/J | Medical Dictionary for Regulatory Activities Terminology/J  Japanese version of ICH Medical Dictionary for Regulatory Activities |
| LLT | Lowest Level Term of MedDRA/J |
| PT | Preferred Term of MedDRA/J |
| SOC | System Organ Class of MedDRA/J  With some exceptions, primary SOCs will be assigned on the basis of chief onset sites or organs. |
| ETDRS | Early Treatment Diabetic Retinopathy Study |
| LogMAR | Logarithm of Minimum Angle of Resolution |
| NEI VFQ-25 Japanese version | The 25-Item National Eye Institute Visual Function Questionnaire Japanese version |
| Limbal stem cell deficiency severity classification | Stage I: Conjunctivalization is absent in the central cornea (diameter 5 mm), and the limbus is in the following conditions.  A: Conjunctivalization: <50%  B: Conjunctivalization: ≥50% and <100%  C: Conjunctivalization: 100%  Stage II: Conjunctivalization is present in the central cornea (diameter 5 mm), and the limbus is in the following conditions.  A: Conjunctivalization: <50%  B: Conjunctivalization: ≥50% and <100%  Stage III: The corneal surface is entirely covered by conjunctival tissues. |
| Adverse event | Adverse events are any undesirable unintended signs (including abnormal laboratory values), symptoms, and diseases regardless of causal relationship with the investigational product.  In this trial, the events of Grade ≥1 in CTCAE v4.0, or a standard for judging the severity of adverse events, are defined as adverse events and will be collected. However, for ocular topical events, their severity will be evaluated on a 3-point scale (mild, moderate, and severe), and those evaluated as mild or more severe than mild is defined as adverse events and will be collected.  Moreover, the complications that occurred before consent acquisition and were aggravated during the trial period are also defined as adverse events and will be collected. |
| Malfunction | The adverse events whose causal relationship with the investigational product is judged as undeniable are defined as malfunctions. |
| Serious adverse event | Serious adverse events are defined as the adverse events meeting any of the following conditions.  Resulting in death  Life-threatening The term “life-threatening” here means the case in which the subject is in danger of death at the onset time of the concerned event, but it does not mean that the event might result in death if it were more serious.  Requiring hospitalization or prolongation of hospitalization for treatment  Resulting in persistent or marked disorder/dysfunction  Causing congenital abnormality or congenital defect  Other events and responses judged as medically important conditions The term “other events and responses judged as medically important conditions” here means the important medical events that possibly make the subjects in danger or require procedures or treatments not to result in the conditions listed in the definitions, even though they do not threaten lives or result in death or hospitalization right now. |
| Important malfunction | The following items, or the risks specific to cell/tissue processed products, will be investigated.  Onsets of neoplastic lesions in the transplantation sites of the investigational product with undeniable causal relationships with the investigational product  Onsets of allergic symptoms with undeniable causal relationships with the investigational product  Onsets of unknown infectious diseases of unknown causes with undeniable causal relationships with the investigational product |
| Important safety assessment items | The following items set as safety evaluation items in the clinical trial implementation plan shall be safety evaluation items that are more important than their significance and the peculiarity of handling.  [1] Superficial punctate keratopathy  [2] Corneal epithelial defect  [3] Corneal keratinization  [4] Conjunctival injection  [5] Infectious keratitis  [6] Endophthalmitis |
| Treatment period | From transplantation to Post-transplant Week 52 or the post-transplant discontinuation day |
| Observation period | From the consent acquisition day to right before transplantation or the pre-transplant discontinuation day |
| Completion | To reach Post-transplant Week 52 and finish the clinical trial |
| Evaluation completed | Means that limbal stem cell deficiency severity classification has been evaluated at each observation time point after transplantation of the investigational product |
| Evaluation uncompleted | Means that limbal stem cell deficiency severity classification has not been evaluated at each observation time point after transplantation of the investigational product |
| Summary statistics | Defined as the number of patients (or cases), mean, median, standard deviation, minimum, maximum, 25th percentile, and 75th percentile, unless otherwise specified |

## Outline of the protocol (excerpt)

| | Objectives of the trial  To confirm the efficacy and safety of autologous cultivated oral mucosal epithelial cell sheet COMET01 (hereinafter referred to as the investigational product) in patients diagnosed with limbal stem cell deficiency (LSCD). | | --- | | Disease studied  Limbal stem cell deficiency | | Inclusion criteria/exclusion criteria  Patients who satisfy all the inclusion criteria and none of exclusion criteria listed as follows are eligible for the trial: In addition, the investigational product is transplanted only in one eye. When bilateral eyes meet the transplantation criteria, the following items are referred to as the following items, and it is judged comprehensively after consulting with the patient:  ・ Visual acuity  ・ Corneal stromal opacity  ・ Cataract  ・ Tear fluid volume, etc.  Inclusion criteria  Patients diagnosed with LSCD classification Stage III.  Figure 1   | 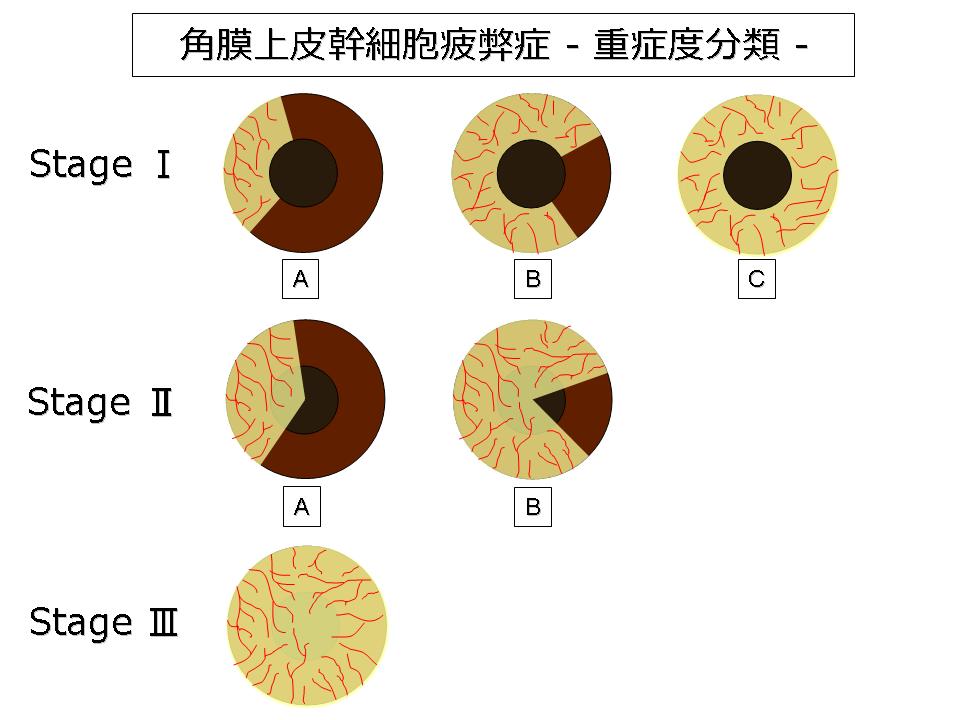 Stages of LSCD | Stage I: No conjunctivalization is present in the center of the cornea (diameter 5 mm), and the percentage of conjunctivalization in the corneal limbus is as follows: A: <50% B: ≥50% and <100% C: 100%  Stage II: Conjunctivalization is present in the center of the cornea (diameter 5 mm), and the percentage of conjunctivalization in the corneal limbus is as follows: A: <50% B: ≥50% and <100%  Stage III: The whole corneal surface is covered by conjunctival tissue. | | --- | --- |   Patients with clear scarring or inflammatory findings in the oral mucosa and has a site that can be collected.  Patients ≥20 years old at the time of informed consent  Exclusion criteria  Antibacterial drugs, corticosteroids, or anesthetic drugs used in the trial are contraindicated.  Hypersensitivity to antibiotics of penicillin, kanamycin, streptomycin, and amphotericin B, or history of hypersensitivity to penicillin antibiotics or aminoglycoside antibiotics  History of hypersensitivity to animals (cows, mice, or pigs)  History of malignant tumor within 5 years prior to screening, or currently suspected with malignant tumor  Glaucoma with poorly controlled intraocular pressure  Diabetes mellitus with poor glycemic control  Defect in central vision of the eye to which the investigational products is to be implanted (target eye).  Treatment-resistant, severe decrease in tear  Intraocular surgery is scheduled in the trial period.  Severe abnormality in eyelid of the target eye  Any concurrent medical condition in the target eye or the whole body which may interfere with proper evaluation of the trial treatment, in the opinion of the investigator or subinvestigator  Pregnant women, lactating women, women who are possibly pregnant, or women who want to be pregnant during the trial period  Patients who have participated in another clinical trial within 16 weeks prior to transplantation of the investigational product, who are participating in another clinical trial at transplantation of the investigational product, or who have a schedule to participate in another clinical study during participation in the present trial  Other patients who are not eligible for the trial, in the opinion of the investigator or subinvestigator | | Trial design  Multicenter, open-label, non-controlled trial | | Procedure and time of informed consent  Procedure  Written informed consent is obtained from patients themselves.  Time of informed consent  Before start of screening test/observation | | Concomitant drugs/therapies  For the drugs concomitantly used during the trial period, the name, administration route, and period and purpose of use are documented in the Case Report Form (CRF). For the therapies concomitantly used during the trial period, the name and period and purpose of use are documented in the CRF.  Prohibited concomitant drugs  Use of the following drugs in bilateral eyes is prohibited during the trial period, because they may interfere with evaluation of the trial treatment:  Non-steroidal anti-inflammatory eye drops  Drugs for glaucoma with potent effect to injure the epithelium: timolol maleate, betaxolol hydrochloride, and isopropyl unoprostone  Artificial tear-containing preservative  Prohibited concomitant therapies  Use of the following therapies in bilateral eyes is prohibited during the trial period, because they may interfere with evaluation of the trial treatment:  Corneal transplantation  Curettage of the conjunctival epithelium from the cornea  Amniotic membrane transplantation to the cornea  Instillation of autologous serum | | Non-proprietary name of the investigational products  Human autograft (autologous cultivated oral mucosal epithelial cell sheet) | | Items and time of test/observation  Tests/observation are performed according to the test/observation schedule, respectively. | | Endpoints  Efficacy  Primary endpoint:  Success rate of corneal epithelium reconstruction (%) at Week 52 after transplantation of the investigational products  Secondary endpoints:  Number of subjects by severity of LSCD at Week 52 after transplantation of the investigational products  Subjective symptoms  Corrected visual acuity  Evaluation of QOL  Severity of corneal opacity  Severity of corneal neovascularization  Severity of symblepharon  Whether additional treatment to improve visual acuity is indicated or not at Week 52 after transplantation of the clinical trial products or at trial discontinuation  Severity of LSCD, subjective symptoms, corrected vision, degree of corneal opacity, degree of corneal neovascularization and degree of eyelid adhesion in the fellow eye  Safety  Significant safety endpoints  Superficial punctate keratopathy: the number of subjects and incidence (%)  Corneal epithelial defect: the number of subjects and incidence (%)  Corneal keratinization: the number of subjects and incidence (%)  Conjunctival injection: the number of subjects and incidence (%)  Infectious keratitis: the number of subjects and incidence (%)  Endophthalmitis: the number of subjects and incidence (%)  Adverse events and malfunctions: the number of subjects and incidence (%)  Important malfunctions: the number of subjects and incidence (%) | | Planned sample size: 6 subjects  Sample size for efficacy analysis: 5 subjects | | Trial period  From July 15, 2015, to March 31, 2017 | | Good clinical practice (GCP) inspection  GCP inspection is applicable to this trial. | |
| --- | --- | --- | --- | --- | --- | --- | --- | --- | --- | --- | --- | --- | --- | --- |

## Outline of statistical analyses

### Outline

| Item | Outline |
| --- | --- |
| Positioning of statistical analyses | The Statistical Analysis Report prepared from the results of the statistical analyses performed based on this plan document will be a source document for the Clinical Study Report of this trial and the marketing approval application form. |
| Positioning of the fellow eye | Since the main evaluation items of efficacy of this trial are only for implanted eyes, the fellow eye is considered side-by-side.  Since the background of the fellow eye is targeted at the case where the background of the fellow eye is different from that of the target eye, the fellow eye is not a strict self-control, but only refers to the data and analysis results. |
| Tabulation of concomitant drugs | Tabulation will be conducted by using the first 3 digits (therapeutic category code) and 7 digits (non-proprietary name code) of the YJ code of Japan Pharmaceutical Information Center Ethical/Non-prescription Drug Formulary. |
| Tabulation of concomitant therapies | Tabulated by using LLT and PT of MedDRA/J.  However, for the therapies for which MedDRA/J code does not exist, the company-specific code issued by DM section will be used. |
| Handling of primary efficacy evaluation parameters | Unless otherwise specified, as the evaluation values of limbal stem cell deficiency severity classification, the values evaluated by the eligibility evaluation committee will be used for evaluation on the screening day, and the values evaluated by the response assessment committee will be used for evaluation on each observation time point after transplantation. |
| Analysis of the items related to primary efficacy endpoints | Success rate of corneal epithelium reconstruction at 52 weeks after transplantation of the investigational product (%)  Successful corneal epithelium reconstruction is defined as being rated as Stage I (Stage I A–C) on limbal stem cell deficiency severity classification at 52 weeks after transplantation of the investigational product. The success rate is defined as the ratio of patients with successful corneal epithelium reconstruction to the analysis set, and binomial test will be performed on the following hypotheses.  H0: π = 0.1  H1: π ≠ 0.1 |
| Analysis of the items related to secondary efficacy endpoints | The number of patients for each limbal stem cell deficiency severity class at 52 weeks after transplantation of the investigational product Severity at each observation time point will be cross tabulated against the screening day.  The severity is aggregated at each observation time.  Both target and fellow eyes are performed.  Subjective symptoms Severity at each observation time point will be shown in a line plot graphically and cross-tabulated against the screening day.  Both target and fellow eyes are performed  Corrected visual acuity.  Values measured using the Landolt ring chart  ... Converting decimal visual acuity into LogMAR and graphically showing its change from baseline (the value on the screening day) at each observation time point in a line plot, summary statistics will be calculated for each observation time point. Both target and fellow eyes are performed .  Values measured using the ETDRS chart  ... Graphically showing the temporal changes from baseline (the value measured at screening) at each observation time point in a line plot, summary statistics will be calculated for each observation time point. Both target and fellow eyes are performed.  In addition, for both measured values, patients will be tabulated for <2- and ≥2-point improvement.  Both target and fellow eyes are performed.  QOL evaluation The total scores on the screening day, in Post-transplant Week 52, and at the final evaluation time will be calculated, and summary statistics will be calculated.  Extent of corneal opacity Severity at each observation time point will be shown in a line plot graphically and cross-tabulated against the screening day.  Both target and fellow eyes are performed.  Extent of corneal neovascularization Severity at each observation time point will be shown in a line plot graphically and cross-tabulated against the screening day.  Both target and fellow eyes are performed.  Extent of symblepharon Severity at each observation time point will be shown in a line plot graphically and cross-tabulated against the screening day.  Both target and fellow eyes are performed.  Applicability of additional treatments for visual improvement The number and ratio of patients to whom it is applicable, inapplicable, or unnecessary will be calculated for each item. |
| Analysis on important safety endpoints | Superficial punctate keratopathy Severity at each observation time point will be shown in a line plot graphically and cross-tabulated against the screening day.  Both target and fellow eyes are performed.  Corneal epithelial defect Severity at each observation time point will be shown in a line plot graphically and cross-tabulated against the screening day.  Both target and fellow eyes are performed.  Corneal keratinization  Severity at each observation time point will be shown in a line plot graphically and cross-tabulated against the screening day.  Both target and fellow eyes are performed.  Conjunctival injection  Severity at each observation time point will be shown in a line plot graphically and cross-tabulated against the screening day.  Both target and fellow eyes are performed.  Infectious keratitis  Severity at each observation time point will be shown in a line plot graphically and cross-tabulated against the screening day.  Both target and fellow eyes are performed.  Endophthalmitis  Severity at each observation time point will be shown in a line plot graphically and cross-tabulated against the screening day.  Both target and fellow eyes are performed.  In addition, the events judged as aggravated to Grade ≥1 after the screening day will be handled as important adverse events. |
| Analysis on adverse events and malfunctions | By using PT and Primary SOC of MedDRA/J, the patients in whom adverse events occurred will be tabulated by onset time and the two-sided 95% confidence intervals of incidence rates (%) will be calculated. The patients in whom malfunctions occurred will be analyzed in the same manner by causality, severity, and seriousness, and the patients in whom adverse events occurred during the treatment period will be further analyzed in the same manner by onset time.  In addition, ocular topical adverse events and malfunctions will be handled separately from the other adverse events and malfunctions. |
| Analysis on important malfunctions | Onsets of neoplastic lesions in the transplantation sites of the investigational product with undeniable causal relationships with the investigational product The patients in whom the concerned events occurred during the entire treatment period will be tabulated by severity, and the two-sided 95% confidence intervals of incidence rates (%) will be calculated.  Onsets of allergic symptoms with undeniable causal relationships with the investigational product The patients in whom the concerned events occurred during the entire treatment period will be tabulated by severity, and the two-sided 95% confidence intervals of incidence rates (%) will be calculated.  Onsets of unknown infectious diseases of unknown causes with undeniable causal relationships with the investigational product The patients in whom the concerned events occurred during the entire treatment period will be tabulated by severity, and the two-sided 95% confidence intervals of incidence rates (%) will be calculated. |
| Significance level | Defined as two-sided 5%, unless otherwise specified |
| Confidence coefficient | Defined as two-sided 95%, unless otherwise specified |
| Confidence intervals of rates | Their two-sided confidence intervals will be exactly calculated using binomial distribution. |
| Adjustment for covariates | Not to be conducted in this trial |
| Interim analysis | Not to be conducted in this trial |
| Investigation on subpopulations | Data will be stratified by pre-selected variables, and exploratory investigation will be conducted. |
| Differences between trial sites | Not to be investigated because some trial sites have an extremely small number of patients, although this trial is multicenter clinical trial. |
| Multiplicity | Multiplicity will not be taken into account, because no multiplicity test is planned in this plan document. |

### Flow chart

| Tissue collection  Investigational product transplantation  Screening-ineligible patients  Patients with discontinuation in the treatment period  Consent acquisition  Screening (enrollment start)  Enrollment completion  Eligible  Ineligible  Dis-continuation  Patients with discontinuation before tissue collection in the observation period  Patients with discontinuation after tissue collection in the observation period  Eligibility judgment  Dis-continuation  Patients judged as ineligible  (Observation period)  (Treatment period)  (Patient enrollment)  Eligible  Ineligible |
| --- |

## Patient/data handling

### Trial population

#### Analysis set

| Population | Definition |
| --- | --- |
| Full Analysis Set (FAS) | Defined as the consent-acquired patients except for the following patients.  Patients with GCP non-compliance  Patients who did not undergo transplantation of the investigational product  Patients for whom efficacy endpoints have never been observed after transplantation of the investigational product  Major efficacy analysis set |
| Per Protocol Set (PPS: Analysis set in accordance with the protocol) | Defined as the patients of FAS except for the following patients.  Patients with missing primary endpoint values  Patients with non-compliance with inclusion/exclusion criteria  Patients with primary endpoint-related non-compliance with the protocol |
| Safety analysis set during the observation period (hereinafter referred to as Observation Period Safety) | Defined as the consent-acquired patients except for the following patients.  Patients with GCP non-compliance  Patients who did not undergo tissue collection  Patients for whom safety endpoints have never been observed |
| Safety analysis set during the treatment period (hereinafter referred to as Treatment Period Safety) | Defined as the patients of the Observation Period Safety analysis set except for the following patients.  Patients with GCP non-compliance  Patients who did not undergo transplantation of the investigational product  Patients for whom safety endpoints have never been observed after the transplantation of the investigational product |

#### Population to be aggregated and output

| Population | Definition |
| --- | --- |
| Consent-acquired patients | Patients from whom written consent was acquired and to whom enrollment code was provided |
| Enrollment-started patients | Patients for whom case report form was accepted and patient enrollment was started after the principal investigator or subinvestigators conducted patient enrollment eligibility survey (hereinafter referred to as screening) |
| Enrollment-completed patients | Patients for whom patient enrollment was completed after being judged as “eligible” in the eligibility test |

### Handling of missing values

| Missing values will not be complemented. |
| --- |

### Handling of evaluation values from multiple evaluators

| Item | Handling |
| --- | --- |
| Limbal stem cell deficiency severity classification | Although evaluation values occur from up to three evaluators, or the attending physician (the principal investigator or subinvestigator), eligibility judging committee, and effect judging committee, unless otherwise specified, the values evaluated by the eligibility judging committee will be used for evaluation on the screening day, and the values evaluated by the effect judging committee will be used for evaluation on each observation time point after transplantation. |

### Scope of observation/test days

| Date | Handling |
| --- | --- |
| Consent acquisition day, screening day, tissue collection day, transplantation day | 1 day |
| Post-transplant Week 2 | Within ±3 days from the specified day |
| Post-transplant Week 4 | Within ±3 days from the specified day |
| Post-transplant Week 12 | Within ±14 days from the specified day |
| Post-transplant Week 24 | Within ±14 days from the specified day |
| Post-transplant Week 52 | Within ±28 days from the specified day |
| Discontinuation day | Within +7 days from the discontinuation day |

### Data derivation

| Item | Derivation |
| --- | --- |
| Success rate of corneal epithelium reconstruction in Post-transplant Week 52 | Successful corneal epithelium reconstruction in the transplanted eye is defined as being rated as Stage I A–C on limbal stem cell deficiency severity classification at 52 weeks after transplantation of the investigational product. |
| QOL grade | The answer categories of each item will be converted into scores in accordance with the following rules.   | Item number | Original answer category | Score after conversion | | --- | --- | --- | | 1, 3, 4 | 1  2  3  4  5 | 100  75  50  25  0 | | 2 | 1  2  3  4  5  6 | 100  80  60  40  20  0 | | 15b-c | 1  2  3  4  5  6, 7 | 100  75  50  25  0  Missing value | | 5, 6, 7, 8, 9, 10, 11, 12, 13, 14, 16 | 1  2  3  4  5  6 | 100  75  50  25  0  Missing value | | 17, 18, 19, 20, 21, 22, 23, 24, 25 | 1  2  3  4  5 | 0  25  50  75  100 |   The score of each subscale will be obtained by calculating the mean score of each component item of the subscale in accordance with the following subscale classification. However, missing values will be excluded from the calculation of mean values. In addition, subscale scores will not be calculated for “general health” and “driving.”   | Subscale | Number of items | Item number | | --- | --- | --- | | General sense of well-being | 1 | 1 | | General vision | 1 | 2 | | Eye pain | 2 | 4, 19 | | Behavior depending on near vision | 3 | 5, 6, 7 | | Behavior depending on distant vision | 3 | 8, 9, 14 | | Social functioning depending on vision | 2 | 11, 13 | | Mental health depending on vision | 4 | 3, 21, 22, 25 | | Role functioning depending on vision | 2 | 17, 18 | | Self-sustainability depending on vision | 3 | 20, 23, 24 | | Driving | 2 | 15, 16 | | Color vision | 1 | 12 | | Peripheral vision | 1 | 10 |   QOL grades will be obtained by calculating the mean of the 10 subscales for which scores were obtained. |

### Categorization of continuous variables

| Item | Category |
| --- | --- |
| Age 1 (years) | 1: <20  2: ≥20 and <30  3: ≥30 and <40  4: ≥40 and <50  5: ≥50 and <60  6: ≥60 and <70  7: ≥70 and <80  8: ≥80 |
| Age 2 (years) (geriatrics) | 1: <65  2: ≥65 |
| Age 3 (years) | 1: <45  2: ≥45 |
| Direction of change in corrected vision | 1: Improved  2: Constant  3: Aggravated |
| Improvement rate of corrected visual acuity | 1: ≤−0.2  2: >−0.2 |
| Onset time of adverse events (treatment period) | The time to adverse event onset (days) will be classified in accordance with the following rules.  1 (from transplantation day to Week 2): ≥1 and <15  2 (from Week 3 to Week 4): ≥15 and <29  3 (from Week 5 to Week 12): ≥29 and <85  4 (from Week 13 to Week 24): ≥85 and <169  5 (from Week 25): ≥169 |

### Definitions related to data output

| Item | Definition |
| --- | --- |
| Age (years) | Value on the consent acquisition day |
| Time to transplantation (days) | Transplantation day − tissue collection day + 1 |
| Observation duration (days) | Transplantation day or pre-transplant discontinuation day − consent acquisition day |
| Treatment duration (days) | Post-transplant Week 52 or post-transplant discontinuation day − transplantation day + 1 |
| Time to discontinuation (days) | Discontinuation day − consent acquisition day + 1 |
| Time to adverse event onset (days) (treatment period) | Adverse event onset day − transplantation day + 1 |
| Time to adverse event onset (days) (observation period) | Adverse event onset day − consent acquisition day + 1 |
| Adverse event duration (days) | When outcome is recovery or remission: Outcome day − adverse event onset day + 1  Other outcomes: Missing value |
| Significant digits of laboratory values | | Test item | Unit | Significant digits (the number of decimal places) | | --- | --- | --- | | Red blood cell count | ×106/μL | 2 | | White blood cell count | ×103/μL | 1 | | Differential leukocyte count_Neutrophil | % | 1 | | Differential leukocyte count_Eosinophil | % | 1 | | Differential leukocyte count_Basophil | % | 1 | | Differential leukocyte count_Lymphocyte | % | 1 | | Hemoglobin | g/dL | 1 | | Hematocrit | % | 1 | | Platelet count | ×104/μL | 1 | | AST (GOT) | U/L | 0 | | ALT (GPT) | U/L | 0 | | Serum total protein | g/dL | 1 | | Serum creatinine | mg/dL | 2 | | C-reactive protein (CRP) | mg/dL | 2 | |
| Significant digits of statistics | Mean, median, 25th percentile, and 75th percentile: The number of the significant digits of actual measurement values + 1  Standard deviation: The number of the significant digits of actual measurement values + 2  Minimum, maximum: The number of the significant digits of actual measurement values  Confidence limits: The number of the significant digits of actual measurement values + 1  Ratios: Up to 1 decimal place in percent figures  Test statistics and p-values: Up to 4 decimal places |

# Details of Statistical Analysis Plan

## Status of clinical trial conduction

### Breakdown of patients

| Trial population | Consent-acquired patients, enrollment-started patients, screening-eligible patients, enrollment-completed patients, transplanted patients, ineligible patients |
| --- | --- |

| Item | Description |
| --- | --- |
| Breakdown of patients (Table 1.1.1) | - For cases that have obtained consent, the registered start cases and the non-registered cases are summarized. - For enrollment-started patients, screening-eligible patients and screening-ineligible patients will be tabulated. - As for screening-eligible patients, patients judged as eligible (enrollment-completed patients) and patients judged as ineligible will be tabulated. - As for enrollment-completed patients (patients judged as eligible), patients who discontinued before tissue collection and discontinued after tissue collection will be tabulated. - As for transplanted patients, evaluation-completed patients and evaluation-uncompleted patients in Post-transplant Weeks 2, 4, 12, 24, and 52 will be tabulated. Furthermore, as for evaluation-uncompleted patients, the number of patients will be tabulated by reason for uncompletion of evaluation. |
| Patient list (Listing 1.1.1) | The following items will be shown in order of the enrollment code.   - Enrollment code - Name of trial site/department, sexuality, and age (years) - Pregnancy test results (screening date/transplant date) Transplantation-planned /transplanted eye Transplantation plan at screening date/ Severity classification of LSCD in the implanted eye (evaluation of the effect determination committee, evaluation of the qualification committee, doctor evaluation in charge) - Inclusion in/exclusion from populations: FAS, PPS, Observation Period Safety, and Treatment Period Safety |
| Breakdown of ineligible patients (Table 1.1.2) | - For enrollment-started patients, eligible patients and ineligible patients will be tabulated. - As for ineligible patients, the number of patients will be tabulated by reason for ineligibility. |
| List of ineligible patients (Listing 1.1.2) | The following items will be shown in order of the enrollment code.   - Enrollment code - Reason for ineligibility |

### Breakdown of discontinuation/dropout

| Trial population | Consent-acquired patients, enrollment-completed patients, and transplanted patients |
| --- | --- |

| Item | Description |
| --- | --- |
| Breakdown of discontinuation (Table 1.2.1) | - For consent-acquired patients, patients who discontinued before enrollment completion will be tabulated by reason for discontinuation. - As for enrollment-completed patients, patients who discontinued before and after tissue collection in the observation period will be tabulated by reason for discontinuation. - As for transplanted patients, patients who discontinued in the treatment period will be tabulated by reason for discontinuation. |
| Breakdown of discontinuation/dropout by trial site (before enrollment completion in the observation period) (Table 1.2.2.1)  Breakdown of discontinuation/dropout by trial site (after enrollment completion in the observation period) (Table 1.2.2.2)  Breakdown of discontinuation/dropout by trial site (treatment period) (Table 1.2.2.3) | - For consent-acquired patients, patients who discontinued before enrollment completion in the observation period will be tabulated by trial site and reason. - As for enrollment-completed patients, patients who discontinued before and after tissue collection in the observation period will be tabulated by trial site and reason. - As for transplanted patients, patients who discontinued in the treatment period will be tabulated by trial site and reason. |
| List of patients who discontinued (before enrollment completion in the observation period) (Listing 1.2.1)  List of patients who discontinued (after enrollment completion in the observation period) (Listing 1.2.2)  List of patients who discontinued (treatment period) (Listing 1.2.3) | The following items will be shown in order of the enrollment code.   - Enrollment code - Reason for discontinuation |

### Deviation from the protocol

| Trial population | Consent-acquired patients and transplanted patients |
| --- | --- |

| Item | Description |
| --- | --- |
| Deviation from the protocol by trial site (observation period) (Table 1.3.1.1)  Deviation from the protocol by trial site (treatment period) (Table 1.3.1.2) | - For consent-acquired patients, patients with deviation in the observation period will be tabulated by trial site and deviation item. - As for transplanted patients, patients with deviation in the treatment period will be tabulated by trial site and deviation item. |
| Handling of deviation from the protocol (observation period) (Table 1.3.2.1)  Handling of deviation from the protocol (treatment period) (Table 1.3.2.2) | - Inclusion/exclusion of each deviation item in the observation period will be shown with tabulation of the concerned patients. - Inclusion/exclusion of each deviation item in the treatment period will be shown with tabulation of the concerned patients. |
| List of patients with deviation from the protocol (observation period) (Listing 1.3.1)  List of patients with deviation from the protocol (treatment period) (Listing 1.3.2) | The following items will be shown in order of the enrollment code.   - Enrollment code - Deviation item |

## Efficacy evaluation

### Analyzed dataset

| Trial population | Consent-acquired patients, transplanted patients, and FAS |
| --- | --- |

| Item | Description |
| --- | --- |
| Inclusion in/exclusion from the analysis set (Table 2.1) | Inclusion in/exclusion from each analysis set will be tabulated. Patients excluded from each analysis set will be tabulated by reason for exclusion. |
| List of patients excluded from FAS (Listing 2.1.1)  List of patients excluded from PPS (Listing 2.1.2)  List of patients excluded from Observation Period Safety (Listing 2.1.3)  List of patients excluded from Treatment Period Safety (Listing 2.1.4) | The following items will be shown in order of the enrollment code.   - Enrollment code - Reason for exclusion |

### Demographic and other baseline characteristics

| Trial population | FAS, PPS, Observation Period Safety, Treatment Period Safety, and consent-acquired patients |
| --- | --- |

| Item | Description |
| --- | --- |
| Demographic and other baseline characteristics (Table 2.2) | The following items will be tabulated by category, and ratios will be calculated. For continuous data, summary statistics will be calculated.   - Sexuality - Age (years: categories 1, 2, and 3; summary statistics) - Name of causative injury or disease - Transplantation-planned/transplanted eye - Fellow eye - Presence of ocular complication (transplantation-planned/transplanted eye, fellow eye, bilateral eyes) - Presence of non-ocular complication - Presence of past ocular disease (transplantation-planned/transplanted eye, fellow eye, bilateral eyes) - Presence of past non-ocular disease - Presence of a history of ocular surgery (transplantation-planned/transplanted eye, fellow eye, bilateral eyes) |
| List of patient backgrounds (Listing 2.2.1) | The following items will be shown in order of the enrollment code.   - Enrollment code - Sexuality - Age - Name of causative injury or disease - Transplantation-planned/transplanted eye - Fellow eye - Presence of ocular complication - Presence of non-ocular complication - Presence of past ocular disease - Presence of past non-ocular disease - Presence of a history of ocular surgery |
| List of complications (Listing 2.2.2) | The following items will be shown in order of the enrollment code.   - Enrollment code - Name of complication - Onset site - Severity/Grade |
| List of past diseases (Listing 2.2.3) | The following items will be shown in order of the enrollment code.   - Enrollment code - Name of past disease - Onset site |
| List of ocular surgery histories (Listing 2.2.4) | The following items will be shown in order of the enrollment code.   - Enrollment code - History of ocular surgery - Surgery site |

### Treatment status

| Trial population | FAS, PPS, Observation Period Safety, Treatment Period Safety, and enrollment-completed patients |
| --- | --- |

| Item | Description |
| --- | --- |
| Conduction status (duration) (Table 2.3) | For the following items, summary statistics will be calculated.   - Time to transplantation (days) - Observation duration (days) - Treatment duration (days) |
| List of conduction status (Listing 2.3) | The following items will be shown in order of the enrollment code.   - Enrollment code - Transplantation day - Time to transplantation (days) - Observation duration (days) - Treatment duration (days) |

### Concomitant drugs/therapies

#### Concomitant drugs

| Trial population | Consent-acquired patients, FAS, PPS, Observation Period Safety, and Treatment Period Safety |
| --- | --- |

| Item | Description |
| --- | --- |
| Conversion list of concomitant drugs (Table 2.4.1.1) | The therapeutic categories, non-proprietary names, and brand names of concomitant drugs will be displayed. |
| Concomitant drug (after tissue collection in the observation period) (Table 2.4.1.2)  Concomitant drug (treatment period) (Table 2.4.1.3) | - For concomitant drugs after tissue collection in the observation period, patients using them will be tabulated by therapeutic category and non-proprietary name. - For concomitant drugs in the treatment period, patients using them will be tabulated by therapeutic category and non-proprietary name. |
| List of concomitant drugs (before tissue collection in the observation period) (Listing 2.4.1.1)  List of concomitant drugs (after tissue collection in the observation period) (Listing 2.4.1.2)  List of concomitant drugs (treatment period) (Listing 2.4.1.3) | The following items will be shown in order of the enrollment code.   - Enrollment code - Concomitant drug: therapeutic category, non-proprietary name, brand name, dosing route, concomitant use site, concomitant use start date, concomitant use end date, and the purpose of concomitant use |

#### Concomitant therapies

| Trial population | Consent-acquired patients, FAS, PPS, Observation Period Safety, and Treatment Period Safety |
| --- | --- |

| Item | Description |
| --- | --- |
| Conversion list of concomitant therapies (Table 2.4.2.1) | PTs, LLTs, and concomitant therapy names will be displayed.  However, for company-specific codes, their decodes will be output with a prefix “o-” to differentiate them from MedDRA codes. |
| Concomitant therapy (after tissue collection in the observation period) (Table 2.4.2.2)  Concomitant therapy (treatment period) (Table 2.4.2.3) | - For concomitant therapies after tissue collection in the observation period, patients receiving them will be tabulated by PT and LLT. - For concomitant therapies in the treatment period, patients receiving them will be tabulated by PT and LLT.   However, for company-specific codes, their decodes will be output with a prefix “o-” to differentiate them from MedDRA codes. |
| List of concomitant therapies (before tissue collection in the observation period) (Listing 2.4.2.1)  List of concomitant therapies (after tissue collection in the observation period) (Listing 2.4.2.2)  List of concomitant therapies (treatment period) (Listing 2.4.2.3) | The following items will be shown in order of the enrollment code.   - Enrollment code - Concomitant therapy: PT, LLT, therapy name, concomitant treatment site, concomitant treatment start date, concomitant treatment end date, and the purpose of concomitant treatment   However, for company-specific codes, their decodes will be output with a prefix “o-” to differentiate them from MedDRA codes. |

### Efficacy endpoint analysis

#### Success rate of corneal epithelium reconstruction in Post-transplant Week 52 (%) (primary efficacy endpoint)

| Trial population | FAS and PPS |
| --- | --- |

| Item | Description |
| --- | --- |
| Success rate of corneal epithelium reconstruction in Post-transplant Week 52 (%) (FAS) (primary efficacy endpoint) (Table 2.5.1.1) | - The success rate of corneal epithelium reconstruction in Post-transplant Week 52 (%) and its confidence interval will be calculated. - Binomial test will be performed on the following hypotheses. H0: π = 0.1 H1: π ≠ 0.1 |
| Success rate of corneal epithelium reconstruction in Post-transplant Week 52 (%) (evaluation by the investigator) (FAS) (Table 2.5.1.2) | The success rate of corneal epithelium reconstruction evaluated by the investigator in Post-transplant Week 52 (%) and its confidence interval will be calculated. |
| Success rate of corneal epithelium reconstruction in Post-transplant Week 52 (%) (PPS) (Table 2.5.1.3) | The success rate of corneal epithelium reconstruction in Post-transplant Week 52 (%) and its confidence interval will be calculated. |
| Success rate of corneal epithelium reconstruction in Post-transplant Week 52 (%) (evaluation by the investigator) (PPS) (Table 2.5.1.4) | The success rate of corneal epithelium reconstruction evaluated by the investigator in Post-transplant Week 52 (%) and its confidence interval will be calculated. |

#### Limbal stem cell deficiency severity classification

| Trial population | FAS, PPS, and enrollment-completed patients |
| --- | --- |

| Item | Description |
| --- | --- |
| Limbal stem cell deficiency severity classification by evaluation time point (FAS) (Table 2.5.2.1) | - Limbal stem cell deficiency severity classification evaluated by the response assessment committee will be tabulated by evaluation time point (screening day; Post-transplant Weeks 2, 4, 12, 24, and 52; and the discontinuation day). - Both transplanted and fellow eyes will be tabulated.   When limbal stem cell deficiency severity classification was not evaluated at an individual evaluation time point, it will be counted as unknown. |
| Limbal stem cell deficiency severity classification by evaluation time point (evaluation by the investigator) (FAS) (Table 2.5.2.2) | - Limbal stem cell deficiency severity classification evaluated by the investigator will be tabulated by evaluation time point (screening day; Post-transplant Weeks 2, 4, 12, 24, and 52; and the discontinuation day). - Both transplanted and fellow eyes will be tabulated.   When limbal stem cell deficiency severity classification was not evaluated at an individual evaluation time point, it will be counted as unknown. |
| Limbal stem cell deficiency severity classification by evaluation time point (PPS) (Table 2.5.2.3) | - Limbal stem cell deficiency severity classification evaluated by the response assessment committee will be tabulated by evaluation time point (screening day; Post-transplant Weeks 2, 4, 12, 24, and 52; and the discontinuation day). - Both transplanted and fellow eyes will be tabulated.   When limbal stem cell deficiency severity classification was not evaluated at an individual evaluation time point, it will be counted as unknown. |
| Limbal stem cell deficiency severity classification by evaluation time point (evaluation by the investigator) (PPS) (Table 2.5.2.4) | - Limbal stem cell deficiency severity classification evaluated by the investigator will be tabulated by evaluation time point (screening day; Post-transplant Weeks 2, 4, 12, 24, and 52; and the discontinuation day). - Both transplanted and fellow eyes will be tabulated.   When limbal stem cell deficiency severity classification was not evaluated at an individual evaluation time point, it will be counted as unknown. |
| Cross table of limbal stem cell deficiency severity classification by two evaluation subjects for the screening day and Post-transplant Week 52 (Table 2.5.2.5) | - Regarding the severity classification of LSCD, the response assessment committee evaluation and the investigator evaluation will be cross tabulated at the evaluation time (screening date, transplantation 2, 4, 12, 24, 52 weeks×, discontinuation date).   Does not distinguish between transplanted and fellow eyes and is used for tabulation. |
| List of limbal stem cell deficiency severity classification (Listing 2.5.2) | The following items will be shown in order of the enrollment code.   - Enrollment code - Inclusion in/exclusion from populations: FAS, PPS, Observation Period Safety, and Treatment Period Safety - Evaluation time points (the screening day; Post-transplant Weeks 2, 4, 12, 24, and 52; and the discontinuation day) - Evaluation day and time from the transplantation day (days) - Limbal stem cell deficiency severity classification in transplantation-planed/transplanted eye (evaluation by the response assessment committee, [the screening day only], and investigator) - Severity classification of LSCD in the fellow eye (evaluation by the response assessment committee and investigator) |

#### Subjective symptoms

| Trial population | FAS, PPS, and enrollment-completed patients |
| --- | --- |

| Item | Description |
| --- | --- |
| Cross table of subjective symptoms by time point (FAS) (Table 2.5.3.1)  Cross table of subjective symptoms by time point (PPS) (Table 2.5.3.2) | - The severity of subjective symptoms will be cross tabulated for the screening day and Post-transplant Week 2, 4, 12, 24, or 52 or the discontinuation day. - Both transplanted and fellow eyes will be tabulated. |
| Longitudinal change in subjective symptoms for each patient  (Figure2.5.3.1~2.5.3.6) | - Severity of subjective symptoms in transplantation planed/transplanted eye (eye pain, foreign body sensation, lacrimation, photophobia, dry sensation, and discomfort) from the baseline will be plotted separately from the transplanted eye and the fellow eye for each observation time point (Post-transplant Weeks 2, 4, 12, 24, and 52), and a line plot will be graphically shown for each patient. - As for the cancellation date, there is no line, only the batting line is done. |
| List of subjective symptoms (Listing 2.5.3) | The following items will be shown in order of the enrollment code.   - Enrollment code - Inclusion in/exclusion from populations: FAS, PPS, Observation Period Safety, and Treatment Period Safety - Evaluation time points (the screening day; Post-transplant Weeks 2, 4, 12, 24, and 52; and the discontinuation day) - Evaluation day and time from the transplantation day (days) - Severity of subjective symptoms in transplantation planed/transplanted eye (eye pain, foreign body sensation, lacrimation, photophobia, dry sensation, and discomfort) - Severity of subjective symptoms in fellow eye (eye pain, foreign body sensation, lacrimation, photophobia, dry sensation, and discomfort) |

#### Variation of corrected visual acuity

| Trial population | FAS, PPS, and enrollment-completed patients |
| --- | --- |

| Item | Description |
| --- | --- |
| Variation of corrected visual acuity (Landolt ring) by time point (FAS) (Table 2.5.4.1)  Variation of corrected visual acuity (Landolt ring) by time point (PPS) (Table 2.5.4.2) | - Regarding the variation of LogMAR-converted corrected decimal visual acuity at each observation time point (Post-transplant Weeks 2, 4, 12, 24, and 52 and the discontinuation day) from baseline, summary statistics will be calculated. - Both transplanted and fellow eyes will be calculated. |
| Longitudinal change in the variation of corrected visual acuity (Landolt ring) for each patient  (Figure 2.5.4.1) | - The variation of LogMAR-converted corrected decimal visual acuity from baseline will be plotted separately from the transplanted eye and the fellow eye for each observation time point (Post-transplant Weeks 2, 4, 12, 24, and 52), and a line plot will be graphically shown for each patient. - As for the cancellation date, there is no line, only the batting line is done. |
| Variation of corrected visual acuity (ETDRS) by time point (FAS) (Table 2.5.4.3)  Variation of corrected visual acuity (ETDRS) by time point (PPS) (Table 2.5.4.4) | - Regarding the variation of corrected visual acuity at each observation time point (Post-transplant Weeks 2, 4, 12, 24, and 52 and the discontinuation day) from baseline, summary statistics will be calculated. - Both transplanted and fellow eyes will be calculated. |
| Longitudinal change of the variation of corrected visual acuity (ETDRS) for each patient  (Figure 2.5.4.3) | - The variation of corrected visual acuity from baseline will be plotted separately from the transplanted eye and the fellow eye for each observation time point (Post-transplant Weeks 2, 4, 12, 24, and 52), and a line plot will be graphically shown for each patient. - As for the cancellation date, there is no line, only the batting line is done. |
| Direction of change in corrected visual acuity (Landolt ring) (FAS) (Table 2.5.4.5)  Direction of change in corrected visual acuity (Landolt ring) (PPS) (Table 2.5.4.6) | - Regarding the direction of change in LogMAR-converted corrected visual acuity at each observation time point (Post-transplant Weeks 2, 4, 12, 24, and 52 and the discontinuation day) from baseline, patients will be tabulated by category. - Both transplanted and fellow eyes will be tabulated. |
| Direction of change in corrected visual acuity (ETDRS) (FAS) (Table 2.5.4.7)  Direction of change in corrected visual acuity (ETDRS) (PPS) (Table 2.5.4.8) | - Regarding the direction of change in corrected visual acuity at each observation time point (Post-transplant Weeks 2, 4, 12, 24, and 52 and the discontinuation day) from baseline, patients will be tabulated by category. - Both transplanted and fellow eyes will be tabulated. |
| Improvement rate of corrected visual acuity (Landolt ring) (FAS) (Table 2.5.4.9)  Improvement rate of corrected visual acuity (Landolt ring) (PPS) (Table 2.5.4.10) | - Regarding the change in LogMAR-converted corrected decimal visual acuity at each observation time point (Post-transplant Weeks 2, 4, 12, 24, and 52 and the discontinuation day) from baseline, patients will be tabulated by category. - Both transplanted and fellow eyes will be tabulated. |
| Improvement rate of corrected visual acuity (ETDRS) (FAS) (Table 2.5.4.11)  Improvement rate of corrected visual acuity (ETDRS) (PPS) (Table 2.5.4.12) | - Regarding the change in corrected visual acuity at each observation time point (Post-transplant Weeks 2, 4, 12, 24, and 52 and the discontinuation day) from baseline, patients will be tabulated by category. - Both transplanted and fellow eyes will be tabulated. |
| List of corrected visual acuity (Listing 2.5.4) | The following items will be shown in order of the enrollment code.   - Enrollment code - Inclusion in/exclusion from populations: FAS, PPS, Observation Period Safety, and Treatment Period Safety - Evaluation time points (the screening day; Post-transplant Weeks 2, 4, 12, 24, and 52; and the discontinuation day) - Evaluation day and time from the transplantation day (days) - Landolt ring in transplantation planed/transplanted eye: corrected decimal visual acuity, LogMAR-converted corrected decimal visual acuity (the screening day; Post-transplant Weeks 2, 4, 12, 24, and 52; and the discontinuation day) - ETDRS in transplantation planed/transplanted eye: corrected visual acuity (the screening day; Post-transplant Weeks 2, 4, 12, 24, and 52; and the discontinuation day) - Landolt ring in fellow eye: corrected decimal visual acuity, LogMAR-converted corrected decimal visual acuity (the screening day; Post-transplant Weeks 2, 4, 12, 24, and 52; and the discontinuation day) - ETDRS in fellow eye: corrected visual acuity (the screening day; Post-transplant Weeks 2, 4, 12, 24, and 52; and the discontinuation day)   * For LogMAR-converted visual acuity in and after Post-transplant Week 2, its variation from baseline will also be displayed. |

#### QOL evaluation

| Trial population | FAS, PPS, and enrollment-completed patients |
| --- | --- |

| Item | Description |
| --- | --- |
| QOL evaluation (FAS) (Table 2.5.5.1)  QOL evaluation (PPS) (Table 2.5.5.2) | For QOL grades on the screening day, in Post-transplant Week 52, and at the final evaluation time, summary statistics will be calculated. |
| List of QOL evaluation (Listing 2.5.5) | The following items will be shown in order of the enrollment code.   - Enrollment code - Inclusion in/exclusion from populations: FAS, PPS, Observation Period Safety, and Treatment Period Safety - Evaluation time points (the screening day, Post-transplant Week 52, and the discontinuation day) - Evaluation day and time from the transplantation day (days) - Score (for each question; subscale total)   General sense of well-being: Question 1  General vision: Question 2; subscale total  Eye pain: Questions 4 and 19; subscale total  Behavior depending on near vision: Questions 5, 6, and 7; subscale total  Behavior depending on distant vision: Questions 8, 9, and 14; subscale total  Social functioning depending on vision: Questions 11 and 13; subscale total  Mental health depending on vision: Questions 3, 21, 22, and 25; subscale total  Role limitation depending on vision: Questions 17 and 18; subscale total  Self-sustainability depending on vision: Questions 20, 23, and 24; subscale total  Driving: Questions 15b, 15c, and 16  Color vision: Question 12; subscale total  Peripheral vision: Question 10; subscale total   - QOL grade   * “General health” and “driving” will be excluded from calculation of subscale total and QOL grade. |

#### Extent of corneal opacity

| Trial population | FAS, PPS, and enrollment-completed patients |
| --- | --- |

| Item | Description |
| --- | --- |
| Cross table of the extent of corneal opacity by time point (FAS) (Table 2.5.6.1)  Cross table of the extent of corneal opacity by time point (PPS) (Table 2.5.6.2) | - The extent of corneal opacity will be cross tabulated for the screening day and Post-transplant Week 2, 4, 12, 24, or 52 or the discontinuation day. - Both transplanted and fellow eyes will be tabulated. |
| Longitudinal change in the extent of corneal opacity for each patient  (Figure 2.5.6) | - The severity of corneal opacity will be plotted for each observation time point (the screening day and Post-transplant Weeks 2, 4, 12, 24, and 52), and a line plot will be graphically shown for each patient by connecting the plotted points. - As for the cancellation date, there is no line, only the batting line is done. |
| List of the extent of corneal opacity (Listing 2.5.6) | The following items will be shown in order of the enrollment code.   - Enrollment code - Inclusion in/exclusion from populations: FAS, PPS, Observation Period Safety, and Treatment Period Safety - Evaluation time points (the screening day; Post-transplant Weeks 2, 4, 12, 24, and 52; and the discontinuation day) - Evaluation day, time from the transplantation day (days) - Severity of corneal opacity in transplantation planed/transplanted eye - Severity of corneal opacity in fellow eye |

#### Extent of corneal neovascularization

| Trial population | FAS, PPS, and enrollment-completed patients |
| --- | --- |

| Item | Description |
| --- | --- |
| Cross table of the extent of corneal neovascularization by time point (FAS) (Table 2.5.7.1)  Cross table of the extent of corneal neovascularization by time point (PPS) (Table 2.5.7.2) | - The extent of corneal neovascularization will be cross tabulated for the screening day and Post-transplant Week 2, 4, 12, 24, or 52 or the discontinuation day. - Both transplanted and fellow eyes will be tabulated. |
| Longitudinal change in the extent of corneal neovascularization for each patient  (Figure 2.5.7) | - The severity of corneal neovascularization will be plotted for each observation time point (the screening day and Post-transplant Weeks 2, 4, 12, 24, and 52), and a line plot will be graphically shown for each patient by connecting the plotted points. - As for the cancellation date, there is no line, only the batting line is done. |
| List of the extent of corneal neovascularization (Listing 2.5.7) | The following items will be shown in order of the enrollment code.   - Enrollment code - Inclusion in/exclusion from populations: FAS, PPS, Observation Period Safety, and Treatment Period Safety - Evaluation time points (the screening day; Post-transplant Weeks 2, 4, 12, 24, and 52; and the discontinuation day) - Evaluation day and time from the transplantation day (days) - Severity of corneal neovascularization in transplantation planed/transplanted eye - Severity of corneal neovascularization in fellow eye |

#### Extent of symblepharon

| Trial population | FAS, PPS, and enrollment-completed patients |
| --- | --- |

| Item | Description |
| --- | --- |
| Cross table of the extent of symblepharon by time point (FAS) (Table 2.5.8.1)  Cross table of the extent of symblepharon by time point (PPS) (Table 2.5.8.2) | - The extent of symblepharon will be cross tabulated for the screening day and Post-transplant Week 2, 4, 12, 24, or 52 or the discontinuation day. - Both transplanted and fellow eyes will be tabulated |
| Longitudinal change in the extent of symblepharon for each patient  (Figure 2.5.8) | - The severity of symblepharon will be plotted for each observation time point (the screening day and Post-transplant Weeks 2, 4, 12, 24, and 52), and a line plot will be graphically shown for each patient by connecting the plotted points. - As for the cancellation date, there is no line, only the batting line is done |
| List of the extent of symblepharon (Listing 2.5.8) | The following items will be shown in order of the enrollment code.   - Enrollment code - Inclusion in/exclusion from populations: FAS, PPS, Observation Period Safety, and Treatment Period Safety - Evaluation time points (the screening day; Post-transplant Weeks 2, 4, 12, 24, and 52; and the discontinuation day) - Evaluation day and time from the transplantation day (days) - Severity of symblepharon in transplantation planed/transplanted eye - Severity of symblepharon in fellow eye |

#### Applicability of additional treatments for visual improvement

| Trial population | FAS and PPS |
| --- | --- |

| Item | Description |
| --- | --- |
| Applicability of additional treatments for visual improvement (FAS) (Table 2.5.9.1)  Applicability of additional treatments for visual improvement (PPS) (Table 2.5.9.2) | - For corneal transplantation and corneal conjunctival epithelium curettage for corneal stromal opacity removal, the patients for whom they are applicable, inapplicable, or unnecessary will be tabulated. - As for additional treatments other than those described above, the patients for whom they are applicable or inapplicable will be tabulated. |
| List of the applicability of additional treatments for visual improvement (Listing 2.5.9) | The following items will be shown in order of the enrollment code.   - Enrollment code - Additional treatments for visual improvement - Feasibility (applicable, inapplicable, or unnecessary) |

## Safety evaluation

Adverse events will be tabulated by using Primary SOC and PT encoded with MedDRA/J.

### Brief summary of adverse events

| Trial population | Observation Period Safety and Treatment Period Safety |
| --- | --- |

| Item | Description |
| --- | --- |
| Brief summary of adverse events (after tissue collection in the observation period) (Table 3.1.1)  Brief summary of adverse events (treatment period) (Table 3.1.2) | For the following items, the number of patients and cases with onsets will be tabulated by causality, and the confidence intervals of incidence rates will be calculated.   - Adverse events - Ocular topical adverse events - Non-ocular topical adverse events - Serious adverse events - Adverse events resulting in discontinuation   However, for adverse events in the observation period, those occurring after tissue collection will be included. |

### Conversion of adverse events

| Trial population | Consent-acquired patients |
| --- | --- |

| Conversion list of adverse events (Table 3.2) | - Primary SOCs, PTs, LLTs, and adverse event names will be displayed. |
| --- | --- |

### Important safety endpoints

| Trial population | Treatment Period Safety, Observation Period Safety, and consent-acquired patients |
| --- | --- |

| Item | Description |
| --- | --- |
| Incidence of superficial punctate keratopathy (Table 3.3.1.1) | For the nadir of superficial punctate keratopathy in the entire treatment period, the following procedures will be conducted separately from the transplanted eye and the fellow eye.   - To tabulate patients by severity - To tabulate patients of Grade ≥1 and calculate the confidence interval of the incidence rate - To tabulate patients of Grade ≥3 and calculate the confidence interval of the incidence rate |
| Cross table of superficial punctate keratopathy by time point (Table 3.3.1.2) | - The severity of superficial punctate keratopathy will be cross tabulated for the screening day and Post-transplant Week 2, 4, 12, 24, or 52 or the discontinuation day. - Both transplanted and fellow eyes will be tabulated |
| Longitudinal change in superficial punctate keratopathy for each patient (Figure 3.3.1) | - The severity of superficial punctate keratopathy will be plotted for each evaluation time point (Post-transplant Weeks 2, 4, 12, 24, and 52), and a line plot will be graphically shown for each patient by connecting the plotted points. - As for the cancellation date, there is no line, only the batting line is done |
| Incidence of corneal epithelial defect (Table 3.3.2.1) | For the nadir of corneal epithelial defect in the entire treatment period, the following procedures will be conducted.   - To tabulate patients by severity - To tabulate patients of Grade ≥1 and calculate the confidence interval of the incidence rate - To tabulate patients of Grade ≥3 and calculate the confidence interval of the incidence rate |
| Cross table of corneal epithelial defect by time point (Table 3.3.2.2) | The severity of corneal epithelial defect will be cross tabulated for the screening day and Post-transplant Week 2, 4, 12, 24, or 52 or the discontinuation day. |
| Longitudinal change in corneal epithelial defect for each patient (Figure 3.3.2) | The severity of corneal epithelial defect will be plotted for each evaluation time point (Post-transplant Weeks 2, 4, 12, 24, and 52), and a line plot will be graphically shown for each patient by connecting the plotted points. |
| Incidence of corneal keratinization (Table 3.3.3.1) | For the nadir of corneal keratinization in the entire treatment period, the following procedures will be conducted separately from the transplanted eye and the fellow eye.   - To tabulate patients by severity - To tabulate patients of Grade ≥1 and calculate the confidence interval of the incidence rate - To tabulate patients of Grade ≥3 and calculate the confidence interval of the incidence rate |
| Cross table of corneal keratinization by time point (Table 3.3.3.2) | - The severity of corneal keratinization will be cross tabulated for the screening day and Post-transplant Week 2, 4, 12, 24, or 52 or the discontinuation day. - Both transplanted and fellow eyes will be tabulated |
| Longitudinal change in corneal keratinization for each patient (Figure 3.3.3) | - The severity of corneal keratinization will be plotted for each evaluation time point (Post-transplant Weeks 2, 4, 12, 24, and 52), and a line plot will be graphically shown for each patient by connecting the plotted points. - As for the cancellation date, there is no line, only the batting line is done |
| Incidence of Conjunctival injection (Table 3.3.4.1) | For the nadir of Conjunctival injection in the entire treatment period, the following procedures will be conducted separately from the transplanted eye and the fellow eye.   - To tabulate patients by severity - To tabulate patients of Grade ≥1 and calculate the confidence interval of the incidence rate - To tabulate patients of Grade ≥3 and calculate the confidence interval of the incidence rate |
| Cross table of Conjunctival injection by time point (Table 3.3.4.2) | - The severity of Conjunctival injection will be cross tabulated for the screening day and Post-transplant Week 2, 4, 12, 24, or 52 or the discontinuation day. - Both transplanted and fellow eyes will be tabulated |
| Longitudinal change in Conjunctival injection for each patient (Figure 3.3.4) | - The severity of Conjunctival injection will be plotted for each evaluation time point (Post-transplant Weeks 2, 4, 12, 24, and 52), and a line plot will be graphically shown for each patient by connecting the plotted points. - As for the cancellation date, there is no line, only the batting line is done |
| Incidence of infectious keratitis (Table 3.3.5.1) | For the nadir of infectious keratitis in the entire treatment period, the following procedures will be conducted separately from the transplanted eye and the fellow eye.   - To tabulate patients by severity - To tabulate patients of Grade ≥1 and calculate the confidence interval of the incidence rate - To tabulate patients of Grade ≥3 and calculate the confidence interval of the incidence rate |
| Cross table of infectious keratitis by time point (Table 3.3.5.2) | - The severity of infectious keratitis will be cross tabulated for the screening day and Post-transplant Week 2, 4, 12, 24, or 52 or the discontinuation day. - Both transplanted and fellow eyes will be tabulated |
| Longitudinal change in infectious keratitis for each patient (Figure 3.3.5) | - The severity of infectious keratitis will be plotted for each evaluation time point (Post-transplant Weeks 2, 4, 12, 24, and 52), and a line plot will be graphically shown for each patient by connecting the plotted points. - As for the cancellation date, there is no line, only the batting line is done |
| Incidence of endophthalmitis (Table 3.3.6.1) | For the nadir of endophthalmitis in the entire treatment period, the following procedures will be conducted separately from the transplanted eye and the fellow eye.   - To tabulate patients by severity - To tabulate patients of Grade ≥1 and calculate the confidence interval of the incidence rate - To tabulate patients of Grade ≥3 and calculate the confidence interval of the incidence rate |
| Cross table of endophthalmitis by time point (Table 3.3.6.2) | - The severity of endophthalmitis will be cross tabulated for the screening day and Post-transplant Week 2, 4, 12, 24, or 52 or the discontinuation day. - Both transplanted and fellow eyes will be tabulated |
| Longitudinal change in endophthalmitis for each patient (Figure 3.3.6) | - The severity of endophthalmitis will be plotted for each evaluation time point (Post-transplant Weeks 2, 4, 12, 24, and 52), and a line plot will be graphically shown for each patient by connecting the plotted points. - As for the cancellation date, there is no line, only the batting line is done |
| List of important safety assessment items (Listing 3.3) | For important safety assessment items, the following items will be shown in order of the enrollment code.   - Enrollment code - Inclusion in/exclusion from populations: FAS, PPS, Observation Period Safety, and Treatment Period Safety - Evaluation time points (the screening day; Post-transplant Weeks 2, 4, 12, 24, and 52; and the discontinuation day) - Evaluation day and time from the transplantation day (days) - Severity (superficial punctate keratopathy/corneal epithelial defect) - Important safety endpoints for the planned transplantation/transplanted eye (pointy surface corneal disease, corneal epithelial defect, corneal keratinization, conjunctival hyperemia, corneal infection, endophthalmitis) - Important safety endpoints for the fellow eye (pointy surface corneal disease, corneal epithelial defect, corneal keratinization, conjunctival hyperemia, corneal infection, endophthalmitis) |

### Important malfunctions

| Trial population | Treatment Period Safety |
| --- | --- |

| Item | Description |
| --- | --- |
| Important malfunctions (Table 3.4.1) | The patients in whom important malfunctions occurred will be tabulated, and the confidence interval of incidence rate will be calculated. |
| Onset time of important malfunctions (Table 3.4.2) | The patients for whom important malfunctions are judged as “present” will be tabulated by evaluation time point (Post-transplant Weeks 2, 4, 12, 24, and 52 and post-transplant discontinuation day). |
| List of important malfunctions (neoplastic lesions) (Listing 3.4.1)  List of important malfunctions (allergic symptoms) (Listing 3.4.2)  List of important malfunctions (unknown infectious diseases) (Listing 3.4.3) | For the important malfunctions (1)–(3), the following items will be shown in order of the enrollment code.   - Enrollment code - Onset site (tissue-collected eye, transplanted eye, both eyes, and other than the eyes) - Adverse event number - Adverse event name - Adverse event PT - Onset date - Time to adverse event onset (days) - Severity - Seriousness - Outcome date (outcome) - Adverse event duration (days) - Causality (tissue collection/investigational product) - Reason of causality judgment - Treatments, courses, etc. |

### Tabulation of ocular topical adverse events

#### Causality of ocular topical adverse events

| Trial population | Observation Period Safety and Treatment Period Safety |
| --- | --- |

| Item | Description |
| --- | --- |
| Causality of ocular topical adverse events (after tissue collection in the observation period) (Table 3.5.1.1)  Causality of ocular topical adverse events (treatment period) (Table 3.5.1.2) | Patients in whom ocular topical adverse events occurred will be tabulated by Primary SOC and PT for each of the following categories, and the confidence intervals of incidence rates will be calculated.   - Causality: undeniable - Causality: undeniable + deniable   Causality will be classified on the basis of the causal relationship with tissue collection for adverse events in the observation period and with the investigational product for adverse events in the treatment period.  However, for adverse events in the observation period, those occurring after tissue collection will be included. |

#### Severity of ocular topical adverse events

| Trial population | Observation Period Safety and Treatment Period Safety |
| --- | --- |

| Item | Description |
| --- | --- |
| Severity of ocular topical adverse events (after tissue collection in the observation period) (Table 3.5.2.1)  Severity of ocular topical adverse events (treatment period) (Table 3.5.2.2) | Patients in whom ocular topical adverse events occurred will be tabulated by Primary SOC and PT for each severity level.  However, for adverse events in the observation period, those occurring after tissue collection will be included. |

#### Seriousness of ocular topical adverse events

| Trial population | Observation Period Safety and Treatment Period Safety |
| --- | --- |

| Item | Description |
| --- | --- |
| Seriousness of ocular topical adverse events (after tissue collection in the observation period) (Table 3.5.3.1)  Seriousness of ocular topical adverse events (treatment period) (Table 3.5.3.2) | Patients in whom ocular topical adverse events occurred will be tabulated by Primary SOC and PT for each seriousness level.  However, for adverse events in the observation period, those occurring after tissue collection will be included. |

#### Onset time of ocular topical adverse events

| Trial population | Treatment Period Safety |
| --- | --- |

| Item | Description |
| --- | --- |
| Onset time of ocular topical adverse events (treatment period) (Table 3.5.4.1) | Patients in whom ocular topical adverse events occurred will be tabulated by Primary SOC and PT for each of the onset time categories. |
| Onset time of ocular topical malfunctions (Table 3.5.4.2) | Patients in whom ocular topical malfunctions occurred will be tabulated by Primary SOC and PT for each of the onset time categories. |

### Tabulation of non-ocular topical adverse events

#### Causality of non-ocular topical adverse events

| Trial population | Observation Period Safety and Treatment Period Safety |
| --- | --- |

| Item | Description |
| --- | --- |
| Causality of non-ocular topical adverse events (after tissue collection in the observation period) (Table 3.6.1.1)  Causality of non-ocular topical adverse events (treatment period) (Table 3.6.1.2) | The number of patients in whom non-ocular topical adverse events occurred will be tabulated by Primary SOC and PT for each of the following categories, and the incidence rates and their confidence intervals will be calculated.   - Causality: undeniable - Causality: undeniable + deniable   Causality will be classified based on the causal relationship with tissue collection for adverse events in the observation period and with the investigational product for adverse events in the treatment period.  However, for adverse events in the observation period, those occurring after tissue collection will be included. |

#### Severity of non-ocular topical adverse events

| Trial population | Observation Period Safety and Treatment Period Safety |
| --- | --- |

| Item | Description |
| --- | --- |
| Severity of non-ocular topical adverse events (after tissue collection in the observation period) (Table 3.6.2.1)  Severity of non-ocular topical adverse events (treatment period) (Table 3.6.2.2) | Patients in whom non-ocular topical adverse events occurred will be tabulated by Primary SOC and PT for each severity level.  However, for adverse events in the observation period, those occurring after tissue collection will be included. |

#### Seriousness of non-ocular topical adverse events

| Trial population | Observation Period Safety and Treatment Period Safety |
| --- | --- |

| Item | Description |
| --- | --- |
| Seriousness of non-ocular topical adverse events (after tissue collection in the observation period) (Table 3.6.3.1)  Seriousness of non-ocular topical adverse events (treatment period) (Table 3.6.3.2) | Patients in whom non-ocular topical adverse events occurred will be tabulated by Primary SOC and PT for each seriousness level.  However, for adverse events in the observation period, those occurring after tissue collection will be included. |

#### Onset time of non-ocular topical adverse events

| Trial population | Treatment Period Safety |
| --- | --- |

| Item | Description |
| --- | --- |
| Onset time of non-ocular topical adverse events (treatment period) (Table 3.6.4.1) | Patients in whom non-ocular topical adverse events occurred will be tabulated by Primary SOC and PT for each of the onset time categories. |
| Onset time of non-ocular topical malfunctions (Table 3.6.4.2) | Patients in whom non-ocular topical malfunctions occurred will be tabulated by Primary SOC and PT for each of the onset time categories. |

### Ocular topical adverse events for each stratification factor

| Trial population | Treatment Period Safety |
| --- | --- |

| Item | Description |
| --- | --- |
| Ocular topical adverse events for each stratification factor (treatment period) (Table 3.7.1) | The patients in whom ocular topical adverse events occurred will be tabulated for each of the following stratification factors, and the incidence rate and its confidence interval will be calculated.   - Age (years) (category 3) - Sexuality - Causative injury or disease (chemical injury/burn and other than chemical injury/burn) - Presence of ocular complication - Presence of a history of ocular surgery |
| Ocular topical malfunctions for each stratification factor (Table 3.7.2) | The patients in whom ocular topical malfunctions occurred will be tabulated for each of the following stratification factors, and the incidence rate and its confidence interval will be calculated.   - Age (years) (category 3) - Sexuality - Causative injury or disease (chemical injury/burn and other than chemical injury/burn) - Presence of ocular complication - Presence of a history of ocular surgery |

### Non-ocular topical adverse events for each stratification factor

| Trial population | Treatment Period Safety |
| --- | --- |

| Item | Description |
| --- | --- |
| Non-ocular topical adverse events for each stratification factor (treatment period) (Table 3.8.1) | The patients in whom non-ocular topical adverse events occurred will be tabulated for each of the following stratification factors, and the incidence rate and its confidence interval will be calculated.   - Age (years) (category 3) - Sexuality - Causative injury or disease (chemical injury/burn and other than chemical injury/burn) - Presence of ocular complication - Presence of a history of ocular surgery |
| Non-ocular topical malfunctions for each stratification factor (Table 3.8.2) | The patients in whom non-ocular topical malfunctions occurred will be tabulated for each of the following stratification factors, and the incidence rate and its confidence interval will be calculated.   - Age (years) (category 3) - Sexuality - Causative injury or disease (chemical injury/burn and other than chemical injury/burn) - Presence of ocular complication - Presence of a history of ocular surgery |

### Adverse event list

| Trial population | Consent-acquired patients, Observation Period Safety, and Treatment Period Safety |
| --- | --- |

| Item | Description |
| --- | --- |
| List of patients with adverse events (before tissue collection in the observation period) (Listing 3.9.1) | For the patients in whom adverse events occurred before tissue collection in the observation period, the following items related to those adverse events will be shown in order of the enrollment code.   - Enrollment code - Onset site (transplanted eye, fellow eye, both eyes, and other than the eyes) - Adverse event number - Adverse event name - Adverse event PT - Onset date - Time to adverse event onset (days) - Severity - Seriousness - Outcome date (outcome) - Adverse event duration (days) - Causality (tissue collection/investigational product) - Reason for causality judgment - Treatments, courses, etc. |
| List of patients with adverse events (after tissue collection in the observation period) (Listing 3.9.2) | For the patients in whom adverse events occurred after tissue collection in the observation period, the following items related to those adverse events will be shown in order of the enrollment code.   - Enrollment code - Onset site (transplanted eye, opposite eye, both eyes, and other than the eyes) - Adverse event number - Adverse event name - Adverse event PT - Onset date - Time to adverse event onset (days) - Severity - Seriousness - Outcome date (outcome) - Adverse event duration (days) - Causality (tissue collection/investigational product) - Reason for causality judgment - Treatments, courses, etc. |
| List of patients with adverse events (treatment period) (Listing 3.9.3) | For the patients in whom adverse events occurred in the treatment period, the following items related to those adverse events will be shown in order of the enrollment code.   - Enrollment code - Onset site (transplanted eye, opposite eye, both eyes, and other than the eyes) - Adverse event number - Adverse event name - Adverse event PT - Onset date - Time to adverse event onset (days) - Severity - Seriousness - Outcome date (outcome) - Adverse event duration (days) - Causality (tissue collection/investigational product) - Reason for causality judgment - Treatments, courses, etc. |
| List of patients with deaths and other serious adverse events (before tissue collection in the observation period) (Listing 3.9.4) | For the patients in whom deaths and other serious adverse events occurred before tissue collection in the observation period, the following items related to those adverse events will be shown in order of the enrollment code.   - Enrollment code - Onset site (transplanted eye, opposite eye, both eyes, and other than the eyes) - Adverse event number - Adverse event name - Adverse event PT - Onset date - Time to adverse event onset (days) - Severity - Seriousness - Outcome date (outcome) - Adverse event duration (days) - Causality (tissue collection/investigational product) - Reason for causality judgment - Treatments, courses, etc. |
| List of patients with deaths and other serious adverse events (after tissue collection in the observation period) (Listing 3.9.5) | For the patients in whom deaths and other serious adverse events occurred after tissue collection in the observation period, the following items related to those adverse events will be shown in order of the enrollment code.   - Enrollment code - Onset site (transplanted eye, opposite eye, both eyes, and other than the eyes) - Adverse event number - Adverse event name - Adverse event PT - Onset date - Time to adverse event onset (days) - Severity - Seriousness - Outcome date (outcome) - Adverse event duration (days) - Causality (tissue collection/investigational product) - Reason for causality judgment - Treatments, courses, etc. |
| List of patients with deaths and other serious adverse events (treatment period) (Listing 3.9.6) | For the patients in whom deaths and other serious adverse events occurred in the treatment period, the following items related to those adverse events will be shown in order of the enrollment code.   - Enrollment code - Onset site (transplanted eye, opposite eye, both eyes, and other than the eyes) - Adverse event number - Adverse event name - Adverse event PT - Onset date - Time to adverse event onset (days) - Severity - Seriousness - Outcome date (outcome) - Adverse event duration (days) - Causality (tissue collection/investigational product) - Reason for causality judgment - Treatments, courses, etc. |
| List of patients with adverse events resulting in discontinuation (before tissue collection in the observation period) (Listing 3.9.7) | For the patients in whom adverse events resulting in discontinuation occurred before tissue collection in the observation period, the following items related to those adverse events will be shown in order of the enrollment code.   - Enrollment code - Onset site (transplanted eye, opposite eye, both eyes, and other than the eyes) - Adverse event number - Adverse event name - Adverse event PT - Onset date - Time to adverse event onset (days) - Severity - Seriousness - Outcome date (outcome) - Adverse event duration (days) - Causality (tissue collection/investigational product) - Reason for causality judgment - Treatments, courses, etc. |
| List of patients with adverse events resulting in discontinuation (after tissue collection in the observation period) (Listing 3.9.8) | For the patients in whom adverse events resulting in discontinuation occurred after tissue collection in the observation period, the following items related to those adverse events will be shown in order of the enrollment code.   - Enrollment code - Onset site (transplanted eye, opposite eye, both eyes, and other than the eyes) - Adverse event number - Adverse event name - Adverse event PT - Onset date - Time to adverse event onset (days) - Severity - Seriousness - Outcome date (outcome) - Adverse event duration (days) - Causality (tissue collection/investigational product) - Reason for causality judgment - Treatments, courses, etc. |
| List of patients with adverse events resulting in discontinuation (treatment period) (Listing 3.9.9) | For the patients in whom adverse events resulting in discontinuation occurred in the treatment period, the following items related to those adverse events will be shown in order of the enrollment code.   - Enrollment code - Onset site (transplanted eye, opposite eye, both eyes, and other than the eyes) - Adverse event number - Adverse event name - Adverse event PT - Onset date - Time to adverse event onset (days) - Severity - Seriousness - Outcome date (outcome) - Adverse event duration (days) - Causality (tissue collection/investigational product) - Reason for causality judgment - Treatments, courses, etc. |

### Laboratory test

| Trial population | Treatment Period Safety and consent-acquired patients |
| --- | --- |

| Item | Description |
| --- | --- |
| Shift table of laboratory values (Table 3.10) | For every laboratory test item, low/normal/high values will be cross tabulated for the screening day and transplantation day (for tests after transplantation), Post-transplant Week 52, or the discontinuation day in the treatment period. |
| List of laboratory values (Listing 3.10) | The following items will be shown in order of the enrollment code.   - Enrollment code - Test time points (the screening day, the transplantation day [for tests after transplantation], Post-transplant Week 52, and the discontinuation day) - Laboratory values:   Hematological test: Red blood cell count, white blood cell count, differential leukocyte count (neutrophil, eosinophil, basophil, and lymphocyte), hemoglobin, hematocrit, and platelet count  Blood biochemical test: AST (GOT), ALT (GPT), serum total protein, and serum creatinine  Immunoserological test: CRP |

### Product malfunctions

| Trial population | Enrollment-completed patients |
| --- | --- |

| Item | Description |
| --- | --- |
| List of product malfunctions (Listing 3.11) | The following items will be shown in order of the enrollment code.   - Enrollment code - Product malfunction number - Product malfunction name - Product with product malfunction - Type of product malfunction - Onset date - Presence of onsets of adverse events (adverse event number) - Seriousness - Comment |

## List of tables, listings, and figures

| Table/listing/ figure number | Title |
| --- | --- |
| Efficacy |  |
| Table 1.1.1 | Breakdown of patients |
| Table 1.1.2 | Breakdown of ineligible patients |
| Table 1.2.1 | Breakdown of discontinuation |
| Table 1.2.2.1 | Breakdown of discontinuation/dropout by trial site (before enrollment completion in the observation period) |
| Table 1.2.2.2 | Breakdown of discontinuation/dropout by trial site (after enrollment completion in the observation period) |
| Table 1.2.2.3 | Breakdown of discontinuation/dropout by trial site (treatment period) |
| Table 1.3.1.1 | Deviation from the protocol by trial site (observation period) |
| Table 1.3.1.2 | Deviation from the protocol by trial site (treatment period) |
| Table 1.3.2.1 | Handling of deviation from the protocol (observation period) |
| Table 1.3.2.2 | Handling of deviation from the protocol (treatment period) |
| Table 2.1 | Inclusion in/exclusion from the analysis set |
| Table 2.2 | Demographic and other baseline characteristics |
| Table 2.3 | Conduction status (duration) |
| Table 2.4.1.1 | Conversion list of concomitant drugs |
| Table 2.4.1.2 | Concomitant drug (after tissue collection in the observation period) |
| Table 2.4.1.3 | Concomitant drug (treatment period) |
| Table 2.4.2.1 | Conversion list of concomitant therapies |
| Table 2.4.2.2 | Concomitant therapy (after tissue collection in the observation period) |
| Table 2.4.2.3 | Concomitant therapy (treatment period) |
| Table 2.5.1.1 | Success rate of corneal epithelium reconstruction in Post-transplant Week 52 (%) (FAS) (primary efficacy endpoint) |
| Table 2.5.1.2 | Success rate of corneal epithelium reconstruction in Post-transplant Week 52 (%) (evaluation by the investigator) (FAS) |
| Table 2.5.1.3 | Success rate of corneal epithelium reconstruction in Post-transplant Week 52 (%) (PPS) |
| Table 2.5.1.4 | Success rate of corneal epithelium reconstruction in Post-transplant Week 52 (%) (evaluation by the investigator) (PPS) |
| Table 2.5.2.1 | Limbal stem cell deficiency severity classification by evaluation time point (FAS) |
| Table 2.5.2.2 | Limbal stem cell deficiency severity classification by evaluation time point (evaluation by the investigator) (FAS) |
| Table 2.5.2.3 | Limbal stem cell deficiency severity classification by evaluation time point (PPS) |
| Table 2.5.2.4 | Limbal stem cell deficiency severity classification by evaluation time point (evaluation by the investigator) (PPS) |
| Table 2.5.2.5 | Cross table of limbal stem cell deficiency severity classification by two evaluation subjects for the screening day and Post-transplant Week 52 |
| Table 2.5.3.1 | Cross table of subjective symptoms by time point (FAS) |
| Table 2.5.3.2 | Cross table of subjective symptoms by time point (PPS) |
| Table 2.5.4.1 | Variation of corrected visual acuity (Landolt ring) by time point (FAS) |
| Table 2.5.4.2 | Variation of corrected visual acuity (Landolt ring) by time point (PPS) |
| Table 2.5.4.3 | Variation of corrected visual acuity (ETDRS) by time point (FAS) |
| Table 2.5.4.4 | Variation of corrected visual acuity (ETDRS) by time point (PPS) |
| Table 2.5.4.5 | Direction of change in corrected visual acuity (Landolt ring) (FAS) |
| Table 2.5.4.6 | Direction of change in corrected visual acuity (Landolt ring) (PPS) |
| Table 2.5.4.7 | Direction of change in corrected visual acuity (ETDRS) (FAS) |
| Table 2.5.4.8 | Direction of change in corrected visual acuity (ETDRS) (PPS) |
| Table 2.5.4.9 | Improvement rate of corrected visual acuity (Landolt ring) (FAS) |
| Table 2.5.4.10 | Improvement rate of corrected visual acuity (Landolt ring) (PPS) |
| Table 2.5.4.11 | Improvement rate of corrected visual acuity (ETDRS) (FAS) |
| Table 2.5.4.12 | Improvement rate of corrected visual acuity (ETDRS) (PPS) |
| Table 2.5.5.1 | QOL evaluation (FAS) |
| Table 2.5.5.2 | QOL evaluation (PPS) |
| Table 2.5.6.1 | Cross table of the extent of corneal opacity by time point (FAS) |
| Table 2.5.6.2 | Cross table of the extent of corneal opacity by time point (PPS) |
| Table 2.5.7.1 | Cross table of the extent of corneal neovascularization by time point (FAS) |
| Table 2.5.7.2 | Cross table of the extent of corneal neovascularization by time point (PPS) |
| Table 2.5.8.1 | Cross table of the extent of symblepharon by time point (FAS) |
| Table 2.5.8.2 | Cross table of the extent of symblepharon by time point (PPS) |
| Table 2.5.9.1 | Applicability of additional treatments for visual improvement (FAS) |
| Table 2.5.9.2 | Applicability of additional treatments for visual improvement (PPS) |
| Safety |  |
| Table 3.1.1 | Brief summary of adverse events (after tissue collection in the observation period) |
| Table 3.1.2 | Brief summary of adverse events (treatment period) |
| Table 3.2 | Conversion list of adverse events |
| Table 3.3.1.1 | Incidence of superficial punctate keratopathy |
| Table 3.3.1.2 | Cross table of superficial punctate keratopathy by time point |
| Table 3.3.2.1 | Incidence of corneal epithelial defect |
| Table 3.3.2.2 | Cross table of corneal epithelial defect by time point |
| Table 3.3.3.1 | Incidence of corneal keratinization |
| Table 3.3.3.2 | Cross table of corneal keratinization by time point |
| Table 3.3.4.1 | Incidence of Conjunctival injection |
| Table 3.3.4.2 | Cross table of Conjunctival injection by time point |
| Table 3.3.5.1 | Incidence of infectious keratitis |
| Table 3.3.5.2 | Cross table of infectious keratitis by time point |
| Table 3.3.6.1 | Incidence of endophthalmitis |
| Table 3.3.6.2 | Cross table of endophthalmitis by time point |
| Table 3.4.1 | Important malfunctions |
| Table 3.4.2 | Onset time of important malfunctions |
| Table 3.5.1.1 | Causality of ocular topical adverse events (after tissue collection in the observation period) |
| Table 3.5.1.2 | Causality of ocular topical adverse events (treatment period) |
| Table 3.5.2.1 | Severity of ocular topical adverse events (after tissue collection in the observation period) |
| Table 3.5.2.2 | Severity of ocular topical adverse events (treatment period) |
| Table 3.5.3.1 | Seriousness of ocular topical adverse events (after tissue collection in the observation period) |
| Table 3.5.3.2 | Seriousness of ocular topical adverse events (treatment period) |
| Table 3.5.4.1 | Onset time of ocular topical adverse events (treatment period) |
| Table 3.5.4.2 | Onset time of ocular topical malfunctions |
| Table 3.6.1.1 | Causality of non-ocular topical adverse events (after tissue collection in the observation period) |
| Table 3.6.1.2 | Causality of non-ocular topical adverse events (treatment period) |
| Table 3.6.2.1 | Severity of non-ocular topical adverse events (after tissue collection in the observation period) |
| Table 3.6.2.2 | Severity of non-ocular topical adverse events (treatment period) |
| Table 3.6.3.1 | Seriousness of non-ocular topical adverse events (after tissue collection in the observation period) |
| Table 3.6.3.2 | Seriousness of non-ocular topical adverse events (treatment period) |
| Table 3.6.4.1 | Onset time of non-ocular topical adverse events (treatment period) |
| Table 3.6.4.2 | Onset time of non-ocular topical malfunctions |
| Table 3.7.1 | Ocular topical adverse events for each stratification factor (treatment period) |
| Table 3.7.2 | Ocular topical malfunctions for each stratification factor |
| Table 3.8.1 | Non-ocular topical adverse events for each stratification factor (treatment period) |
| Table 3.8.2 | Non-ocular topical malfunctions for each stratification factor |
| Table 3.10 | Shift table of laboratory values |
| Listing |  |
| Listing 1.1.1 | Patient list |
| Listing 1.1.2 | List of ineligible patients |
| Listing 1.2.1 | List of patients who discontinued (before enrollment completion in the observation period) |
| Listing 1.2.2 | List of patients who discontinued (after enrollment completion in the observation period) |
| Listing 1.2.3 | List of patients who discontinued (treatment period) |
| Listing 1.3.1 | List of patients with deviation from the protocol (observation period) |
| Listing 1.3.2 | List of patients with deviation from the protocol (treatment period) |
| Listing 2.1.1 | List of patients excluded from FAS |
| Listing 2.1.2 | List of patients excluded from PPS |
| Listing 2.1.3 | List of patients excluded from Observation Period Safety |
| Listing 2.1.4 | List of patients excluded from Treatment Period Safety |
| Listing 2.2.1 | List of patient backgrounds |
| Listing 2.2.2 | List of complications |
| Listing 2.2.3 | List of past diseases |
| Listing 2.2.4 | List of ocular surgery histories |
| Listing 2.3 | List of conduction status |
| Listing 2.4.1.1 | List of concomitant drugs (before tissue collection in the observation period) |
| Listing 2.4.1.2 | List of concomitant drugs (after tissue collection in the observation period) |
| Listing 2.4.1.3 | List of concomitant drugs (treatment period) |
| Listing 2.4.2.1 | List of concomitant therapies (before tissue collection in the observation period) |
| Listing 2.4.2.2 | List of concomitant therapies (after tissue collection in the observation period) |
| Listing 2.4.2.3 | List of concomitant therapies (treatment period) |
| Listing 2.5.2 | List of limbal stem cell deficiency severity classification |
| Listing 2.5.3 | List of subjective symptoms |
| Listing 2.5.4 | List of corrected visual acuity |
| Listing 2.5.5 | List of QOL evaluation |
| Listing 2.5.6 | List of the extent of corneal opacity |
| Listing 2.5.7 | List of the extent of corneal neovascularization |
| Listing 2.5.8 | List of the extent of symblepharon |
| Listing 2.5.9 | List of the applicability of additional treatments for visual improvement |
| Listing 3.3 | List of important safety assessment items |
| Listing 3.4.1 | List of important malfunctions (neoplastic lesions) |
| Listing 3.4.2 | List of important malfunctions (allergic symptoms) |
| Listing 3.4.3 | List of important malfunctions (unknown infectious diseases) |
| Listing 3.9.1 | List of patients with adverse events (before tissue collection in the observation period) |
| Listing 3.9.2 | List of patients with adverse events (after tissue collection in the observation period) |
| Listing 3.9.3 | List of patients with adverse events (treatment period) |
| Listing 3.9.4 | List of patients with deaths and other serious adverse events (before tissue collection in the observation period) |
| Listing 3.9.5 | List of patients with deaths and other serious adverse events (after tissue collection in the observation period) |
| Listing 3.9.6 | List of patients with deaths and other serious adverse events (treatment period) |
| Listing 3.9.7 | List of patients with adverse events resulting in discontinuation (before tissue collection in the observation period) |
| Listing 3.9.8 | List of patients with adverse events resulting in discontinuation (after tissue collection in the observation period) |
| Listing 3.9.9 | List of patients with adverse events resulting in discontinuation (treatment period) |
| Listing 3.10 | List of laboratory values |
| Listing 3.11 | List of product malfunctions |
| Figure |  |
| Figure 2.5.3.1 | Longitudinal change in subjective symptoms for each patient (eye pain) (FAS) |
| Figure 2.5.3.2 | Longitudinal change in subjective symptoms for each patient (foreign body sensation) (FAS) |
| Figure 2.5.3.3 | Longitudinal change in subjective symptoms for each patient (lacrimation) (FAS) |
| Figure 2.5.3.4 | Longitudinal change in subjective symptoms for each patient (photophobia) (FAS) |
| Figure 2.5.3.5 | Longitudinal change in subjective symptoms for each patient (dry sensation) (FAS) |
| Figure 2.5.3.6 | Longitudinal change in subjective symptoms for each patient (discomfort) (FAS) |
| Figure 2.5.4.1 | Longitudinal change in the variation of corrected visual acuity (Landolt ring) for each patient |
| Figure 2.5.4.3 | Longitudinal change of the variation of corrected visual acuity (ETDRS) for each patient |
| Figure 2.5.6 | Longitudinal change in the extent of corneal opacity for each patient |
| Figure 2.5.7 | Longitudinal change in the extent of corneal neovascularization for each patient |
| Figure 2.5.8 | Longitudinal change in the extent of symblepharon for each patient |
| Figure 3.3.1 | Longitudinal change in superficial punctate keratopathy for each patient |
| Figure 3.3.2 | Longitudinal change in corneal epithelial defect for each patient |
| Figure 3.3.3 | Longitudinal change in corneal keratinization for each patient |
| Figure 3.3.4 | Longitudinal change in Conjunctival injection for each patient |
| Figure 3.3.5 | Longitudinal change in infectious keratitis for each patient |
| Figure 3.3.6 | Longitudinal change in endophthalmitis for each patient |

End of Document
